# Supplementary material for: Atropoenantioselective palladaelectro-catalyzed anilide C–H olefinations viable with natural sunlight as sustainable power source
Source: Royal Society of Chemistry journal article supplement (doi:10.1039/d1sc06135f), 2022-01-01

## Supporting Information

### **Atropoenantioselective Palladaelectro-Catalyzed Anilide C–H Olefinations by Catalyst Control Viable with Natural Sunlight as an Energy Source**

Johanna Frey, Xiaoyan Hou, Lutz Ackermann\*

#### **Table of contents**

|                                                                            |    |
|----------------------------------------------------------------------------|----|
| General Information .....                                                  | 2  |
| Optimization of Reaction Conditions .....                                  | 4  |
| Experimental .....                                                         | 5  |
| Renewable energy power setup.....                                          | 36 |
| H/D exchange for the asymmetric C–H olefination.....                       | 37 |
| Determination of the KIE by comparison of the initial reaction rates ..... | 38 |
| Kinetic studies for the dependence in current.....                         | 39 |
| <i>In operando</i> React-IR .....                                          | 39 |
| Cyclic voltammetry .....                                                   | 41 |
| HRMS ESI analysis.....                                                     | 42 |
| References .....                                                           | 45 |
| NMR spectra .....                                                          | 45 |

## General Information

Technical grade solvents for extraction and chromatography (cyclohexane, *n*-pentane, dichloromethane, diethyl ether, ethyl acetate and methanol) were distilled before using. DCM, DMF and toluene were dried using a solvent purification system (SPS) from MBraun. DME was dried over sodium and distilled under N<sub>2</sub>.

Platinum electrodes (10 mm × 15 mm × 0.25 mm, 99.9%; obtained from ChemPur® Karlsruhe, Germany) and graphite felt (GF) electrodes (10 mm × 15 mm × 6 mm, SIGRACELL® GFA 6 EA, obtained from SGL Carbon, Wiesbaden, Germany) were connected using stainless steel adapters.

Electrocatalysis was conducted using an AUTOLAB multichannel Line from METROHM.

Amides **1** were synthesized according to known procedure.<sup>[1]</sup> Olefins **2** were used as obtained by commercial sources. Other chemicals were obtained from commercial sources and were used without further purification.

Routine TLC analysis was carried out on aluminium sheets coated with silica gel 60 F254, 0.2 mm thickness. Plates were revealed using a 254 nm ultraviolet lamp.

Chromatography was carried out on Merck silica gel 60 (40–63 µm).

GPC were done using a recycling preparative HPLC system from Japan Analytical Industries (*LC-92XX II Series, UV and RI Detector*) connected to JAIGEL HH series column, with HPLC grade chloroform.

Yields refer to isolated compounds, estimated to be >95% pure as determined by <sup>1</sup>H NMR spectroscopy.

NMR spectra were recorded on a Varian Mercury VX 300, Inova 500 or Bruker Avance III 300, Avance III 400 and Avance III HD 500 with chemical shift values being reported in ppm relative to residual chloroform ( $\delta_{\text{H}} = 7.26$  ppm or  $\delta_{\text{C}} = 77.2$  ppm). Data were treated with MestreNova software and are reported as follows: chemical shift, integration, multiplicity (s = singlet, d = doublet, t = triplet, q = quartet, quint = quintet, sept = septet, hept = heptet, m = multiplet, br = broad signal) and coupling constant (Hz).

Infrared spectra were recorded on a Bruker FT-IR Alpha-P device and are reported in wavenumbers ( $\text{cm}^{-1}$ ).

High resolution mass spectrometry (HRMS) spectra were recorded with APEX IV 7T FTICR. ESI-MS on Bruker MicroTOF and maXis.

Optical rotations were measured with Anton Paar MCP 150 at 20 °C under a Na/Hg lamp,  $\lambda = 589 \text{ nm}$  ( $c$  in  $\text{g}/100 \text{ mL}$ ). Values were denoted as specific rotations:  $[\alpha]_{\text{D}}^{20}$ .

Chiral HPLC measurements were performed on an Agilent 1290 Infinity using CHIRALPAK® columns ( $3.0 \mu\text{m}$  particle size;  $\varnothing 4.6 \text{ mm}$  and  $250 \text{ mm}$  lengths) at room temperature.

The structure of the major stereoisomer is shown. The ratio of diastereomers were established by means of  $^1\text{H}$ -NMR spectroscopy.

The absolute configuration of the products was determined by comparison with Shi's article.<sup>[1]</sup>

## Optimization of Reaction Conditions

| <p>Reaction scheme showing the electrocatalytic coupling of <b>1a</b> and <b>2a</b> to form <b>3aa</b>. Reagents: Pd(OAc)<sub>2</sub> (10 mol%), (S)-5-oxoproline (20 mol%), Additive (10 mol%), Base (2 equiv), TFE/DME, 24 h. Electrochemical setup: GF anode, Pt cathode.</p> |         |                  |        |                                        |                                                      |           |        |
|----------------------------------------------------------------------------------------------------------------------------------------------------------------------------------------------------------------------------------------------------------------------------------|---------|------------------|--------|----------------------------------------|------------------------------------------------------|-----------|--------|
| Entry                                                                                                                                                                                                                                                                            | Current | Temperature [°C] | Base   | Additive                               | Comments                                             | Yield [%] | ee [%] |
| 1                                                                                                                                                                                                                                                                                | 4 mA    | 50               | NaOAc  | -                                      |                                                      | 11        | 78     |
| 2                                                                                                                                                                                                                                                                                | 4 mA    | 50               | NaOPiv | -                                      |                                                      | 12        | 50     |
| 3                                                                                                                                                                                                                                                                                | 4 mA    | 50               | NaOAc  | 1,4-BQ                                 |                                                      | 78        | 97     |
| 4                                                                                                                                                                                                                                                                                | 4 mA    | 50               | NaOAc  | Cu(OAc) <sub>2</sub> •H <sub>2</sub> O |                                                      | 32        | 76     |
| 5                                                                                                                                                                                                                                                                                | 4 mA    | 50               | NaOAc  | 2,5-di- <i>tert</i> -butyl-1,4- BQ     |                                                      | 37        | 96     |
| 6                                                                                                                                                                                                                                                                                | 4 mA    | 50               | NaOAc  | (tris-4-bromophenyl)amine              |                                                      | 22        | 86     |
| 7                                                                                                                                                                                                                                                                                | 4 mA    | 50               | NaOAc  | ferrocene                              |                                                      | 57        | 96     |
| 8                                                                                                                                                                                                                                                                                | 4 mA    | 50               | NaOAc  | 1,4-BQ                                 | Under N <sub>2</sub> atmosphere                      | 65        | 98     |
| 9                                                                                                                                                                                                                                                                                | 4 mA    | 30               | NaOAc  | 1,4- BQ                                |                                                      | 22        | 97     |
| 10                                                                                                                                                                                                                                                                               | 4 mA    | 50               | NaOAc  | 1,4- BQ                                | <i>n</i> -Bu <sub>4</sub> NPF <sub>6</sub> (2 equiv) | 60        | 98     |
| 11                                                                                                                                                                                                                                                                               | 4 mA    | 60               | NaOAc  | 1,4- BQ                                |                                                      | 88        | 98     |
| 12                                                                                                                                                                                                                                                                               | 6 mA    | 60               | NaOAc  | 1,4- BQ                                |                                                      | 88        | 97     |
| 13                                                                                                                                                                                                                                                                               | 8 mA    | 60               | NaOAc  | 1,4- BQ                                |                                                      | 54        | 97     |
| 14                                                                                                                                                                                                                                                                               | 10 mA   | 60               | NaOAc  | 1,4- BQ                                |                                                      | 23        | 52     |
| 15                                                                                                                                                                                                                                                                               | 2 mA    | 60               | NaOAc  | 1,4- BQ                                |                                                      | 51        | 98     |
| 16                                                                                                                                                                                                                                                                               | 6 mA    | 70               | NaOAc  | 1,4- BQ                                |                                                      | 70        | 96     |
| 17                                                                                                                                                                                                                                                                               | 4 mA    | 30               | NaOAc  | 1,4- BQ                                | Blue LED irradiation                                 | Traces    | /      |
| 18                                                                                                                                                                                                                                                                               | 4 mA    | 60               | NaOAc  | 1,4- BQ                                | With divided cells <sup>[b]</sup>                    | 45        | 95     |
| 19                                                                                                                                                                                                                                                                               | 0.8 V   | 60               | NaOAc  | 1,4- BQ                                |                                                      | 63        | 96     |
| 20                                                                                                                                                                                                                                                                               | 0.4 V   | 60               | NaOAc  | 1,4- BQ                                |                                                      | 81        | 97     |
| 21                                                                                                                                                                                                                                                                               | -       | 60               | NaOAc  | 1,4- BQ                                |                                                      | 42        | 97     |
| 22                                                                                                                                                                                                                                                                               | -       | 60               | NaOAc  | -                                      |                                                      | 28        | 96     |
| 23                                                                                                                                                                                                                                                                               | 4 mA    | 60               | NaOAc  | 1,4- BQ                                | No palladium                                         | 0         | /      |
| 24                                                                                                                                                                                                                                                                               | -       | 60               | NaOAc  | 1,4-BQ (1 equiv)                       |                                                      | 60        | 97     |

[a] Reaction conditions: Undivided cell, **1a** (0.5 mmol), **2a** (1.5 mmol), [Pd] (10 mol%), (S)-5-oxoproline (20 mol%), additive (10 mol%), base (1.0 mmol), 2,2,2-trifluoroethanol (2.5 mL), DME (2.5 mL), 24 h, graphite felt (GF) anode, Pt-plate cathode, isolated yields, under air. [b] Divided cell, anode: **1a** (0.5 mmol), **2a** (1.5 mmol), [Pd] (10 mol%), (S)-5-oxoproline (20 mol%), 1,4-BQ (10 mol%), NaOAc (0.5 mmol), 2,2,2-trifluoroethanol (2.5 mL), DME (2.5 mL), graphite felt, (GF) anode, cathode: NaOAc (0.5 mmol), 2,2,2-trifluoroethanol (2.5 mL), DME (2.5 mL), Pt-plate cathode. Constant anodic potential with a silver wire as the reference electrode.



## Experimental

### General procedure A: Atroposelective palladaelectro-catalyzed C–H olefination

The electrocatalysis was carried out in an undivided cell, with a GF anode (10 mm x 15 mm x 6 mm) and a platinum cathode (10 mm x 15 mm x 0.25 mm). A 10 mL cell was charged with the amide **1** (0.5 mmol, 1.0 equiv), Pd(OAc)<sub>2</sub> (11.3 mg, 10 mol%), (*S*)-5-oxoproline (12.9 mg, 20 mol%), 1,4-benzoquinone (5.4 mg, 10 mol%) and NaOAc (82 mg, 1.0 mmol, 2.0 equiv). Then was added 2.5 mL of TFE, 2.5 mL of DME and the olefin **2** (1.5 mmol, 3.0 equiv). The electrocatalysis was performed at 60 °C with a constant current of 4.0 mA maintained for 24 h. The resulting mixture was filtered through a celite pad, eluted with EtOAc and concentrated *in vacuo*. The residue was purified by column chromatography to afford the title compound **3**.

### General procedure B: Sequential atroposelective palladaelectro-catalyzed C–H olefination/hydrogenation

The electrocatalysis was carried out in an undivided cell, with a GF anode (10 mm x 15 mm x 6 mm) and a platinum cathode (10 mm x 15 mm x 0.25 mm). A 10 mL cell was charged with the amide **1** (0.5 mmol, 1.0 equiv), Pd(OAc)<sub>2</sub> (11.3 mg, 10 mol%), (*S*)-5-oxoproline (12.9 mg, 20 mol%), 1,4-benzoquinone (5.4 mg, 10 mol%) and NaOAc (82 mg, 1.0 mmol, 2.0 equiv). Then was added 2.5 mL of TFE, 2.5 mL of DME and the olefin **2** (1.5 mmol, 3.0 equiv). The electrocatalysis was performed at 60 °C with a constant current of 4.0 mA maintained for 24 h. The current was then stopped and a balloon of H<sub>2</sub> was added. The mixture was stirred at 60 °C for 24 h, filtered through a celite pad, eluted with EtOAc and concentrated *in vacuo*. The residue was purified by column chromatography to afford the title compound **3**.

### General procedure for the synthesis of racemic products

The racemic compounds were prepared using *rac*-(*S/R*)-5-oxoproline as the chiral ligand instead of (*S*)-5-oxoproline, following the general procedure A or B.

**Tert-butyl 3-(3-(*N*-benzylpicolinamido)-3-isopropylphenyl)acrylate 3aa**

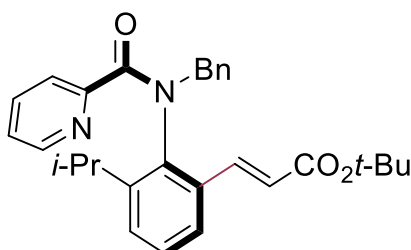

Prepared according to general procedure **A** on a 0.5 mmol scale, column chromatography (*n*-hexane/acetone = 9:1) afforded the title compound as a pale yellow foam (205 mg, 0.45 mmol, 90%), with an enantiomeric ratio of 99/1.

**HRMS** (ESI) calcd for  $C_{29}H_{33}N_2O_3^+$ : 457.2486. Found: 457.2488;

$[\alpha]_{20}^D = -88.9$  ( $c = 1.00$ ,  $CH_2Cl_2$ );

$\nu_{max}$  (thin film/ $cm^{-1}$ ): 1049, 1078, 1147, 1233, 1257, 1287, 1316, 1367, 1390, 1445, 1472, 1568, 1585, 1639, 1704, 2869, 2931, 2967, 3007;

**$^1H$  NMR** (400 MHz,  $CDCl_3$ )  $\delta$  8.10 (ddd,  $J = 4.8, 1.7, 0.9$  Hz, 1H), 7.66 (dt,  $J = 7.9, 1.1$  Hz, 1H), 7.54 (td,  $J = 7.8, 1.8$  Hz, 1H), 7.32 (d,  $J = 15.9$  Hz, 1H), 7.25 – 7.16 (m, 8H), 7.04 (ddd,  $J = 7.6, 4.8, 1.2$  Hz, 1H), 5.90 (d,  $J = 15.9$  Hz, 1H), 5.20 (d,  $J = 13.6$  Hz, 1H), 4.75 (d,  $J = 13.6$  Hz, 1H), 2.98 (hept,  $J = 6.8$  Hz, 1H), 1.50 (s, 9H), 0.84 (d,  $J = 6.8$  Hz, 3H), 0.81 (d,  $J = 6.8$  Hz, 3H);

**$^{13}C$  NMR** (100 MHz,  $CDCl_3$ )  $\delta$  168.4 ( $C_q$ ), 165.7 ( $C_q$ ), 153.3 ( $C_q$ ), 147.6 (CH), 147.1, ( $C_q$ ) 140.5 (CH), 139.0 ( $C_q$ ), 136.0 (CH), 135.9 ( $C_q$ ), 133.4 ( $C_q$ ), 130.6 (CH), 128.4 (CH), 128.3 (CH), 128.1 (CH), 127.9 (CH), 124.4 (CH), 124.3 (CH), 124.2 (CH), 121.7 (CH), 80.3 ( $C_q$ ), 54.5 ( $CH_2$ ), 28.3 ( $CH_3$ ), 28.2 (CH), 24.2 ( $CH_3$ ), 23.6 ( $CH_3$ );

**$R_t$**  (AS-3 column, Hex/IPA 95/5, 1.2 mL/min, 273 nm):  $t_r$ (major) = 5.4 min,  $t_r$ (minor) = 8.8 min, 98% *ee*.

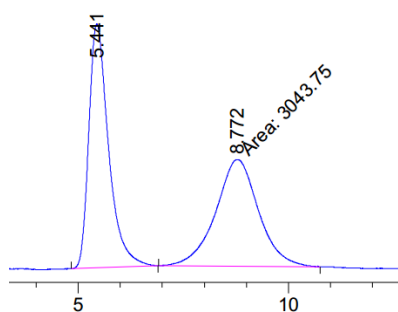

| Peak # | RetTime [min] | Type | Width [min] | Area [mAU*s] | Height [mAU] | Area %  |
|--------|---------------|------|-------------|--------------|--------------|---------|
| 1      | 5.441         | BB   | 0.4660      | 3175.45264   | 97.49440     | 51.0588 |
| 2      | 8.772         | MM   | 1.1871      | 3043.75049   | 42.73253     | 48.9412 |

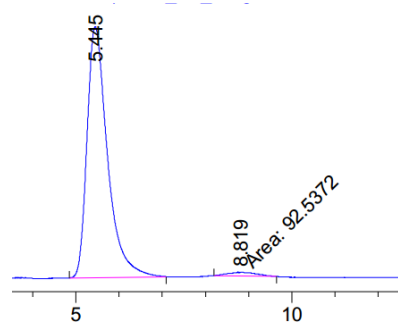

| Peak # | RetTime [min] | Type | Width [min] | Area [mAU*s] | Height [mAU] | Area %  |
|--------|---------------|------|-------------|--------------|--------------|---------|
| 1      | 5.445         | BV R | 0.4726      | 4323.95996   | 131.51231    | 99.0395 |
| 2      | 8.819         | MM   | 0.5617      | 41.93618     | 1.24432      | 0.9605  |

### Ethyl (E)-3-(2-(N-benzylpicolinamido)-3-isopropylphenyl)acrylate 3ab

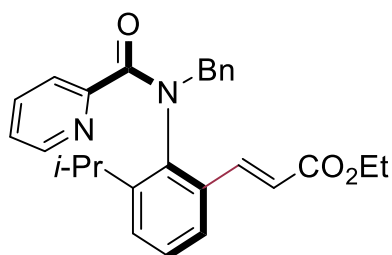

Prepared according to general procedure **A** on a 0.5 mmol scale, column chromatography (*n*-hexane/EtOAc = 7:3) afforded the title compound as yellow oil (186 mg, 0.43 mmol, 87%), with an enantiomeric ratio of 96/4.

**HRMS** (ESI) calcd for  $C_{27}H_{29}N_2O_3^+$ : 429.2173. Found: 429.2173;

$[\alpha]_D^{20}$  = -120.2 ( $c$  = 1.02,  $CHCl_3$ );

$\nu_{max}$  (thin film/ $cm^{-1}$ ): 1044, 1078, 1166, 1260, 1308, 1365, 1390, 1444, 1495, 1567, 1585, 1638, 1709, 2869, 2929, 2964, 3061;

**$^1H$  NMR** (400 MHz,  $CDCl_3$ )  $\delta$  8.09 (ddd,  $J$  = 4.8, 1.8, 0.9 Hz, 1H), 7.67 (dt,  $J$  = 7.9, 1.1 Hz, 1H), 7.58–7.52 (m, 1H), 7.48–7.42 (m, 1H), 7.27–7.21 (m, 3H), 7.21–7.15 (m, 5H), 7.04 (ddd,  $J$  = 7.6, 4.8, 1.2 Hz, 1H), 6.01 (d,  $J$  = 15.9 Hz, 1H), 5.17 (d,  $J$  = 13.6 Hz, 1H), 4.78 (d,  $J$  = 13.6 Hz, 1H), 4.25–4.14 (m, 2H), 2.93 (hept,  $J$  = 6.7 Hz, 1H), 1.30 (t,  $J$  = 7.1 Hz, 3H), 0.81 (d,  $J$  = 6.7 Hz, 3H), 0.75 (d,  $J$  = 6.7 Hz, 3H);

**$^{13}C$  NMR** (100 MHz,  $CDCl_3$ )  $\delta$  168.4 ( $C_q$ ), 166.5 ( $C_q$ ), 153.3 ( $C_q$ ), 147.6 (CH), 147.1 ( $C_q$ ), 141.7 (CH), 139.2 ( $C_q$ ), 136.1 (CH), 135.9 ( $C_q$ ), 133.4 ( $C_q$ ), 130.6 (CH), 128.6 (CH), 128.4 (CH), 128.2 (CH), 128.0 (CH), 124.4 (CH), 124.3 (CH), 119.8 (CH), 60.4 ( $CH_2$ ), 54.6 ( $CH_2$ ), 28.2 (CH), 24.2 ( $CH_3$ ), 23.5 ( $CH_3$ ), 14.4 ( $CH_3$ );

**$R_t$**  (AS-3 column, Hex/IPA 95/5, 1.2 mL/min, 273 nm):  $t_r$ (major) = 9.8 min,  $t_r$ (minor) = 15.6 min, 92% *ee*.

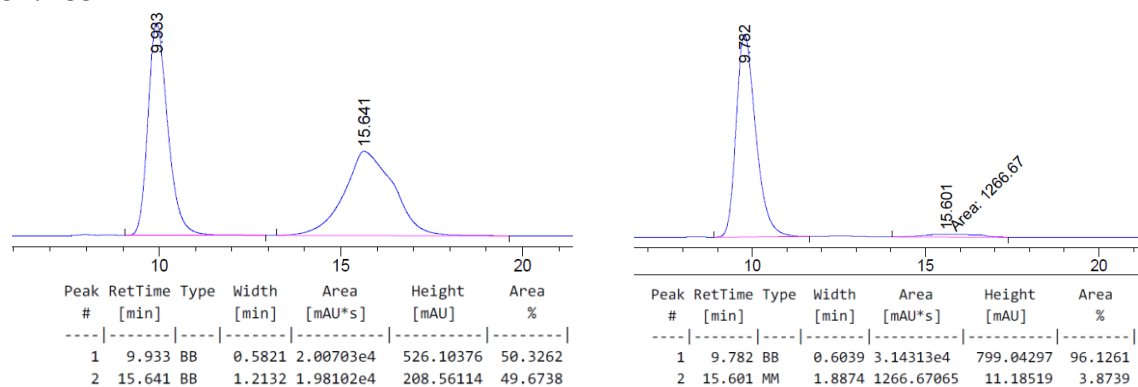

**Butyl (E)-3-(2-(N-benzylpicolinamido)-3-isopropylphenyl)acrylate 3ac**

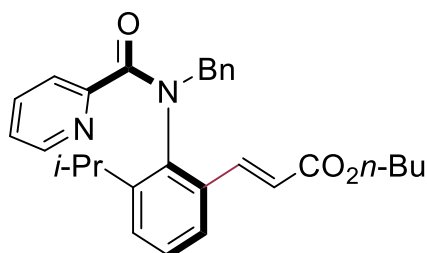

Prepared according to general procedure **A** on a 0.5 mmol scale, column chromatography (*n*-hexane/EtOAc = 7:3) afforded the title compound as yellow oil (178 mg, 0.39 mmol, 78%), with an enantiomeric ratio of 96/4.

**HRMS** (ESI) calcd for  $C_{29}H_{33}N_2O_3^+$ : 457.2486. Found: 457.2487;

$[\alpha]_{20}^D = -49.9$  ( $c = 0.95$ ,  $CHCl_3$ );

$\nu_{max}$  (thin film/ $cm^{-1}$ ): 1064, 1166, 1260, 1307, 1388, 1445, 1470, 1567, 1585, 1640, 1709, 2870, 2932, 2961, 3030, 3063;

**$^1H$  NMR** (400 MHz,  $CDCl_3$ )  $\delta$  8.04 (ddd,  $J = 4.8, 1.8, 0.9$  Hz, 1H), 7.64 (dt,  $J = 7.8, 1.1$  Hz, 1H), 7.50 (td,  $J = 7.8, 1.8$  Hz, 1H), 7.43 (d,  $J = 16.0$  Hz, 1H), 7.23–7.18 (m, 3H), 7.17–7.11 (m, 5H), 7.01–6.95 (m, 1H), 5.98 (d,  $J = 15.9$  Hz, 1H), 5.15 (d,  $J = 13.6$  Hz, 1H), 4.75 (d,  $J = 13.6$  Hz, 1H), 4.15–4.06 (m, 2H), 2.93 (hept,  $J = 6.8$  Hz, 1H), 1.68–1.58 (m, 2H), 1.45–1.34 (m, 2H), 0.94 (t,  $J = 7.3$  Hz, 3H), 0.79 (d,  $J = 6.8$  Hz, 3H), 0.75 (d,  $J = 6.8$  Hz, 3H).

**$^{13}C$  NMR** (101 MHz,  $CDCl_3$ )  $\delta$  168.2 ( $C_q$ ), 166.3 ( $C_q$ ), 153.0 ( $C_q$ ), 147.3 (CH), 146.9 ( $C_q$ ), 141.3 (CH), 138.9 ( $C_q$ ), 135.8 (CH), 135.7 ( $C_q$ ), 133.1 ( $C_q$ ), 130.3 (CH), 128.5 (CH), 128.3 (CH), 128.1 (CH), 127.7 (CH), 124.3 (CH), 124.1 (CH), 124.0 (CH), 119.6 (CH), 64.2 ( $CH_2$ ), 54.4 ( $CH_2$ ), 30.6 ( $CH_2$ ), 28.0 (CH), 24.1 ( $CH_3$ ), 23.3 ( $CH_3$ ), 19.1 ( $CH_2$ ), 13.7 ( $CH_3$ ).

**$R_t$**  (AS-3 column, Hex/IPA 90/10, 1.0 mL/min, 273 nm):  $t_r$ (major) = 6.7 min,  $t_r$ (minor) = 9.2 min, 92% *ee*.

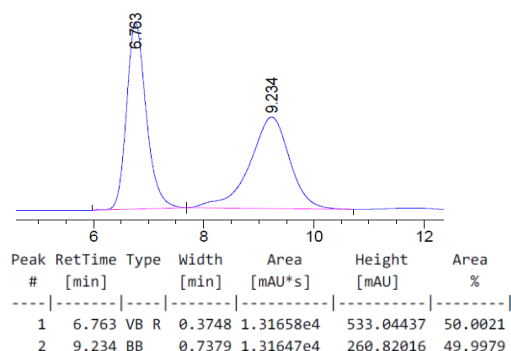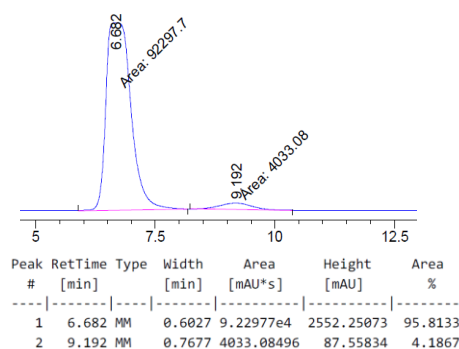

***N*-benzyl-*N*-(2-isopropyl-6-(3-oxobut-1-en-1-yl)phenyl)picolinamide 3ad**

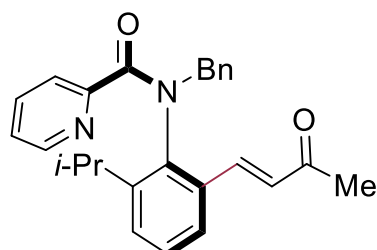

Prepared according to general procedure **A** on a 0.5 mmol scale, column chromatography (*n*-hexane/EtOAc = 7:3) followed by GPC afforded the title compound as pale brown powder (141 mg, 0.35 mmol, 71%), with an enantiomeric ratio of 96/4.

**HRMS** (ESI) calcd for C<sub>26</sub>H<sub>27</sub>N<sub>2</sub>O<sub>2</sub><sup>+</sup>: 399.2067. Found: 399.2067;

**[α]<sub>D</sub><sup>20</sup>** = -41.3 (*c* = 1.03, CHCl<sub>3</sub>);

**ν<sub>max</sub>** (thin film/cm<sup>-1</sup>): 1048, 1079, 1166, 1228, 1255, 1286, 1336, 1359, 1389, 1444, 1472, 1495, 1568, 1584, 1660, 1691, 2245, 2869, 2930, 2964, 3030, 3061;

**<sup>1</sup>H NMR** (400 MHz, CDCl<sub>3</sub>) δ 8.15 – 8.00 (m, 1H), 7.71 – 7.61 (m, 1H), 7.56 (td, *J* = 7.7, 1.5 Hz, 1H), 7.32 – 7.27 (m, 3H), 7.25 – 7.18 (m, 5H), 7.06 (t, *J* = 6.2 Hz, 1H), 7.01 (d, *J* = 16.4 Hz, 1H), 6.09 (d, *J* = 16.4 Hz, 1H), 5.61 (d, *J* = 13.5 Hz, 1H), 4.35 (d, *J* = 13.5 Hz, 1H), 3.14 (hept, *J* = 6.8 Hz, 1H), 2.00 (s, 3H), 1.11 (d, *J* = 6.8 Hz, 3H), 1.00 (d, *J* = 6.8 Hz, 3H).

**<sup>13</sup>C NMR** (100 MHz, CDCl<sub>3</sub>) δ 199.2 (C<sub>q</sub>), 154.6 (C<sub>q</sub>), 147.5 (C<sub>q</sub>), 147.1 (C<sub>q</sub>), 141.5 (CH), 139.6 (C<sub>q</sub>), 136.2 (CH), 135.8 (C<sub>q</sub>), 133.5 (C<sub>q</sub>), 130.7 (CH), 129.1 (CH), 129.0 (CH), 128.9 (CH), 128.6 (CH), 128.5 (CH), 128.4 (CH), 128.4 (CH), 128.3 (CH), 124.1 (CH), 54.8 (CH<sub>2</sub>), 28.4 (CH<sub>3</sub>), 26.0 (CH), 24.5 (CH<sub>3</sub>), 23.7 (CH<sub>3</sub>);

**R<sub>t</sub>** (AS-3 column, Hex/IPA 80/20, 1.0 mL/min, 273 nm): *t<sub>r</sub>*(major) = 6.6 min, *t<sub>r</sub>*(minor) = 8.6 min, 92% *ee*.

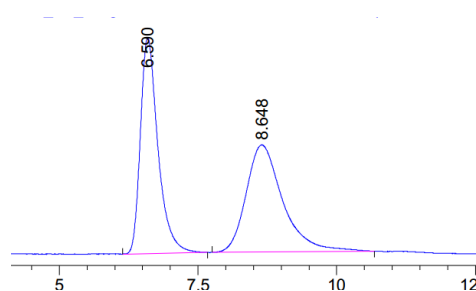

| Peak # | RetTime [min] | Type | Width [min] | Area [mAU*s] | Height [mAU] | Area %  |
|--------|---------------|------|-------------|--------------|--------------|---------|
| 1      | 6.590         | BB   | 0.3305      | 1009.44196   | 45.90656     | 49.0687 |
| 2      | 8.648         | BB   | 0.6228      | 1047.75989   | 22.77252     | 50.9313 |

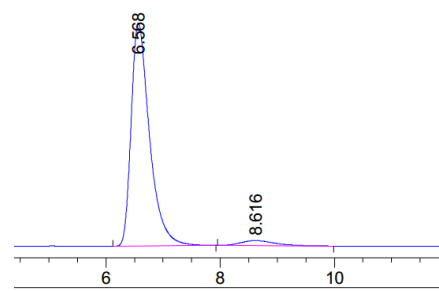

| Peak # | RetTime [min] | Type | Width [min] | Area [mAU*s] | Height [mAU] | Area %  |
|--------|---------------|------|-------------|--------------|--------------|---------|
| 1      | 6.568         | BB   | 0.3381      | 1.67912e4    | 750.32416    | 95.9003 |
| 2      | 8.616         | BB   | 0.5074      | 717.81958    | 17.14570     | 4.0997  |

***N*-benzyl-*N*-(2-(3-(dimethylamino)-3-oxoprop-1-en-1-yl)-6-isopropylphenyl)picolinamide  
3ae**

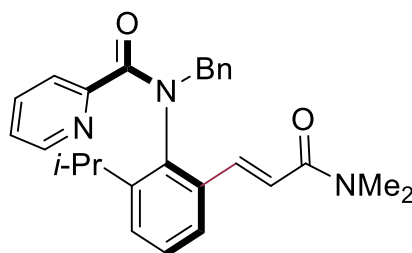

Prepared according to general procedure **A** on a 0.5 mmol scale, column chromatography (DCM/MeOH = 98:2) afforded the title compound as white foam (143 mg, 0.33 mmol, 67%), with an enantiomeric ratio of 96/4.

**HRMS** (ESI) calcd for  $C_{27}H_{30}N_3O_2^+$ : 428.2333. Found: 428.2334;

$[\alpha]_{20}^D = -183.9$  ( $c = 1.07$ ,  $CHCl_3$ );

$\nu_{max}$  (thin film/ $cm^{-1}$ ): 1049, 1078, 1140, 1167, 1260, 1286, 1336, 1359, 1391, 1443, 1472, 1494, 1567, 585, 1608, 1642, 2239, 2869, 2930, 2963, 3030, 3062;

**$^1H$  NMR** (400 MHz,  $CDCl_3$ )  $\delta$  8.16 (d,  $J = 4.7$  Hz, 1H), 7.66 (dd,  $J = 11.6, 3.8$  Hz, 1H), 7.59 (d,  $J = 15.6$  Hz, 1H), 7.53 (td,  $J = 7.8, 1.6$  Hz, 1H), 7.37 – 7.22 (m, 4H), 7.21 – 7.15 (m, 3H), 7.11 – 6.99 (m, 2H), 6.63 (d,  $J = 15.6$  Hz, 1H), 5.22 (d,  $J = 13.8$  Hz, 1H), 4.75 (d,  $J = 13.8$  Hz, 1H), 3.03 (s, 6H), 2.77 (hept,  $J = 6.7$  Hz, 1H), 0.56 (d,  $J = 6.7$  Hz, 3H), 0.53 (d,  $J = 6.7$  Hz, 3H);

**$^{13}C$  NMR** (100 MHz,  $CDCl_3$ )  $\delta$  168.4 ( $C_q$ ), 166.6 ( $C_q$ ), 153.2 ( $C_q$ ), 147.8 (CH), 147.2 ( $C_q$ ), 139.4 (CH), 138.8 ( $C_q$ ), 136.5 ( $C_q$ ), 136.1 (CH), 134.0 ( $C_q$ ), 130.6 (CH), 128.4 (CH), 128.1 (CH), 127.9 (CH), 127.8 (CH), 125.2 (CH), 124.4 (CH), 124.4 (CH), 120.2 (CH), 54.4 ( $CH_2$ ), 37.6 (CH), 28.0 ( $CH_3$ ), 24.0 ( $CH_3$ ), 23.4 ( $CH_3$ );

**$R_t$**  (AD-3 column, Hex/IPA 70/30, 1.0 mL/min, 250 nm):  $t_r$ (major) = 10.7 min,  $t_r$ (minor) = 9.7 min, 92% ee.

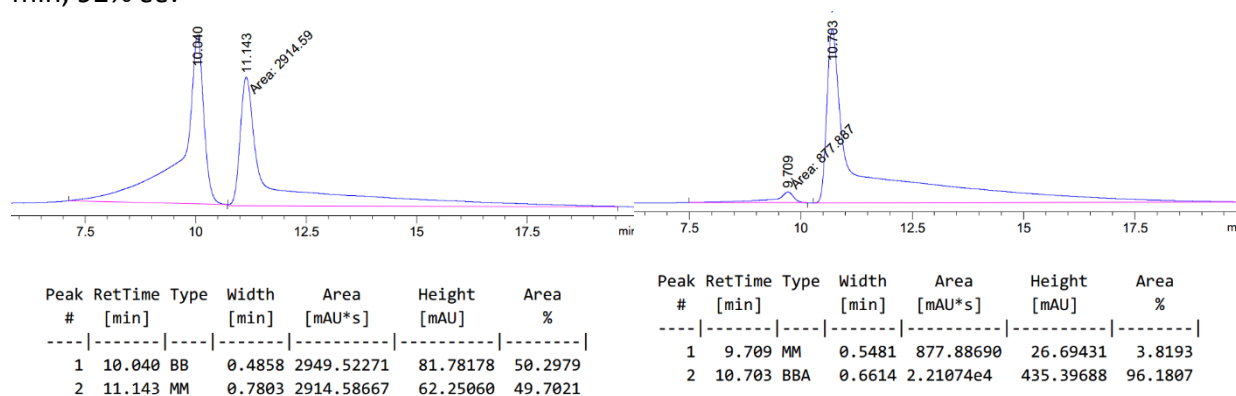

### ***N*-benzyl-*N*-(2-isopropyl-6-styrylphenyl)picolinamide 3af**

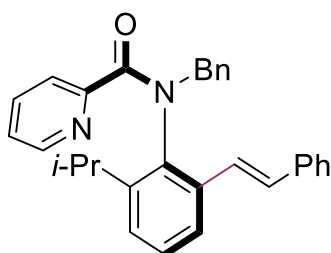

Prepared according to general procedure **A** on a 0.5 mmol scale, column chromatography (*n*-hexane/acetone = 9:1) afforded the title compound as pale brown foam (146 mg, 0.34 mmol, 68%), with an enantiomeric ratio of 98/2.

**HRMS** (ESI) calcd for C<sub>30</sub>H<sub>29</sub>N<sub>2</sub>O<sup>+</sup>: 433.2274. Found: 433.2277;

**[α]<sub>D</sub><sup>20</sup>** = -137.4 (*c* = 0.85, CHCl<sub>3</sub>);

**ν<sub>max</sub>** (thin film/cm<sup>-1</sup>): 1049, 1078, 1167, 1242, 1286, 1335, 1392, 1440, 1471, 1496, 1567, 1585, 1640, 2868, 2930, 3028, 3060;

**<sup>1</sup>H NMR** (400 MHz, CDCl<sub>3</sub>) δ 8.19 (d, *J* = 4.8 Hz, 1H), 7.52 – 7.43 (m, 2H), 7.40 – 7.35 (m, 2H), 7.31 (ddt, *J* = 12.4, 7.0, 1.1 Hz, 3H), 7.26 – 7.23 (m, 3H), 7.22 – 7.14 (m, 4H), 7.09 (dd, *J* = 7.8, 1.6 Hz, 1H), 7.04 (ddd, *J* = 6.1, 4.7, 2.7 Hz, 1H), 6.82 (d, *J* = 16.3 Hz, 1H), 6.70 (d, *J* = 16.3 Hz, 1H), 5.19 (d, *J* = 13.6 Hz, 1H), 4.87 (d, *J* = 13.6 Hz, 1H), 3.02 (hept, *J* = 6.8 Hz, 1H), 0.86 (d, *J* = 6.8 Hz, 3H), 0.85 (d, *J* = 6.8 Hz, 3H);

**<sup>13</sup>C NMR** (100 MHz, CDCl<sub>3</sub>) δ 169.1 (C<sub>q</sub>), 153.7 (C<sub>q</sub>), 147.8 (CH), 147.0 (C<sub>q</sub>), 138.1 (C<sub>q</sub>), 137.3 (C<sub>q</sub>), 136.5 (C<sub>q</sub>), 135.9 (C<sub>q</sub>), 135.8 (CH), 130.6 (CH), 128.7 (CH), 128.5 (CH), 128.2 (CH), 128.0 (CH), 127.8 (CH), 126.7 (CH), 126.3 (CH), 125.9 (CH), 124.2 (CH), 123.8 (CH), 123.3 (CH), 54.5 (CH<sub>2</sub>), 28.3 (CH), 24.4 (CH<sub>3</sub>), 23.6 (CH<sub>3</sub>);

**R<sub>t</sub>** (AS-3 column, Hex/IPA 90/10, 1.0 mL/min, 273 nm): *t<sub>r</sub>*(major) = 6.9 min, *t<sub>r</sub>*(minor) = 8.6 min, 96% *ee*.

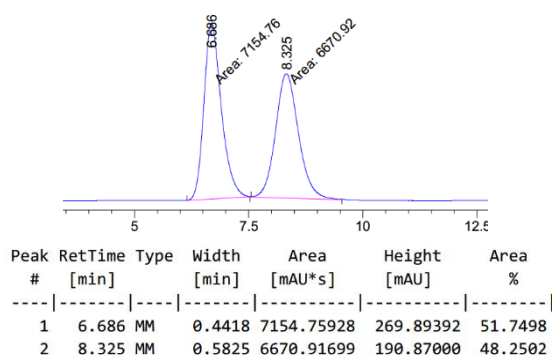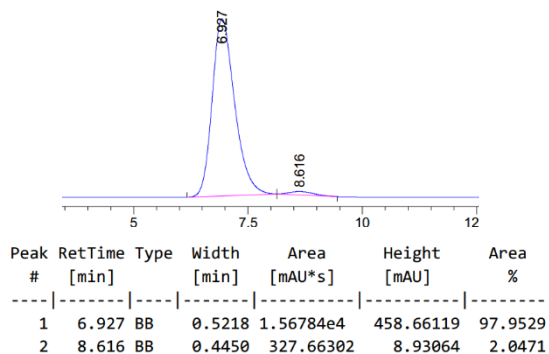

***N*-benzyl-*N*-(2-(4-fluorostyryl)-6-isopropylphenyl)picolinamide 3ag**

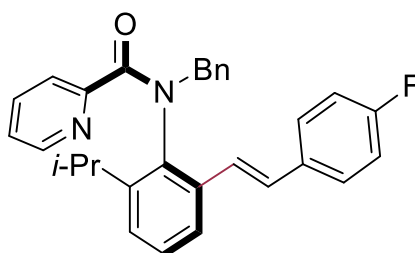

Prepared according to general procedure **A** on a 0.5 mmol scale, column chromatography (*n*-hexane/acetone = 9:1) afforded the title compound as pale brown foam (145 mg, 0.32 mmol, 65%), with an enantiomeric ratio of 97/3.

**HRMS** (ESI) calcd for C<sub>30</sub>H<sub>28</sub>FN<sub>2</sub>O<sup>+</sup>: 451.2180. Found: 451.2181;

**[α]<sub>D</sub><sup>20</sup>** = -120.8 (*c* = 0.96, CHCl<sub>3</sub>);

**ν<sub>max</sub>** (thin film/cm<sup>-1</sup>): 1049, 1078, 1095, 1158, 1226, 1287, 1336, 1392, 1443, 1472, 1508, 1568, 1585, 1600, 1639, 2869, 2929, 2964, 3031, 3063;

**<sup>1</sup>H NMR** (400 MHz, CDCl<sub>3</sub>) δ 8.18 (dt, *J* = 4.7, 1.3 Hz, 1H), 7.48 – 7.46 (m, 2H), 7.37 – 7.35 (m, 2H), 7.28 (dd, *J* = 7.7, 1.5 Hz, 1H), 7.22 – 7.16 (m, 6H), 7.10 (dd, *J* = 7.7, 1.5 Hz, 1H), 7.04 (ddd, *J* = 5.8, 4.8, 2.9 Hz, 1H), 6.98 (t, *J* = 8.6 Hz, 2H), 6.68 (d, *J* = 16.2 Hz, 1H), 6.62 (d, *J* = 16.2 Hz, 1H), 5.25 (d, *J* = 13.6 Hz, 1H), 4.77 (d, *J* = 13.6 Hz, 1H), 3.03 (hept, *J* = 6.8 Hz, 1H), 0.89 (d, *J* = 6.8 Hz, 3H), 0.88 (d, *J* = 6.8 Hz, 3H);

**<sup>13</sup>C NMR** (100 MHz, CDCl<sub>3</sub>) δ 169.1 (C<sub>q</sub>), 162.5 (d, *J* = 247.4 Hz, C<sub>q</sub>), 153.7 (C<sub>q</sub>), 147.7 (CH), 147.0 (C<sub>q</sub>), 138.1 (C<sub>q</sub>), 136.5 (C<sub>q</sub>), 135.9 (CH), 135.8 (C<sub>q</sub>), 133.5 (d, *J* = 3.3 Hz, C<sub>q</sub>), 130.6 (CH), 129.2 (CH), 128.5 (CH), 128.3 (CH), 128.2 (CH), 128.0 (CH), 126.3 (CH), 125.7 (d, *J* = 2.4 Hz, CH), 124.3 (CH), 123.8 (CH), 123.2 (CH), 115.6 (d, *J* = 21.6 Hz, CH), 54.5 (CH<sub>2</sub>), 28.4 (CH), 24.4 (CH<sub>3</sub>), 23.7 (CH<sub>3</sub>); **<sup>19</sup>F NMR** (282 MHz) δ -114,1;

**R<sub>t</sub>** (AD-3 column, Hex/IPA 90/10, 1.2 mL/min, 250 nm): *t<sub>r</sub>*(major) = 21.1 min, *t<sub>r</sub>*(minor) = 18.8 min, 94% ee.

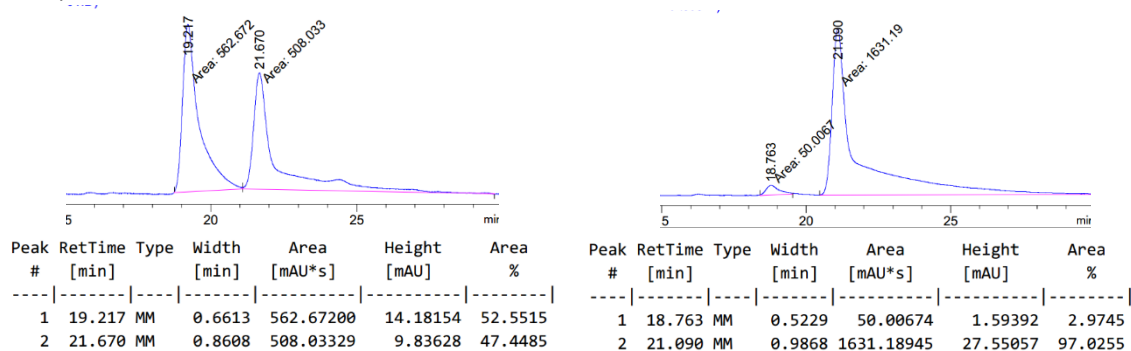



## Diethyl (2-(*N*-benzylpicolinamido)-3-isopropylstyryl)phosphate 3ah

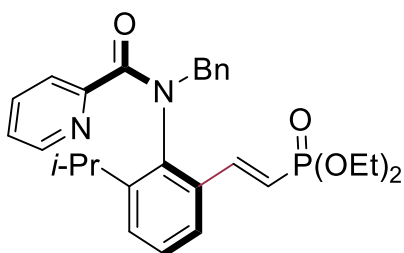

Prepared according to general procedure **A** on a 0.5 mmol scale, column chromatography (*n*-hexane/acetone = 8:2) afforded the title compound as pale brown foam (81 mg, 0.16 mmol, 33%), with an enantiomeric ratio of 94.5/5.5.

**HRMS** (ESI) calcd for  $C_{28}H_{34}N_2O_4P^+$ : 493.2251. Found: 493.2252;

$[\alpha]_{20}^D = -89.9$  ( $c = 1.03$ ,  $CHCl_3$ );

$\nu_{max}$  (thin film/ $cm^{-1}$ ): 1023, 1049, 1165, 1241, 1284, 1336, 1391, 1443, 1472, 1568, 1585, 1643, 2869, 2929, 2965, 3062;

**$^1H$  NMR** (400 MHz,  $CDCl_3$ )  $\delta$  8.08 (ddd,  $J = 4.8, 1.8, 0.9$  Hz, 1H), 7.69 (dt,  $J = 7.9, 1.0$  Hz, 1H), 7.57 (td,  $J = 7.8, 1.7$  Hz, 1H), 7.28 – 7.24 (m, 4H), 7.23 – 7.20 (m, 3H), 7.19 (d,  $J = 7.7$  Hz, 1H), 7.14 (dd,  $J = 7.8, 1.6$  Hz, 1H), 7.06 (ddd,  $J = 7.6, 4.7, 1.2$  Hz, 1H), 6.02 (dd,  $J = 19.1, 17.5$  Hz, 1H), 5.03 (d,  $J = 13.7$  Hz, 1H), 4.90 (d,  $J = 13.7$  Hz, 1H), 4.14 – 3.96 (m, 4H), 2.85 (hept,  $J = 6.8$  Hz, 1H), 1.31 (d,  $J = 7.1$  Hz, 6H), 0.70 (d,  $J = 6.8$  Hz, 3H), 0.69 (d,  $J = 6.8$  Hz, 3H);

**$^{13}C$  NMR** (100 MHz,  $CDCl_3$ )  $\delta$  168.6 ( $C_q$ ), 153.1 ( $C_q$ ), 147.5 (CH), 147.1 ( $C_q$ ), 144.9 (d,  $J = 6.9$  Hz, CH), 139.1 ( $C_q$ ), 136.2 (CH), 135.9 ( $C_q$ ), 133.6 (d,  $J = 22.6$  Hz,  $C_q$ ), 130.5 (CH), 128.6 (CH), 128.6 (CH), 128.2 (CH), 128.0 (CH), 124.5 (CH), 124.2 (CH), 124.2 (CH), 116.3 (d,  $J = 192.0$  Hz, CH), 62.1 (d,  $J = 5.6$  Hz,  $CH_2$ ), 62.0 (d,  $J = 5.9$  Hz,  $CH_2$ ), 54.8 ( $CH_2$ ), 28.2 (CH), 24.0 ( $CH_3$ ), 23.6 ( $CH_3$ ), 16.6 ( $CH_3$ ), 16.5 ( $CH_3$ );

**$^{31}P$  NMR** (121 MHz)  $\delta$  18.3;

**$R_t$**  (AD-3 column, Hex/IPA 80/20, 1.0 mL/min, 250 nm):  $t_r$ (major) = 11.8 min,  $t_r$ (minor) = 9.8 min, 89% *ee*.

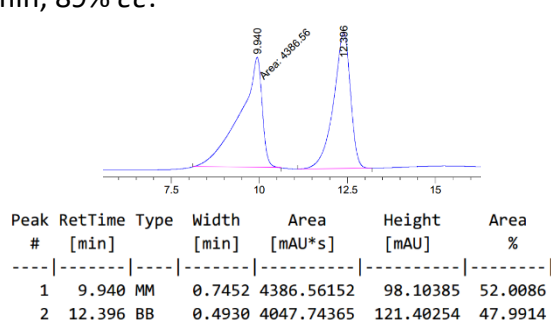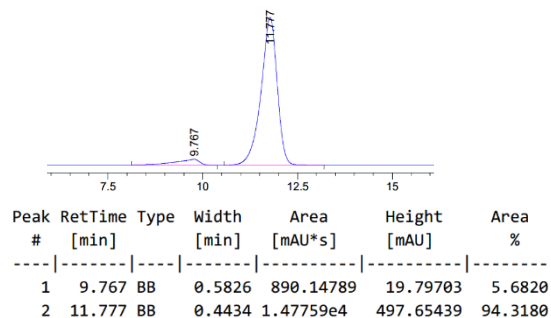

**Methyl (3-(2-(*N*-benzylpicolinamido)-3-isopropylphenyl)acryloyl)-*L*-phenylalaninate 3ai**

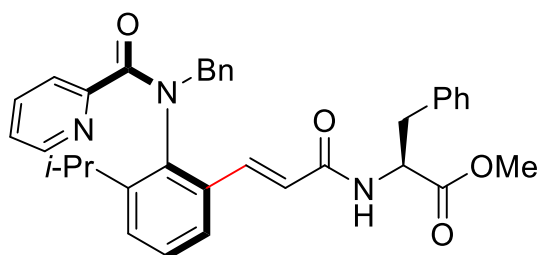

Prepared according to general procedure **A** on a 0.5 mmol scale, column chromatography (*n*-hexane/EtOAc = 7:3 to 6:4) afforded the title compound as white foam (270 mg, 0.4 mmol, 96%), with an diastereomeric ratio >95/5.

**HRMS** (ESI) calcd for  $C_{35}H_{36}N_3O_4^+$ : 562.2700. Found: 562.2697;

$[\alpha]_{20}^D = -40.7$  ( $c = 0.96$ ,  $CHCl_3$ );

$\nu_{max}$  (thin film/ $cm^{-1}$ ): 1079, 1170, 1205, 1237, 1261, 1285, 1335, 1359, 1394, 1444, 1496, 1534, 1585, 1630, 1743, 2248, 2869, 2930, 2963, 3030, 3063, 3317;

**$^1H$  NMR** (400 MHz,  $CDCl_3$ )  $\delta$  8.16 (dt,  $J = 3.9, 0.8$  Hz, 1H), 7.61 (dt,  $J = 8.0, 1.0$  Hz, 1H), 7.54 (td,  $J = 7.7, 1.7$  Hz, 1H), 7.32 – 7.30 (m, 2H), 7.29 (d,  $J = 3.3$  Hz, 1H), 7.26 – 7.23 (m, 1H), 7.20 (td,  $J = 7.1, 1.8$  Hz, 3H), 7.17 (t,  $J = 7.5$  Hz, 1H), 7.15 – 7.12 (m, 5H), 7.07 (ddd,  $J = 7.6, 4.8, 1.2$  Hz, 1H), 6.13 (d,  $J = 7.8$  Hz, 1H), 6.02 (d,  $J = 15.8$  Hz, 1H), 5.08 (d,  $J = 13.7$  Hz, 1H), 4.94 (dt,  $J = 7.7, 5.9$  Hz, 1H), 4.86 (d,  $J = 13.7$  Hz, 1H), 3.76 (s, 3H), 3.30 – 3.07 (m, 2H), 2.91 (hept,  $J = 6.8$  Hz, 1H), 0.77 (d,  $J = 6.8$  Hz, 3H), 0.74 (d,  $J = 6.8$  Hz, 3H);

**$^{13}C$  NMR** (100 MHz,  $CDCl_3$ )  $\delta$  172.3 ( $C_q$ ), 168.4 ( $C_q$ ), 165.5 ( $C_q$ ), 153.3 ( $C_q$ ), 147.8 (CH), 147.1 ( $C_q$ ), 138.8 ( $C_q$ ), 138.0 (CH), 136.2 (CH), 136.2 ( $C_q$ ), 136.0 ( $C_q$ ), 133.6 ( $C_q$ ), 130.6 (CH), 129.4 (CH), 128.8 (CH), 128.5 (CH), 128.3 (CH), 128.2 (CH), 128.1 (CH), 127.2 (CH), 124.5 (CH), 124.5 (CH), 124.2 (CH), 122.6 (CH), 54.4 ( $CH_2$ ), 53.5 (CH), 52.5 ( $CH_3$ ), 38.1 ( $CH_2$ ), 28.2 (CH), 24.2 ( $CH_3$ ), 23.6 ( $CH_3$ ).

**(2R,5R)-5-isopropyl-2-methylcyclohexyl (E)-3-(2-(N-benzylpicolinamido)-3-isopropylphenyl)acrylate 3aj**

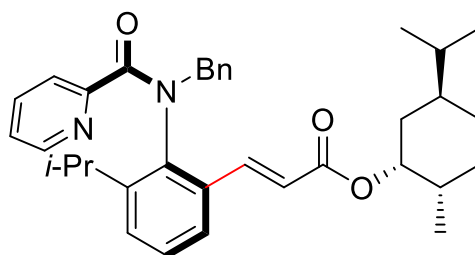

Prepared according to general procedure **A** on a 0.5 mmol scale, column chromatography (*n*-hexane/acetone = 9:1) afforded the title compound as a colorless foam (197 mg, 0.37 mmol, 73%), with an enantiomeric ratio of 96/4.

**HRMS** (ESI) calcd for  $C_{35}H_{43}N_2O_3^+$ : 539.3268. Found: 539.3272;

$[\alpha]_{20}^D = -58.5$  ( $c = 1.00$ ,  $CH_2Cl_2$ );

$\nu_{max}$  (thin film/ $cm^{-1}$ ): 1078, 1168, 1260, 1306, 1388, 1445, 1585, 1643, 1704, 2869, 2928, 2957;

$^1H$  NMR (400 MHz,  $CDCl_3$ )  $\delta$  8.17 – 8.05 (m, 1H), 7.75 – 7.65 (m, 1H), 7.59 – 7.35 (m, 2H), 7.30 – 7.10 (m, 9H), 7.10 – 7.01 (m, 1H), 6.07 – 5.89 (m, 1H), 5.45 – 5.08 (m, 1H), 4.93 – 4.57 (m, 2H), 3.19 – 2.87 (m, 1H), 2.04 (td,  $J = 14.5, 3.8$  Hz, 1H), 1.91 (hept,  $J = 3.4$  Hz, 1H), 1.79 – 1.66 (m, 2H), 1.62 – 1.36 (m, 2H), 1.03 – 0.88 (m, 10H), 0.84 – 0.76 (m, 6H);

$^{13}C$  NMR (100 MHz,  $CDCl_3$ )  $\delta$  168.3 ( $C_q$ ), 165.9 ( $C_q$ ), 153.3 ( $C_q$ ), 147.4 (CH), 147.1 ( $C_q$ ), 141.2 (CH), 139.1 ( $C_q$ ), 135.9 (CH), 135.8 ( $C_q$ ), 133.3 ( $C_q$ ), 130.5 (CH), 128.6 (CH), 128.4 (CH), 128.1 (CH), 127.9 (CH), 124.4 (CH), 124.3 (CH), 124.1 (CH), 120.2 (CH), 74.1 (CH), 54.4 ( $CH_2$ ), 47.1 (CH), 41.0 ( $CH_2$ ), 34.3 ( $CH_2$ ), 31.4 (CH), 28.2 (CH), 26.3 (CH), 24.1 ( $CH_3$ ), 23.6 ( $CH_2$ ), 23.5 ( $CH_3$ ), 22.1 ( $CH_3$ ), 20.9 ( $CH_3$ ), 16.5 ( $CH_3$ );

$R_t$  (AD-3 column, Hex/IPA 90/10, 1.0 mL/min, 273 nm):  $t_r$ (major) = 11.3 min,  $t_r$ (minor) = 13.1 min, 92% *ee*.

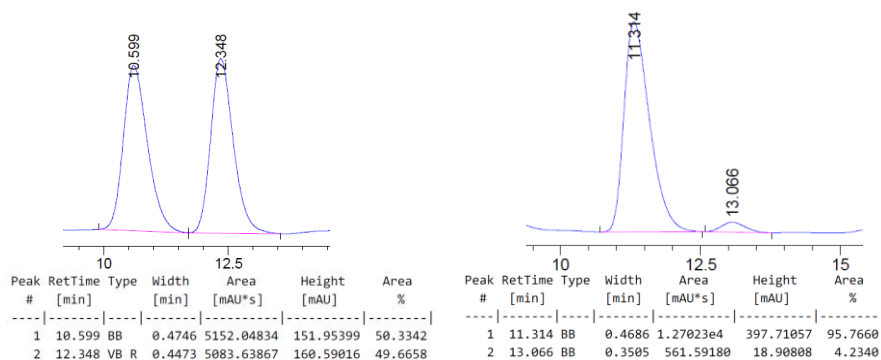

**(E)-N-benzyl-N-(2-(3-hydroxy-3,7-dimethylocta-1,6-dien-1-yl)-6-isopropylphenyl)picolinamide 3ak**

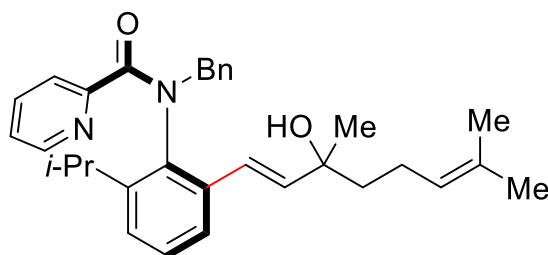

Prepared according to general procedure **A** on a 0.5 mmol scale, column chromatography (*n*-hexane/acetone = 9:1) afforded the two diastereoisomer of the title compound as colorless oils in a ratio of 1/1 (146 mg, 0.30 mmol, 60%). The two diastereoisomers were separated by column chromatography.

The first fraction has an enantiomeric ratio of 97.5/2.5.

**HRMS** (ESI) calcd for  $C_{32}H_{39}N_2O_2^+$ : 483.3006. Found: 483.2994;

$[\alpha]_{20}^D = -204$  ( $c = 0.50$ ,  $CH_2Cl_2$ );

$\nu_{max}$  (thin film/ $cm^{-1}$ ): 1078, 1167, 1238, 1286, 1336, 1396, 1441, 1473, 1567, 1585, 1637, 2868, 2926, 2963, 3059, 3440;

**$^1H$  NMR** (400 MHz,  $CDCl_3$ )  $\delta$  8.18 (d,  $J = 4.8$ , 1H), 7.52 – 7.43 (m, 2H), 7.37 – 7.31 (m, 2H), 7.27 – 7.21 (m, 3H), 7.16 – 7.11 (m, 2H), 7.10 – 7.05 (m, 1H), 7.06 – 7.01 (m, 1H), 6.14 (d,  $J = 16.1$  Hz, 1H), 5.90 (d,  $J = 16.1$  Hz, 1H), 5.29 (d,  $J = 13.7$  Hz, 1H), 5.10 – 5.03 (m, 1H), 4.66 (d,  $J = 13.7$  Hz, 1H), 3.03 (hept,  $J = 6.8$  Hz, 1H), 1.99 – 1.81 (m, 2H), 1.66 (q,  $J = 1.3$  Hz, 3H), 1.55 (d,  $J = 1.4$  Hz, 3H), 1.53 – 1.39 (m, 2H), 1.15 (s, 3H), 0.91 (d,  $J = 6.6$  Hz, 3H), 0.90 (d,  $J = 6.6$  Hz, 3H);

**$^{13}C$  NMR** (100 MHz,  $CDCl_3$ )  $\delta$  168.9 ( $C_q$ ), 153.6 ( $C_q$ ), 147.9 (CH), 146.8 ( $C_q$ ), 138.5 (CH), 137.9 ( $C_q$ ), 136.6 ( $C_q$ ), 135.8 (CH), 135.5 ( $C_q$ ), 131.7 ( $C_q$ ), 130.8 (CH), 128.5 (CH), 128.1 (CH), 127.9 (CH), 126.1 (CH), 124.5 (CH), 124.2 (CH), 124.1 (CH), 123.7 (CH), 123.4 (CH), 73.1 ( $C_q$ ), 54.3 ( $CH_2$ ), 42.3 ( $CH_2$ ), 28.3 (CH), 28.1 ( $CH_3$ ), 25.8 ( $CH_3$ ), 24.5 ( $CH_3$ ), 23.6 ( $CH_3$ ), 23.0 ( $CH_2$ ), 17.8 ( $CH_3$ );

**$R_t$**  (AD-3 column, Hex/IPA 80/20, 1.0 mL/min, 273 nm): P1  $t_r$ (major) = 6.3 min,  $t_r$ (minor) = 9.7 min, 95% *ee*.

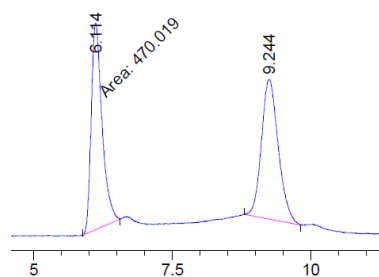

| Peak # | RetTime [min] | Type | Width [min] | Area [mAU*s] | Height [mAU] | Area %  |
|--------|---------------|------|-------------|--------------|--------------|---------|
| 1      | 6.114         | MM   | 0.2262      | 470.01938    | 34.63272     | 48.7111 |
| 2      | 9.244         | BB   | 0.2731      | 494.89340    | 23.45688     | 51.2889 |

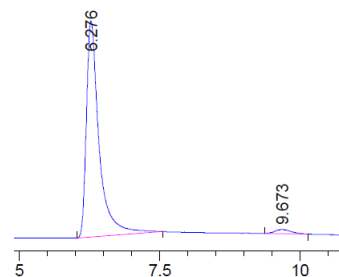

| Peak # | RetTime [min] | Type | Width [min] | Area [mAU*s] | Height [mAU] | Area %  |
|--------|---------------|------|-------------|--------------|--------------|---------|
| 1      | 6.276         | BB   | 0.2305      | 3721.78101   | 236.60236    | 97.5673 |
| 2      | 9.673         | BB   | 0.2361      | 92.79662     | 4.70594      | 2.4327  |

The second fraction has an enantiomeric ratio of 96.5/3.5.

**HRMS** (ESI) calcd for  $C_{32}H_{39}N_2O_2^+$ : 483.3006. Found: 483.2995;

$[\alpha]_D^{20} = -88.8$  ( $c = 1.00$ ,  $CH_2Cl_2$ );

$\nu_{max}$  (thin film/ $cm^{-1}$ ): 1078, 1167, 1240, 1286, 1336, 1394, 1442, 1472, 1568, 1585, 1637, 2868, 2926, 2964, 3061, 3454;

**$^1H$  NMR** (400 MHz,  $CDCl_3$ )  $\delta$  8.20 – 8.16 (m, 1H), 7.52 – 7.44 (m, 2H), 7.35 – 7.31 (m, 2H), 7.26 – 7.21 (m, 3H), 7.15 – 7.12 (m, 2H), 7.09 – 7.05 (m, 1H), 7.03 (ddd,  $J = 6.9, 4.8, 1.8$  Hz, 1H), 6.18 (d,  $J = 16.1$  Hz, 1H), 5.92 (d,  $J = 16.1$  Hz, 1H), 5.26 (d,  $J = 13.6$  Hz, 1H), 5.09 – 5.03 (m, 1H), 4.70 (d,  $J = 13.6$  Hz, 1H), 3.02 (hept,  $J = 6.8$  Hz, 1H), 1.96 – 1.81 (m, 2H), 1.66 (s, 3H), 1.56 (s, 3H), 1.50 – 1.41 (m, 2H), 1.16 (s, 3H), 0.88 (d,  $J = 6.7$  Hz, 3H), 0.88 (d,  $J = 6.7$  Hz, 3H);

**$^{13}C$  NMR** (100 MHz,  $CDCl_3$ )  $\delta$  168.9 ( $C_q$ ), 153.6 ( $C_q$ ), 147.9 (CH), 146.8 ( $C_q$ ), 138.7 (CH), 137.8 ( $C_q$ ), 136.6 ( $C_q$ ), 135.7 (CH), 135.4 ( $C_q$ ), 131.8 ( $C_q$ ), 130.7 (CH), 128.5 (CH), 128.1 (CH), 127.8 (CH), 126.1 (CH), 124.4 (CH), 124.2 (CH), 124.1 (CH), 123.7 (CH), 123.5 (CH), 73.0 ( $C_q$ ), 54.3 ( $CH_2$ ), 42.6 ( $CH_2$ ), 28.3 (CH), 27.5 ( $CH_3$ ), 25.8 ( $CH_3$ ), 24.5 ( $CH_3$ ), 23.6 ( $CH_3$ ), 22.9 ( $CH_2$ ), 17.8 ( $CH_3$ );

**$R_t$**  (AD-3 column, Hex/IPA 80/20, 1.0 mL/min, 273 nm): P2  $t_r$ (major) = 6.7 min,  $t_r$ (minor) = 12.2 min, 93% ee.

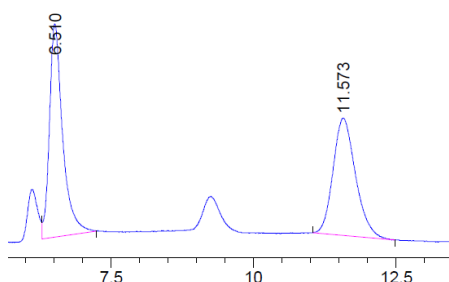

| Peak # | RetTime [min] | Type | Width [min] | Area [mAU*s] | Height [mAU] | Area %  |
|--------|---------------|------|-------------|--------------|--------------|---------|
| 1      | 6.510         | VB   | 0.2370      | 818.90314    | 50.82763     | 51.6328 |
| 2      | 11.573        | BB   | 0.3508      | 767.11078    | 27.98165     | 48.3672 |

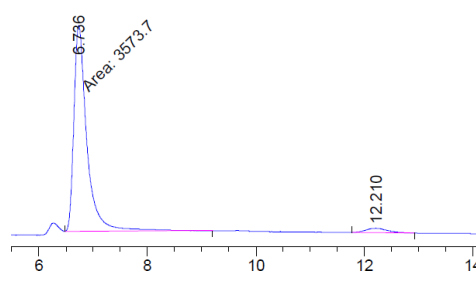

| Peak # | RetTime [min] | Type | Width [min] | Area [mAU*s] | Height [mAU] | Area %  |
|--------|---------------|------|-------------|--------------|--------------|---------|
| 1      | 6.736         | MM   | 0.2773      | 3573.69775   | 214.79782    | 96.5449 |
| 2      | 12.210        | BB   | 0.3227      | 127.89192    | 4.66650      | 3.4551  |

### ***N*-benzyl-*N*-(2-cinnamyl-6-isopropylphenyl)picolinamide 3aI**

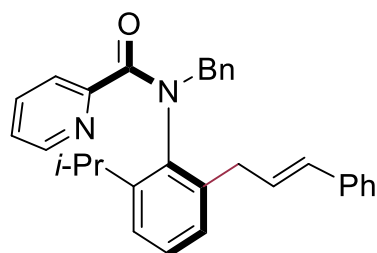

Prepared according to general procedure **A** on a 0.5 mmol scale, column chromatography (*n*-hexane/acetone = 9:1) afforded the title compound as pale yellow solid (92 mg, 0.21 mmol, 41%), with an enantiomeric ratio of 97/3.

**HRMS** (ESI) calcd for C<sub>31</sub>H<sub>31</sub>N<sub>2</sub>O<sup>+</sup>: 447.2431. Found: 447.2431;

**[α]<sub>D</sub><sup>20</sup>** = -30.7 (*c* = 0.89, CHCl<sub>3</sub>);

**ν<sub>max</sub>** (thin film/cm<sup>-1</sup>): 1048, 1078, 1167, 1235, 1287, 1336, 1356, 1394, 1439, 1450, 1471, 1495, 1567, 1585, 1637, 2868, 2929, 2963, 3027, 3060;

**<sup>1</sup>H NMR** (400 MHz, CDCl<sub>3</sub>) δ 8.20 (d, *J* = 4.7 Hz, 1H), 7.68 (dt, *J* = 7.9, 1.1 Hz, 1H), 7.57 (td, *J* = 7.7, 1.8 Hz, 1H), 7.36 – 7.31 (m, 2H), 7.31 – 7.25 (m, 5H), 7.23 – 7.20 (m, 2H), 7.12 (d, *J* = 7.6 Hz, 1H), 7.11 – 7.03 (m, 3H), 6.91 (dd, *J* = 7.5, 1.6 Hz, 1H), 6.18 (d, *J* = 15.8 Hz, 1H), 5.67 (dt, *J* = 15.8, 7.0 Hz, 1H), 5.34 (d, *J* = 13.6 Hz, 1H), 4.71 (d, *J* = 13.6 Hz, 1H), 3.14 (ddd, *J* = 16.0, 7.0, 1.5 Hz, 1H), 3.03 (hept, *J* = 6.7 Hz, 1H), 2.94 (ddd, *J* = 16.0, 6.9, 1.5 Hz, 1H), 0.94 (d, *J* = 6.7 Hz, 3H), 0.90 (d, *J* = 6.7 Hz, 3H);

**<sup>13</sup>C NMR** (100 MHz, CDCl<sub>3</sub>) δ 168.8 (C<sub>q</sub>), 153.6 (C<sub>q</sub>), 147.6 (CH), 146.5 (C<sub>q</sub>), 138.5 (C<sub>q</sub>), 138.3 (C<sub>q</sub>), 137.6 (C<sub>q</sub>), 136.6 (C<sub>q</sub>), 136.1 (CH), 131.4 (CH), 130.6 (CH), 130.5 (CH), 128.7 (CH), 128.6 (CH), 128.4 (CH), 128.0 (CH), 127.1 (CH), 127.1 (CH), 126.1 (CH), 124.9 (CH), 124.4 (CH), 124.1 (CH), 54.4 (CH<sub>2</sub>), 35.0 (CH<sub>2</sub>), 28.6 (CH), 24.6 (CH<sub>3</sub>), 23.9 (CH<sub>3</sub>);

**R<sub>t</sub>** (ID-3 column, Hex/IPA 95/05, 1.0 mL/min, 250 nm): *t<sub>r</sub>*(major) = 16.2 min, *t<sub>r</sub>*(minor) = 17.7 min, 94% *ee*.

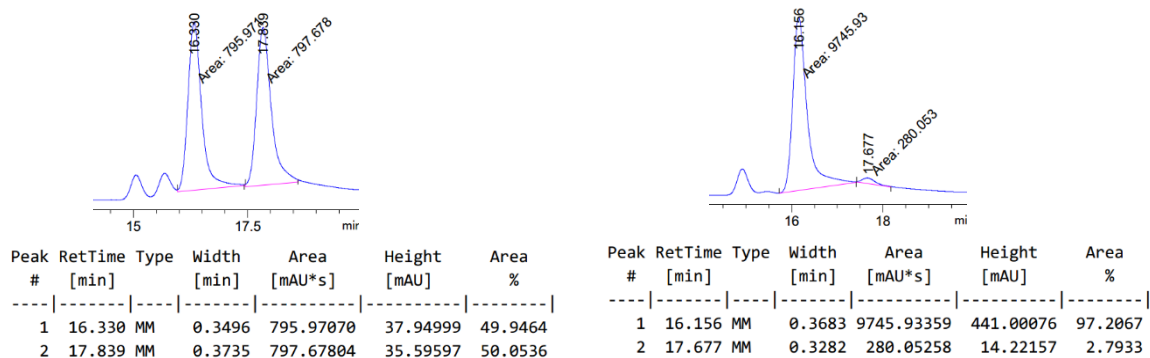

## Ethyl 2-(2-(*N*-benzylpicolinamido)-3-isopropylbenzyl)acrylate 3am

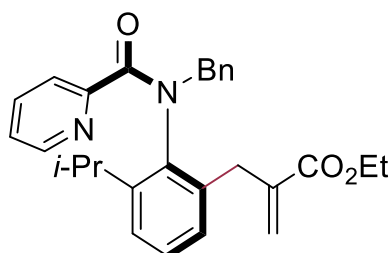

Prepared according to general procedure **A** on a 0.5 mmol scale, column chromatography (*n*-hexane/acetone = 9:1) afforded the title compound as pale yellow oil (128 mg, 0.29 mmol, 58%), with an enantiomeric ratio of 91/9.

**HRMS** (ESI) calcd for  $C_{28}H_{31}N_2O_3^+$ : 443.2329. Found: 443.2328;

$[\alpha]_D^{20} = -50.7$  ( $c = 1.03$ ,  $CHCl_3$ );

$\nu_{max}$  (thin film/ $cm^{-1}$ ): 1028, 1078, 1143, 1169, 1197, 1210, 1249, 1286, 1334, 1364, 1395, 1440, 1452, 1471, 1567, 1585, 1638, 1714, 2869, 2930, 2964, 3062;

**$^1H$  NMR** (400 MHz,  $CDCl_3$ )  $\delta$  8.17 (dt,  $J = 4.8, 1.3$  Hz, 1H), 7.69 (dt,  $J = 8.0, 1.2$  Hz, 1H), 7.57 (td,  $J = 7.7, 1.7$  Hz, 1H), 7.37 – 7.30 (m, 2H), 7.26 – 7.20 (m, 3H), 7.11 (d,  $J = 7.7$  Hz, 1H), 7.11 – 7.02 (m, 1H), 6.97 (dd,  $J = 7.9, 1.5$  Hz, 1H), 6.84 (dd,  $J = 7.6, 1.5$  Hz, 1H), 6.11 (d,  $J = 1.3$  Hz, 1H), 5.16 (dd,  $J = 7.7, 6.1$  Hz, 2H), 4.90 (d,  $J = 13.7$  Hz, 1H), 4.18 (q,  $J = 7.1$  Hz, 2H), 3.66 – 3.27 (m, 2H), 2.80 (hept,  $J = 6.6$  Hz, 1H), 1.26 (t,  $J = 7.1$  Hz, 3H), 0.64 (d,  $J = 6.6$  Hz, 3H), 0.62 (d,  $J = 6.6$  Hz, 3H);

**$^{13}C$  NMR** (100 MHz,  $CDCl_3$ )  $\delta$  168.7 ( $C_q$ ), 167.1 ( $C_q$ ), 153.3 ( $C_q$ ), 147.6 (CH), 146.8 ( $C_q$ ), 139.4 ( $C_q$ ), 139.2 ( $C_q$ ), 136.9 ( $C_q$ ), 136.8 ( $C_q$ ), 136.1 (CH), 130.4 (CH), 128.5 (CH), 127.9 (CH), 127.8 (CH), 127.1 (CH), 126.8 ( $CH_2$ ), 124.9 (CH), 124.5 (CH), 124.5 (CH), 60.9 ( $CH_2$ ), 54.3 ( $CH_2$ ), 33.8 ( $CH_2$ ), 28.5 (CH), 24.2 ( $CH_3$ ), 23.7 ( $CH_3$ ), 14.4 ( $CH_3$ );

**$R_t$**  (ID-3 column, Hex/IPA 80/20, 1.0 mL/min, 250 nm):  $t_r$ (major) = 11.3 min,  $t_r$ (minor) = 13.2 min, 82% ee.

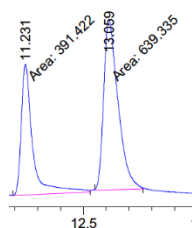

| Peak # | RetTime [min] | Type | Width [min] | Area [mAU*s] | Height [mAU] | Area %  |
|--------|---------------|------|-------------|--------------|--------------|---------|
| 1      | 11.231        | MM   | 0.2910      | 391.42188    | 22.41537     | 37.9742 |
| 2      | 13.059        | MM   | 0.3644      | 639.33514    | 29.24508     | 62.0258 |

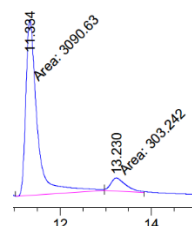

| Peak # | RetTime [min] | Type | Width [min] | Area [mAU*s] | Height [mAU] | Area %  |
|--------|---------------|------|-------------|--------------|--------------|---------|
| 1      | 11.334        | MM   | 0.2902      | 3090.63428   | 177.49234    | 91.0650 |
| 2      | 13.230        | MM   | 0.3860      | 303.24219    | 13.09423     | 8.9350  |

### ***N*-benzyl-*N*-(2-isopropyl-6-octylphenyl)picolinamide 3an**

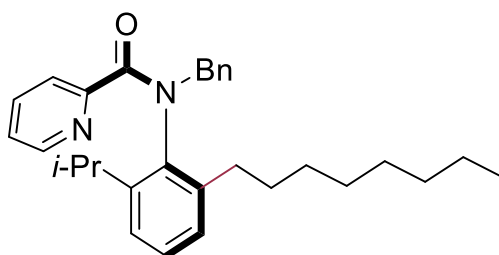

Prepared according to general procedure **B** on a 0.5 mmol scale, column chromatography (*n*-hexane/acetone = 9:1) afforded the title compound as colorless oil (127 mg, 0.28 mmol, 58%), with an enantiomeric ratio of 95/5.

**HRMS** (ESI) calcd for  $C_{30}H_{39}N_2O^+$ : 443.3057. Found: 443.3053;

$[\alpha]_{20}^D = -15.9$  ( $c = 1.04$ ,  $CHCl_3$ );

$\nu_{max}$  (thin film/ $cm^{-1}$ ): 1047, 1078, 1090, 1168, 1195, 1210, 1237, 1287, 1306, 1336, 1357, 1395, 1439, 1452, 1495, 1568, 1586, 1640, 2855, 2925, 2959, 3030, 3062;

$^1H$  NMR (400 MHz,  $CDCl_3$ )  $\delta$  8.17 (ddd,  $J = 4.7, 1.7, 1.0$  Hz, 1H), 7.61 – 7.52 (m, 2H), 7.35 – 7.30 (m, 2H), 7.25 – 7.22 (m, 3H), 7.13 (t,  $J = 7.7$  Hz, 1H), 7.06 (ddd,  $J = 7.3, 4.8, 1.5$  Hz, 1H), 6.98 (dd,  $J = 7.8, 1.6$  Hz, 1H), 6.91 (dd,  $J = 7.6, 1.6$  Hz, 1H), 5.13 (d,  $J = 13.7$  Hz, 1H), 4.82 (d,  $J = 13.7$  Hz, 1H), 2.96 (hept,  $J = 6.8$  Hz, 1H), 2.20 (ddd,  $J = 15.6, 7.6, 3.5$  Hz, 1H), 2.08 (ddd,  $J = 15.3, 11.2, 4.5$  Hz, 1H), 1.36 – 1.03 (m, 13H), 0.89 (t,  $J = 7.0$  Hz, 2H), 0.84 (d,  $J = 6.8$  Hz, 6H);

$^{13}C$  NMR (100 MHz,  $CDCl_3$ )  $\delta$  168.9 ( $C_q$ ), 153.8 ( $C_q$ ), 147.7 (CH), 146.4 ( $C_q$ ), 140.5 ( $C_q$ ), 138.6 ( $C_q$ ), 136.8 ( $C_q$ ), 135.8 (CH), 130.4 (CH), 128.4 (CH), 127.9 (CH), 127.8 (CH), 125.9 (CH), 124.2 (CH), 124.2 (CH), 123.8 (CH), 54.5 ( $CH_2$ ), 32.0 ( $CH_2$ ), 31.2 ( $CH_2$ ), 30.1 ( $CH_2$ ), 29.8 ( $CH_2$ ), 29.6 ( $CH_2$ ), 29.4 ( $CH_2$ ), 28.6 (CH), 24.6 ( $CH_3$ ), 23.8 ( $CH_3$ ), 22.8 ( $CH_2$ ), 14.3 ( $CH_3$ );

$R_t$  (AD-3 column, Hex/IPA 90/10, 0.5 mL/min, 273 nm):  $t_r$ (major) = 10.2 min,  $t_r$ (minor) = 11.7 min, 90% ee.

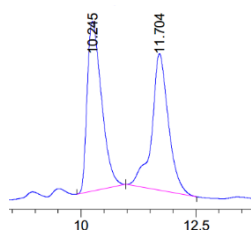

| Peak # | RetTime [min] | Type | Width [min] | Area [mAU*s] | Height [mAU] | Area %  |
|--------|---------------|------|-------------|--------------|--------------|---------|
| 1      | 10.245        | BB   | 0.3384      | 2882.62256   | 132.69370    | 51.6420 |
| 2      | 11.704        | BB   | 0.3676      | 2699.31494   | 106.90063    | 48.3580 |

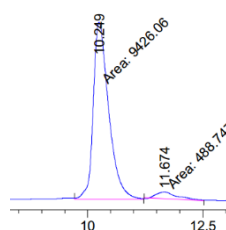

| Peak # | RetTime [min] | Type | Width [min] | Area [mAU*s] | Height [mAU] | Area %  |
|--------|---------------|------|-------------|--------------|--------------|---------|
| 1      | 10.249        | MM   | 0.3896      | 9426.06348   | 403.28116    | 95.0705 |
| 2      | 11.674        | MM   | 0.5245      | 488.74716    | 15.53042     | 4.9295  |



***N*-benzyl-*N*-(2-(10-hydroxydecyl)-6-isopropylphenyl)picolinamide 3ao**

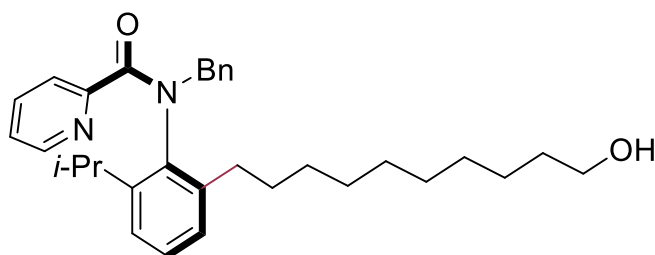

Prepared according to general procedure **B** on a 0.5 mmol scale, column chromatography (*n*-hexane/EtOAc = 7:3) afforded the title compound as pale brown oil (190 mg, 0.39 mmol, ), with an enantiomeric ratio of 92/8.

**HRMS** (ESI) calcd for C<sub>32</sub>H<sub>43</sub>N<sub>2</sub>O<sub>2</sub><sup>+</sup>: 487.3319. Found: 487.3314;

**[α]<sub>D</sub><sup>20</sup>** = -19.5 (*c* = 1.10, CHCl<sub>3</sub>);

**ν<sub>max</sub>** (thin film/cm<sup>-1</sup>): 1049, 1078, 1169, 1237, 1287, 1336, 1355, 1397, 1440, 1495, 1567, 1585, 2853, 2925, 2961, 3029, 3063, 3430;

**<sup>1</sup>H NMR** (400 MHz, CDCl<sub>3</sub>) δ 8.17 (ddd, *J* = 4.8, 1.7, 1.0 Hz, 1H), 7.64 – 7.46 (m, 2H), 7.36 – 7.28 (m, 2H), 7.24 – 7.19 (m, 3H), 7.12 (t, *J* = 7.7 Hz, 1H), 7.06 (ddd, *J* = 7.3, 4.8, 1.5 Hz, 1H), 6.97 (dd, *J* = 7.8, 1.6 Hz, 1H), 6.91 (dd, *J* = 7.5, 1.5 Hz, 1H), 5.11 (d, *J* = 13.7 Hz, 1H), 4.83 (d, *J* = 13.7 Hz, 1H), 3.63 (t, *J* = 6.6 Hz, 2H), 2.95 (hept, *J* = 6.7 Hz, 1H), 2.20 (ddt, *J* = 11.5, 6.4, 3.9 Hz, 1H), 2.08 (ddd, *J* = 14.9, 11.2, 4.4 Hz, 1H), 1.56 (dq, *J* = 8.1, 6.5 Hz, 2H), 1.40 – 1.04 (m, 14H), 0.83 (d, *J* = 6.7 Hz, 6H);

**<sup>13</sup>C NMR** (100 MHz, CDCl<sub>3</sub>) δ 168.9 (C<sub>q</sub>), 153.7 (C<sub>q</sub>), 147.7 (CH), 146.4 (C<sub>q</sub>), 140.5 (C<sub>q</sub>), 138.6 (C<sub>q</sub>), 136.8 (C<sub>q</sub>), 135.9 (CH), 130.4 (CH), 128.4 (CH), 127.9 (CH), 127.8 (CH), 125.9 (CH), 124.3 (CH), 124.2 (CH), 123.8 (CH), 63.2 (CH<sub>2</sub>), 54.5 (CH<sub>2</sub>), 32.9 (CH<sub>2</sub>), 31.1 (CH<sub>2</sub>), 30.0 (CH<sub>2</sub>), 29.8 (CH<sub>2</sub>), 29.7 (CH<sub>2</sub>), 29.6 (CH<sub>2</sub>), 29.5 (CH<sub>2</sub>), 29.5 (CH<sub>2</sub>), 28.6 (CH), 25.9 (CH<sub>2</sub>), 24.5 (CH<sub>3</sub>), 23.8 (CH<sub>3</sub>);

**R<sub>t</sub>** (IC-3 column, Hex/IPA 70/30, 1.0 mL/min, 280 nm): *t<sub>r</sub>*(major) = 10.5 min, *t<sub>r</sub>*(minor) = 9.3 min, 84% ee.

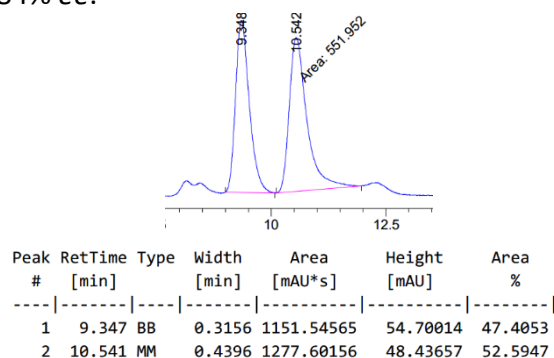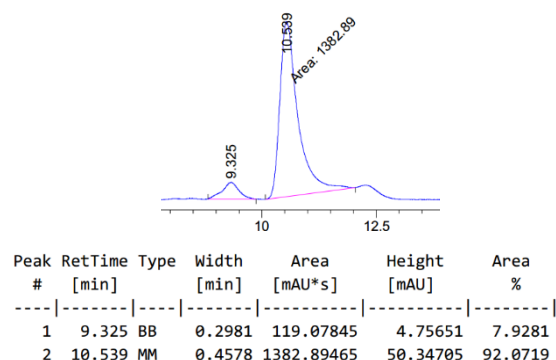

**Tert-butyl (E)-3-(2-(N-(4-fluorobenzyl)picolinamido)-3-isopropylphenyl)acrylate 3ba**

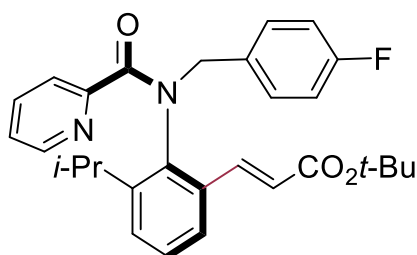

Prepared according to general procedure **A** on a 0.5 mmol scale, column chromatography (*n*-hexane/EtOAc = 7:3) afforded the title compound as yellow oil (156 mg, 0.33 mmol, 66%), with an enantiomeric ratio of 94/6.

**HRMS** (ESI) calcd for C<sub>29</sub>H<sub>32</sub>FN<sub>2</sub>O<sub>3</sub><sup>+</sup>: 475.2391. Found: 475.2389;

**[α]<sub>D</sub><sup>20</sup>** = -92.4 (*c* = 1.12, CHCl<sub>3</sub>);

**ν<sub>max</sub>** (thin film/cm<sup>-1</sup>): 1048, 1094, 1144, 1220, 1284, 13165, 1390, 1446, 1509, 1568, 1586, 1642, 1704, 2870, 2931, 2968, 3062;

**<sup>1</sup>H NMR** (400 MHz, CDCl<sub>3</sub>) δ 8.05 (ddd, *J* = 4.7, 1.8, 0.9 Hz, 1H), 7.64 (dt, *J* = 7.9, 1.1 Hz, 1H), 7.51 (td, *J* = 7.7, 1.7 Hz, 1H), 7.24 (d, *J* = 15.9 Hz, 1H), 7.21 – 7.13 (m, 5H), 7.00 (ddd, *J* = 7.6, 4.8, 1.2 Hz, 1H), 6.87 – 6.81 (m, 2H), 5.87 (d, *J* = 15.8 Hz, 1H), 5.26 (d, *J* = 13.7 Hz, 1H), 4.55 (d, *J* = 13.7 Hz, 1H), 2.97 (hept, *J* = 6.8 Hz, 1H), 1.46 (s, 9H), 0.90 (d, *J* = 6.8 Hz, 3H), 0.82 (d, *J* = 6.8 Hz, 3H).

**<sup>13</sup>C NMR** (101 MHz, CDCl<sub>3</sub>) δ 168.4 (C<sub>q</sub>), 165.6 (C<sub>q</sub>), 162.6 (d, *J* = 246.4 Hz, C<sub>q</sub>), 153.1 (C<sub>q</sub>), 147.5 (CH), 147.0 (C<sub>q</sub>), 140.3 (CH), 138.9 (C<sub>q</sub>), 136.0 (CH), 133.3 (C<sub>q</sub>), 132.2 (d, *J* = 8.2 Hz, CH), 131.8 (d, *J* = 3.2 Hz, C<sub>q</sub>), 128.5 (CH), 128.2 (CH), 124.4 (CH), 124.2 (CH), 124.1 (CH), 115.2 (d, *J* = 21.3 Hz, CH), 80.3 (C<sub>q</sub>), 53.7 (CH<sub>2</sub>), 29.3 (CH), 28.2 (CH<sub>3</sub>), 24.3 (CH<sub>3</sub>), 23.5 (CH<sub>3</sub>).

**R<sub>t</sub>** (AS-3 column, Hex/IPA 95/5, 1.0 mL/min, 273 nm): *t<sub>r</sub>*(major) = 7.0 min, *t<sub>r</sub>*(minor) = 14.3 min, 88% *ee*.

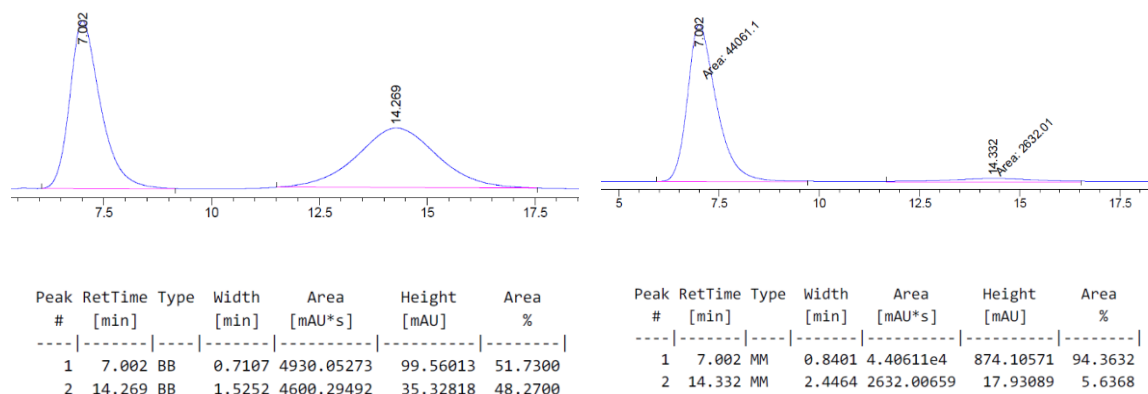

***Tert*-butyl (E)-3-(3-isopropyl-2-(N-(4-methylbenzyl)picolinamido)phenyl)acrylate 3ca**

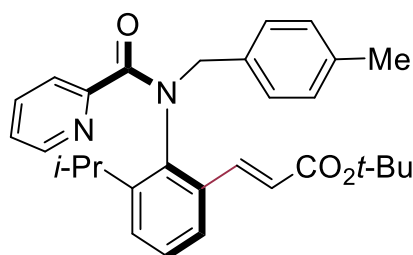

Prepared according to general procedure **A** on a 0.5 mmol scale, column chromatography (*n*-hexane/EtOAc = 7:3) afforded the title compound as yellow oil (207 mg, 0.44 mmol, 88%), with an enantiomeric ratio of 97/3.

**HRMS** (ESI) calcd for C<sub>30</sub>H<sub>35</sub>N<sub>2</sub>O<sub>3</sub><sup>+</sup>: 471.2642. Found: 471.2641;

**[α]<sub>D</sub><sup>20</sup>** = -70.4 (*c* = 1.00, CHCl<sub>3</sub>);

**ν<sub>max</sub>** (thin film/cm<sup>-1</sup>): 1050, 1144, 1232, 1258, 1366, 1390, 1446, 1472, 1514, 1567, 1586, 1643, 1703, 2869, 2929, 2967, 3057;

**<sup>1</sup>H NMR** (400 MHz, CDCl<sub>3</sub>) δ 8.09 (ddd, *J* = 4.7, 1.8, 1.0 Hz, 1H), 7.64 (dt, *J* = 7.9, 1.1 Hz, 1H), 7.53 (td, *J* = 7.7, 1.8 Hz, 1H), 7.30 – 7.24 (m, 1H), 7.21 – 7.15 (m, 3H), 7.11 – 7.08 (m, 2H), 7.03 (ddd, *J* = 7.6, 4.8, 1.2 Hz, 1H), 7.00 – 6.96 (m, 2H), 5.87 (d, *J* = 15.9 Hz, 1H), 5.22 (d, *J* = 13.7 Hz, 1H), 4.64 (d, *J* = 13.7 Hz, 1H), 3.01 (hept, *J* = 6.7 Hz, 1H), 2.25 (s, 3H), 1.49 (s, 9H), 0.89 (d, *J* = 6.7 Hz, 3H), 0.84 (d, *J* = 6.7 Hz, 3H) ;

**<sup>13</sup>C NMR** (101 MHz, CDCl<sub>3</sub>) δ 168.4 (C<sub>q</sub>), 165.7 (C<sub>q</sub>), 153.4 (C<sub>q</sub>), 147.5 (CH), 147.2 (C<sub>q</sub>), 140.5 (CH), 139.0 (C<sub>q</sub>), 137.5 (C<sub>q</sub>), 136.0 (CH), 133.4 (C<sub>q</sub>), 132.8 (C<sub>q</sub>), 130.5 (CH), 129.0 (CH), 128.4 (CH), 128.1 (CH), 124.3 (CH), 124.2 (CH), 124.0 (CH), 121.5 (CH), 80.3 (C<sub>q</sub>), 54.1 (CH<sub>2</sub>), 28.3 (CH), 28.2 (CH<sub>3</sub>), 24.2 (CH<sub>3</sub>), 23.6 (CH<sub>3</sub>), 21.2 (CH<sub>3</sub>);

**R<sub>t</sub>** (AS-3 column, Hex/IPA 95/5, 1.0 mL/min, 273 nm): *t<sub>r</sub>*(major) = 6.2 min, *t<sub>r</sub>*(minor) = 10.7 min, 94% *ee*.

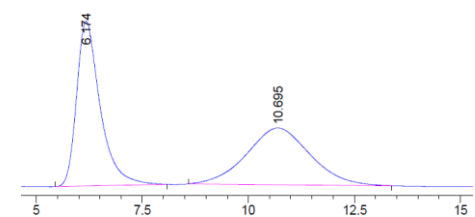

| Peak # | RetTime [min] | Type | Width [min] | Area [mAU*s] | Height [mAU] | Area %  |
|--------|---------------|------|-------------|--------------|--------------|---------|
| 1      | 6.174         | BB   | 0.5607      | 1742.09827   | 44.99779     | 52.0161 |
| 2      | 10.695        | BB   | 1.2170      | 1607.05322   | 15.44391     | 47.9839 |

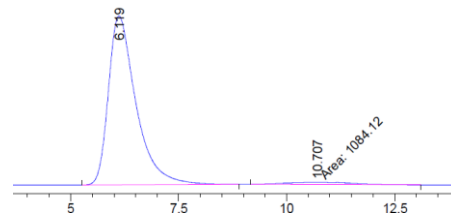

| Peak # | RetTime [min] | Type | Width [min] | Area [mAU*s] | Height [mAU] | Area %  |
|--------|---------------|------|-------------|--------------|--------------|---------|
| 1      | 6.119         | BB   | 0.6633      | 3.79304e4    | 853.74976    | 97.2212 |
| 2      | 10.707        | MM   | 1.6740      | 1084.12292   | 10.79376     | 2.7788  |

**Tert-butyl (E)-3-(3-isopropyl-2-(N-(4-methylbenzyl)picolinamido)phenyl)acrylate 3da**

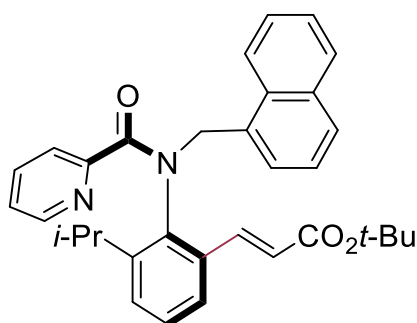

Prepared according to general procedure **A** on a 0.5 mmol scale, column chromatography (*n*-hexane/EtOAc = 7:3) afforded the title compound as white solid (202 mg, 0.40 mmol, 80%), with an enantiomeric ratio of 97/3.

**HRMS** (ESI) calcd for  $C_{33}H_{35}N_2O_3^+$ : 507.2642. Found: 507.2644;

$[\alpha]_{20}^D = -54.5$  ( $c = 1.05$ ,  $CHCl_3$ );

$\nu_{max}$  (thin film/ $cm^{-1}$ ): 1050, 11487, 1233, 1258, 1289, 1365, 1393, 1445, 1472, 1568, 1585, 1638, 1704, 2869, 2931, 2967, 3060;

**$^1H$  NMR** (400 MHz,  $CDCl_3$ )  $\delta$  8.12 (ddd,  $J = 4.8, 1.8, 0.9$  Hz, 1H), 7.77 – 7.73 (m, 1H), 7.73 – 7.66 (m, 3H), 7.59 (s, 1H), 7.56 – 7.50 (m, 2H), 7.43 – 7.37 (m, 3H), 7.24 – 7.22 (m, 1H), 7.19 (t,  $J = 7.5$  Hz, 1H), 7.16 (dd,  $J = 7.7, 1.9$  Hz, 1H), 7.05 (ddd,  $J = 7.6, 4.8, 1.2$  Hz, 1H), 5.88 (d,  $J = 15.9$  Hz, 1H), 5.29 (d,  $J = 13.7$  Hz, 1H), 4.99 (d,  $J = 13.7$  Hz, 1H), 2.99 (hept,  $J = 6.8$  Hz, 1H), 1.39 (s, 9H), 0.78 (d,  $J = 6.8$  Hz, 3H), 0.73 (d,  $J = 6.8$  Hz, 3H);

**$^{13}C$  NMR** (101 MHz,  $CDCl_3$ )  $\delta$  168.6 ( $C_q$ ), 165.7 ( $C_q$ ), 153.4 ( $C_q$ ), 147.7 (CH), 147.2 ( $C_q$ ), 140.5 (CH), 139.3 ( $C_q$ ), 136.1 (CH), 133.5 ( $C_q$ ), 133.3 ( $C_q$ ), 133.3 ( $C_q$ ), 133.1 ( $C_q$ ), 129.6 (CH), 128.6 (CH), 128.5 (CH), 128.2 (CH), 128.1 (CH), 127.7 (CH), 126.0 (CH), 126.0 (CH), 124.4 (CH), 124.4 (CH), 124.3 (CH), 121.8 (CH), 80.3 ( $C_q$ ), 54.9 ( $CH_2$ ), 28.3 (CH), 28.2 ( $CH_3$ ), 24.2 ( $CH_3$ ), 23.6 ( $CH_3$ );

**$R_t$**  (AS-3 column, Hex/IPA 95/5, 1.0 mL/min, 273 nm):  $t_r$ (major) = 7.7 min,  $t_r$ (minor) = 12.9 min, 94% *ee*.

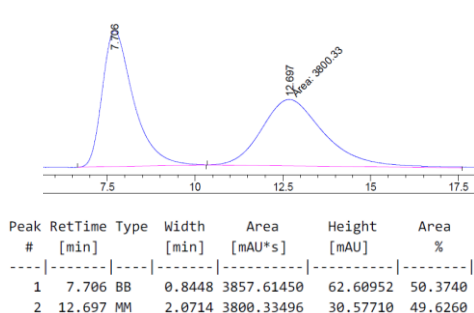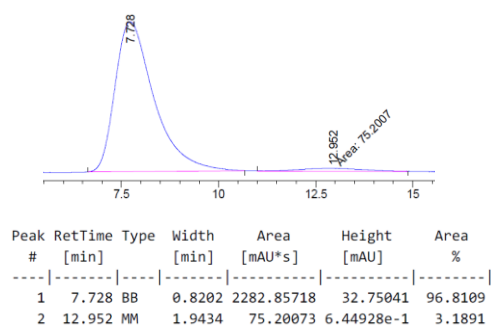

***Tert*-butyl (E)-3-(2-(*N*-butylpicolinamido)-3-isopropylphenyl)acrylate 3ea**

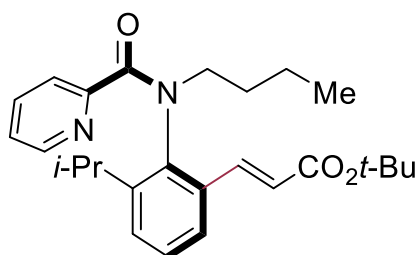

Prepared according to general procedure **A** on a 0.5 mmol scale, column chromatography (*n*-hexane/EtOAc = 7:3) afforded the title compound as yellow oil (192 mg, 0.45 mmol, 91%), with an enantiomeric ratio of 96/4.

**HRMS** (ESI) calcd for  $C_{26}H_{35}N_2O_3^+$ : 423.2642. Found: 423.2643;

$[\alpha]_{20}^D = -159.6$  ( $c = 1.08$ ,  $CHCl_3$ );

$\nu_{max}$  (thin film/ $cm^{-1}$ ): 1046, 1099, 1149, 1231, 1258, 1321, 1367, 1393, 1446, 1473, 1567, 1586, 1649, 1705, 2870, 2963, 3065;

**$^1H$  NMR** (400 MHz,  $CDCl_3$ )  $\delta$  8.06 (ddd,  $J = 4.8, 1.8, 1.0$  Hz, 1H), 7.84 – 7.78 (m, 1H), 7.61 (dt,  $J = 7.8, 1.1$  Hz, 1H), 7.57 – 7.49 (m, 1H), 7.32 – 7.28 (m, 1H), 7.23 – 7.14 (m, 2H), 7.01 (ddd,  $J = 7.6, 4.8, 1.3$  Hz, 1H), 6.13 (d,  $J = 15.9$  Hz, 1H), 3.94 (ddd,  $J = 13.1, 11.1, 5.3$  Hz, 1H), 3.54 – 3.42 (m, 1H), 3.08 (hept,  $J = 6.8$  Hz, 1H), 1.78 – 1.55 (m, 2H), 1.51 (s, 9H), 1.40 – 1.30 (m, 2H), 1.19 (d,  $J = 6.8$  Hz, 3H), 0.89 (t,  $J = 7.4$  Hz, 3H), 0.86 (d,  $J = 6.8$  Hz, 3H).

**$^{13}C$  NMR** (101 MHz,  $CDCl_3$ )  $\delta$  168.4 ( $C_q$ ), 165.9 ( $C_q$ ), 153.6 ( $C_q$ ), 147.5 (CH), 147.1 ( $C_q$ ), 141.0 (CH), 140.5 ( $C_q$ ), 136.0 (CH), 133.2 ( $C_q$ ), 128.5 (CH), 127.9 (CH), 124.2 (CH), 124.1 (CH), 123.9 (CH), 122.1 (CH), 80.6 ( $C_q$ ), 52.0 ( $CH_2$ ), 29.1 ( $CH_2$ ), 28.3 ( $CH_3$ ), 28.1 (CH), 24.8 ( $CH_3$ ), 23.4 ( $CH_3$ ), 20.7 ( $CH_2$ ), 13.9 ( $CH_3$ ).

**$R_t$**  (AD-3 column, Hex/IPA 90/10, 1.0 mL/min, 273 nm):  $t_r$ (major) = 7.2 min,  $t_r$ (minor) = 9.6 min, 92% *ee*.

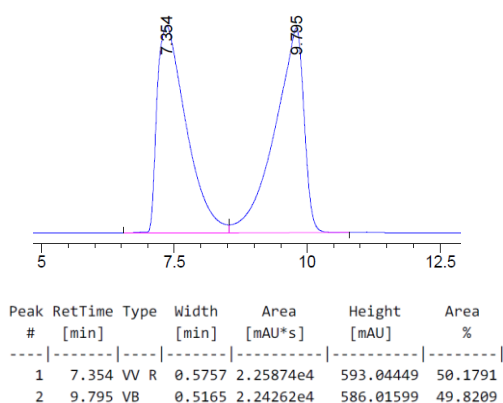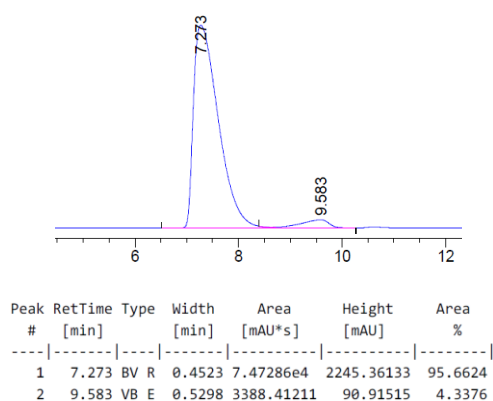

**Tert-butyl (E)-3-(2-(N-(cyclopropylmethyl)picolinamido)-3-isopropylphenyl)acrylate 3fa**

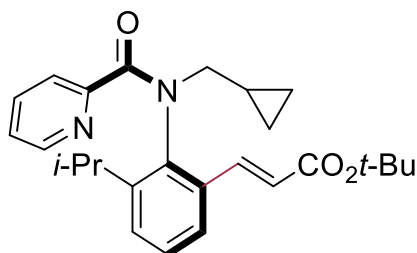

Prepared according to general procedure **A** on a 0.5 mmol scale, column chromatography (*n*-hexane/EtOAc = 7:3) afforded the title compound as yellow oil (176 mg, 0.42 mmol, 84%), with an enantiomeric ratio of 95.5/4.5.

**HRMS** (ESI) calcd for C<sub>26</sub>H<sub>33</sub>N<sub>2</sub>O<sub>3</sub><sup>+</sup>: 421.2486. Found: 421.2480;

**[α]<sub>D</sub><sup>20</sup>** = -97.7 (*c* = 0.90, CHCl<sub>3</sub>);

**ν<sub>max</sub>** (thin film/cm<sup>-1</sup>): 1023, 1052, 1141, 1247, 1296, 1317, 1367, 1392, 1446, 1472, 1567, 1586, 1631, 1704, 2872, 2977, 3062;

**<sup>1</sup>H NMR** (400 MHz, CDCl<sub>3</sub>) δ 8.09 (ddd, *J* = 4.8, 1.8, 1.0 Hz, 1H), 7.99 (d, *J* = 16.0 Hz, 1H), 7.63 (dt, *J* = 7.9, 1.1 Hz, 1H), 7.54 (td, *J* = 7.7, 1.8 Hz, 1H), 7.33 – 7.28 (m, 1H), 7.25 – 7.16 (m, 2H), 7.04 (ddd, *J* = 7.5, 4.8, 1.3 Hz, 1H), 6.10 (d, *J* = 16.0 Hz, 1H), 4.22 (dd, *J* = 13.7, 7.1 Hz, 1H), 3.11 – 3.23 (m, 2H), 1.53 (s, 9H), 1.22 (d, *J* = 6.8 Hz, 3H), 1.12 – 1.03 (m, 1H), 0.98 (d, *J* = 6.8 Hz, 3H), 0.56 – 0.39 (m, 2H), 0.38 – 0.30 (m, 1H), 0.15 (dtd, *J* = 9.3, 5.4, 4.2 Hz, 1H).

**<sup>13</sup>C NMR** (101 MHz, CDCl<sub>3</sub>) δ 168.7 (C<sub>q</sub>), 166.1 (C<sub>q</sub>), 153.8 (C<sub>q</sub>), 147.5 (CH), 147.3 (C<sub>q</sub>), 141.3 (CH), 140.2 (C<sub>q</sub>), 136.0 (CH), 133.5 (C<sub>q</sub>), 128.6 (CH), 128.1 (CH), 124.2 (CH), 124.1 (CH), 123.9 (CH), 121.7 (CH), 80.6 (C<sub>q</sub>), 55.8 (CH<sub>2</sub>), 28.4 (CH<sub>3</sub>), 28.3 (CH<sub>3</sub>), 24.7 (CH), 23.7 (CH<sub>3</sub>), 9.3 (CH), 4.6 (CH<sub>2</sub>), 4.5 (CH<sub>2</sub>).

**R<sub>t</sub>** (AD-3 column, Hex/IPA 90/10, 1.0 mL/min, 273 nm): *t<sub>r</sub>*(major) = 8.9 min, *t<sub>r</sub>*(minor) = 10.8 min, 91% *ee*.

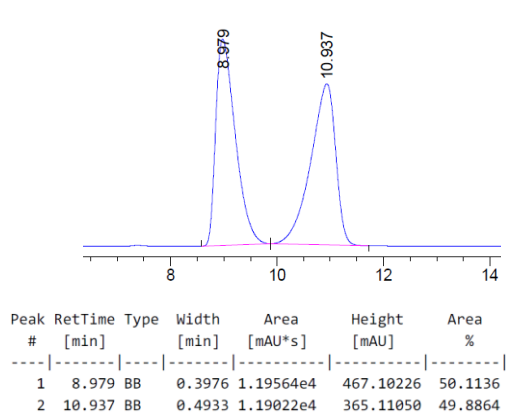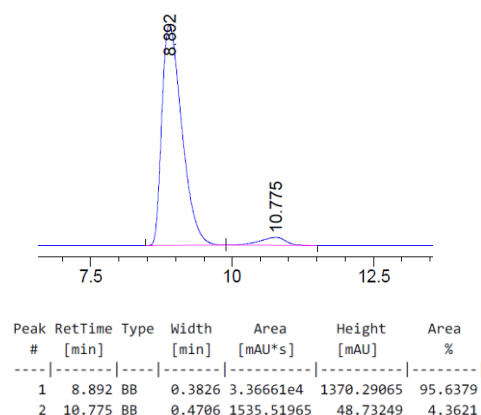

**Tert-butyl (E)-3-(3-isopropyl-2-(N-(3-methylbut-2-en-1-yl)picolinamido)phenyl)acrylate 3ga**

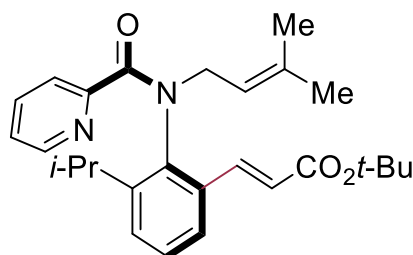

Prepared according to general procedure **A** on a 0.5 mmol scale, column chromatography (*n*-hexane/EtOAc = 7:3) afforded the title compound as yellow oil (139 mg, 0.32 mmol, 64%), with an enantiomeric ratio of 98.5/1.5.

**HRMS** (ESI) calcd for  $C_{27}H_{35}N_2O_3^+$ : 435.2642. Found: 435.2638;

$[\alpha]_{20}^D = -85.6$  ( $c = 1.00$ ,  $CHCl_3$ );

$\nu_{max}$  (thin film/ $cm^{-1}$ ): 1038, 1148, 1240, 1258, 1289, 1316, 1366, 1392, 1446, 1472, 1567, 1586, 1638, 1704, 2931, 2965, 3067;

**$^1H$  NMR** (400 MHz,  $CDCl_3$ )  $\delta$  8.09 (ddd,  $J = 4.8, 1.8, 1.0$  Hz, 1H), 7.77 (d,  $J = 16.0$  Hz, 1H), 7.61 (dt,  $J = 7.9, 1.1$  Hz, 1H), 7.53 (td,  $J = 7.7, 1.8$  Hz, 1H), 7.32 – 7.27 (m, 1H), 7.20 – 7.16 (m, 2H), 7.02 (ddd,  $J = 7.5, 4.8, 1.3$  Hz, 1H), 6.12 (d,  $J = 15.9$  Hz, 1H), 5.42 (tt,  $J = 7.6, 1.4$  Hz, 1H), 4.62 – 4.52 (m, 1H), 4.18 – 4.08 (m, 1H), 3.10 (hept,  $J = 6.8$  Hz, 1H), 1.61 (d,  $J = 1.3$  Hz, 3H), 1.51 (s, 9H), 1.50 (s, 3H), 1.16 (d,  $J = 6.8$  Hz, 3H), 0.84 (d,  $J = 6.8$  Hz, 3H).

**$^{13}C$  NMR** (101 MHz,  $CDCl_3$ )  $\delta$  168.2 ( $C_q$ ), 166.2 ( $C_q$ ), 153.4 ( $C_q$ ), 147.6 (CH), 147.1 ( $C_q$ ), 141.2 (CH), 139.9 ( $C_q$ ), 137.5 ( $C_q$ ), 136.0 (CH), 133.3 ( $C_q$ ), 128.3 (CH), 128.1 (CH), 124.2 (CH), 124.0 (CH), 124.0 (CH), 121.3 (CH), 118.2 (CH), 80.4 ( $C_q$ ), 49.0 ( $CH_2$ ), 28.3 ( $CH_3$ ), 28.2 (CH), 25.9 ( $CH_3$ ), 24.7 ( $CH_3$ ), 23.4 ( $CH_3$ ), 17.7 ( $CH_3$ ).

**$R_t$**  (AS-3 column, Hex/IPA 98/2, 1.0 mL/min, 273 nm):  $t_r$ (major) = 11.9 min,  $t_r$ (minor) = 18.1 min, 97% *ee*.

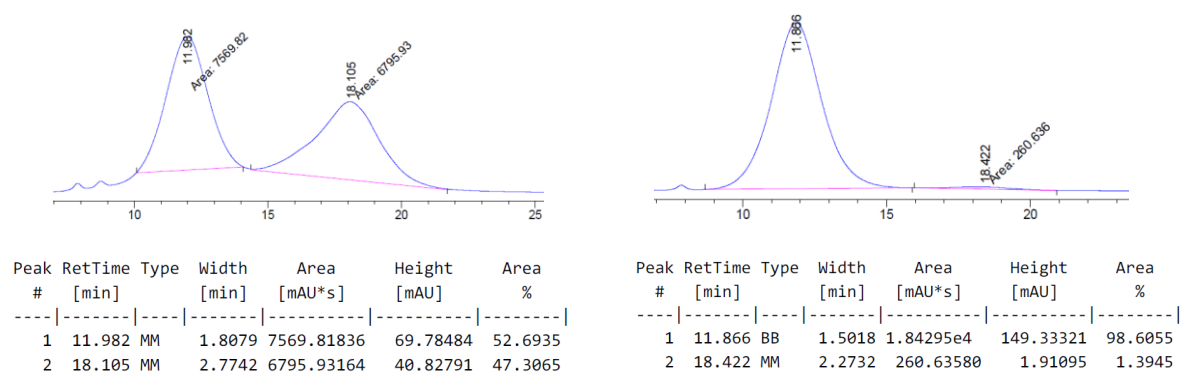

***Tert*-butyl (E)-3-(2-(*N*-(2-ethoxy-2-oxoethyl)picolinamido)-3-isopropylphenyl)acrylate 3ha**

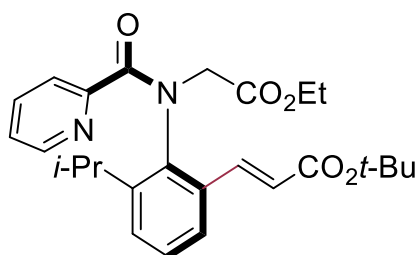

Prepared according to general procedure **A** on a 0.5 mmol scale, column chromatography (*n*-hexane/EtOAc = 7:3) afforded the title compound as yellow oil (86 mg, 0.19 mmol, 38%), with an enantiomeric ratio of 94/6.

**HRMS** (ESI) calcd for C<sub>26</sub>H<sub>33</sub>N<sub>2</sub>O<sub>5</sub><sup>+</sup>: 453.2384. Found: 453.2384;

**[α]<sub>D</sub><sup>20</sup>** = -94.2 (*c* = 1.00, CHCl<sub>3</sub>);

**ν<sub>max</sub>** (thin film/cm<sup>-1</sup>): 1039, 1146, 1196, 1238, 1258, 1320, 1367, 1442, 1473, 1568, 1586, 1650, 1704, 2870, 2932, 2971, 3063;

**<sup>1</sup>H NMR** (400 MHz, CDCl<sub>3</sub>) δ 8.14 – 8.07 (m, 2H), 7.75 (dt, *J* = 7.9, 1.0 Hz, 1H), 7.59 (td, *J* = 7.7, 1.7 Hz, 1H), 7.32 – 7.29 (m, 1H), 7.24 – 7.18 (m, 2H), 7.12 – 7.06 (m, 1H), 6.08 (d, *J* = 15.9 Hz, 1H), 4.37 (d, *J* = 16.4 Hz, 1H), 4.30 – 4.21 (m, 3H), 3.32 (hept, *J* = 6.8 Hz, 1H), 1.53 (s, 9H), 1.31 – 1.27 (m, 3H), 1.18 (d, *J* = 6.7 Hz, 3H), 0.88 (d, *J* = 6.7 Hz, 3H).

**<sup>13</sup>C NMR** (101 MHz, CDCl<sub>3</sub>) δ 168.8 (C<sub>q</sub>), 168.0 (C<sub>q</sub>), 165.9 (C<sub>q</sub>), 152.4 (C<sub>q</sub>), 147.6 (CH), 147.1 (C<sub>q</sub>), 141.0 (CH), 140.8 (C<sub>q</sub>), 136.1 (CH), 133.4 (C<sub>q</sub>), 128.5 (CH), 128.4 (CH), 124.7 (CH), 124.5 (CH), 122.8 (CH), 80.4 (C<sub>q</sub>), 61.4 (CH<sub>2</sub>), 54.1 (CH<sub>2</sub>), 28.4 (CH<sub>3</sub>), 28.3 (CH), 25.0 (CH<sub>3</sub>), 23.2 (CH<sub>3</sub>), 14.3 (CH<sub>3</sub>).

**R<sub>t</sub>** (AS-3 column, Hex/IPA 95/5, 1.2 mL/min, 273 nm): *t<sub>r</sub>*(major) = 11.0 min, *t<sub>r</sub>*(minor) = 18.7 min, 88% *ee*.

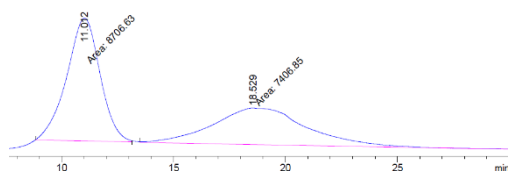

| Peak # | RetTime [min] | Type | Width [min] | Area [mAU*s] | Height [mAU] | Area %  |
|--------|---------------|------|-------------|--------------|--------------|---------|
| 1      | 11.012        | MM   | 1.7245      | 8706.63086   | 84.14453     | 54.0332 |
| 2      | 18.529        | MM   | 4.9100      | 7406.84912   | 25.14221     | 45.9668 |

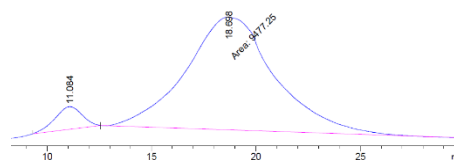

| Peak # | RetTime [min] | Type | Width [min] | Area [mAU*s] | Height [mAU] | Area %  |
|--------|---------------|------|-------------|--------------|--------------|---------|
| 1      | 11.084        | BB   | 1.0559      | 572.49786    | 6.36179      | 5.6966  |
| 2      | 18.698        | MM   | 4.9601      | 9477.24707   | 31.84527     | 94.3034 |



**Tert-butyl 3-(1-(*N*-benzylpicolinamido)naphthalen-2-yl)acrylate 3ia**

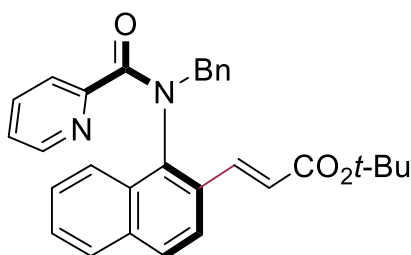

Prepared according to general procedure **A** on a 0.5 mmol scale, column chromatography (*n*-hexane/EtOAc = 8:2 to 7:3) afforded the title compound as white foam (151 mg, 0.33 mmol, 65%), with an enantiomeric ratio of 94/6.

**HRMS** (ESI) calcd for C<sub>30</sub>H<sub>29</sub>N<sub>2</sub>O<sub>3</sub><sup>+</sup>: 465.2173. Found: 465.2174;

**[α]<sub>D</sub><sup>20</sup>** = +16.9 (*c* = 0.94, CHCl<sub>3</sub>);

**ν<sub>max</sub>** (thin film/cm<sup>-1</sup>): 1077, 1144, 1239, 1256, 1293, 1334, 1367, 1402, 1438, 1471, 1567, 1586, 1645, 1702, 2249, 2932, 2977, 3063;

**<sup>1</sup>H NMR** (400 MHz, CDCl<sub>3</sub>) δ 7.92 – 7.88 (m, 2H), 7.78 – 7.74 (m, 1H), 7.66 (d, *J* = 8.7 Hz, 1H), 7.55 (d, *J* = 7.8 Hz, 1H), 7.50 – 7.46 (m, 2H), 7.43 (dt, *J* = 7.7, 1.7 Hz, 1H), 7.39 (d, *J* = 8.7 Hz, 1H), 7.33 (d, *J* = 15.9 Hz, 1H), 7.19 – 7.12 (m, 5H), 6.91 (ddd, *J* = 7.6, 4.8, 1.2 Hz, 1H), 5.95 (d, *J* = 15.9 Hz, 1H), 5.65 (d, *J* = 13.5 Hz, 1H), 4.67 (d, *J* = 13.5 Hz, 1H), 1.52 (s, 9H);

**<sup>13</sup>C NMR** (100 MHz, CDCl<sub>3</sub>) δ 168.9 (C<sub>q</sub>), 165.6 (C<sub>q</sub>), 153.4 (C<sub>q</sub>), 147.7 (CH), 139.1 (CH), 138.2 (C<sub>q</sub>), 135.9 (CH), 135.8 (C<sub>q</sub>), 134.8 (C<sub>q</sub>), 131.0 (C<sub>q</sub>), 130.7 (C<sub>q</sub>), 130.6 (CH), 128.5 (CH), 128.4 (CH), 128.2 (CH), 128.0 (CH), 127.5 (CH), 127.1 (CH), 124.6 (CH), 124.2 (CH), 123.4 (CH), 122.8 (CH), 122.2 (CH), 80.5 (C<sub>q</sub>), 54.1 (CH<sub>2</sub>), 28.3 (CH<sub>3</sub>);

**R<sub>t</sub>** (AS-3 column, Hex/IPA 80/20, 1.0 mL/min, 273 nm): *t<sub>r</sub>*(major) = 6.5 min, *t<sub>r</sub>*(minor) = 8.1 min, 88% *ee*.

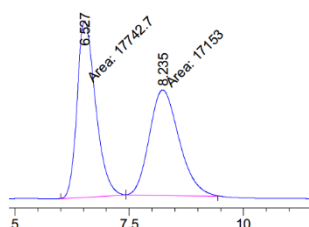

| Peak # | RetTime [min] | Type | Width [min] | Area [mAU*s] | Height [mAU] | Area %  |
|--------|---------------|------|-------------|--------------|--------------|---------|
| 1      | 6.527         | MM   | 0.4682      | 1.77427e4    | 631.57837    | 50.8449 |
| 2      | 8.235         | MM   | 0.7564      | 1.71530e4    | 377.95755    | 49.1551 |

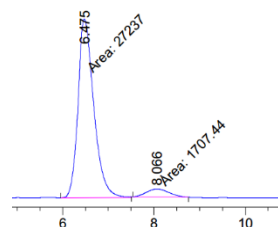

| Peak # | RetTime [min] | Type | Width [min] | Area [mAU*s] | Height [mAU] | Area %  |
|--------|---------------|------|-------------|--------------|--------------|---------|
| 1      | 6.475         | MM   | 0.3998      | 2.72370e4    | 1135.49670   | 94.1010 |
| 2      | 8.066         | MM   | 0.5643      | 1707.43677   | 50.43094     | 5.8990  |

**Tert-butyl 3-(3-(*N*-benzylpicolinamido)-3-isopropylphenyl)acrylate 3ja**

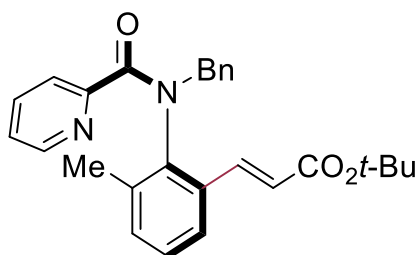

Prepared according to general procedure **A** on a 0.5 mmol scale, column chromatography (*n*-hexane/acetone = 9:1) afforded the title compound as colorless oil (111 mg, 0.26 mmol, 52%), with an enantiomeric ratio of 95/5.

**HRMS** (ESI) calcd for  $C_{27}H_{29}N_2O_3^+$ : 429.2173. Found: 429.2174;

$[\alpha]_{20}^D = -124.1$  ( $c = 0.96$ ,  $CHCl_3$ );

$\nu_{max}$  (thin film/ $cm^{-1}$ ): 1079, 1149, 1236, 1280, 1319, 1367, 1390, 1439, 1455, 1470, 1568, 1586, 1645, 1705, 2932, 2977, 3065;

**$^1H$  NMR** (400 MHz,  $CDCl_3$ )  $\delta$  8.14 (dt,  $J = 4.9, 1.4$  Hz, 1H), 7.57 – 7.49 (m, 2H), 7.41 (d,  $J = 15.9$  Hz, 1H), 7.25 – 7.19 (m, 6H), 7.12 – 7.01 (m, 3H), 5.99 (d,  $J = 15.9$  Hz, 1H), 5.02 (d,  $J = 13.5$  Hz, 1H), 4.87 (d,  $J = 13.5$  Hz, 1H), 1.91 (s, 3H), 1.51 (s, 9H);

**$^{13}C$  NMR** (100 MHz,  $CDCl_3$ )  $\delta$  168.3 ( $C_q$ ), 165.8 ( $C_q$ ), 153.8 ( $C_q$ ), 147.9 (CH), 140.3 ( $C_q$ ), 139.8 (CH), 137.5 ( $C_q$ ), 136.0 (CH), 135.8 ( $C_q$ ), 133.5 ( $C_q$ ), 132.2 (CH), 130.6 (CH), 128.4 (CH), 128.0 (CH), 127.9 (CH), 124.6 (CH), 124.3 (CH), 123.4 (CH), 122.0 (CH), 80.5 (CH), 53.4 ( $CH_2$ ), 28.3 ( $CH_3$ ), 18.3 ( $CH_3$ );

**$R_t$**  (AS-3 column, Hex/IPA 98/02, 1.0 mL/min, 250 nm):  $t_r$ (major) = 15.8 min,  $t_r$ (minor) = 19.8 min, 90% *ee*.

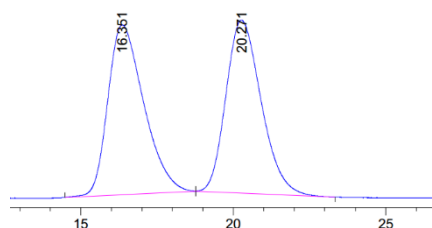

| Peak # | RetTime [min] | Type | Width [min] | Area [mAU*s] | Height [mAU] | Area %  |
|--------|---------------|------|-------------|--------------|--------------|---------|
| 1      | 16.351        | BB   | 1.0490      | 8312.98340   | 101.76756    | 49.9236 |
| 2      | 20.271        | BB   | 1.0036      | 8338.42578   | 103.64001    | 50.0764 |

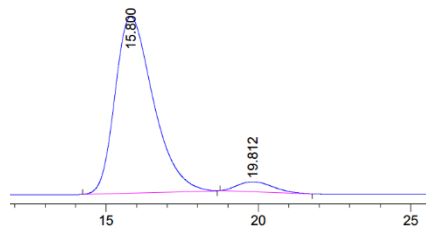

| Peak # | RetTime [min] | Type | Width [min] | Area [mAU*s] | Height [mAU] | Area %  |
|--------|---------------|------|-------------|--------------|--------------|---------|
| 1      | 15.800        | BB   | 1.0702      | 8956.17773   | 102.72366    | 95.0052 |
| 2      | 19.812        | BB   | 0.9470      | 470.86591    | 5.83170      | 4.9948  |

**Tert-butyl (E)-3-(2-(N-benzyl-5-fluoropicolinamido)-3-isopropylphenyl)acrylate 3ka**

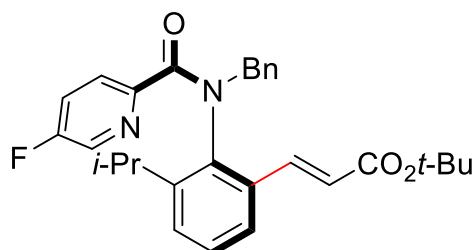

Prepared according to general procedure **A** on a 0.5 mmol scale, column chromatography (*n*-hexane/acetone = 9:1) afforded the title compound as a colorless foam (121 mg, 0.26 mmol, 51%), with an enantiomeric ratio of 97.5/2.5.

**HRMS** (ESI) calcd for C<sub>29</sub>H<sub>32</sub>N<sub>2</sub>O<sub>3</sub>F<sup>+</sup>: 475.2391. Found: 475.2383;

**[α]<sub>D</sub><sup>20</sup>** = -63.0 (*c* = 0.67, CH<sub>2</sub>Cl<sub>2</sub>);

**ν<sub>max</sub>** (thin film/cm<sup>-1</sup>): 981, 1147, 1228, 1287, 1315, 1367, 1404, 1446, 1481, 1583, 1643, 1705, 2967;

**<sup>1</sup>H NMR** (400 MHz, CDCl<sub>3</sub>) δ 7.84 (dd, *J* = 2.9, 0.6 Hz, 1H), 7.72 (ddd, *J* = 8.7, 4.4, 0.6 Hz, 1H), 7.21 – 7.16 (m, 2H), 7.16 – 7.09 (m, 8H), 5.82 (d, *J* = 15.9 Hz, 1H), 5.16 (d, *J* = 13.6 Hz, 1H), 4.62 (d, *J* = 13.6 Hz, 1H), 2.90 (hept, *J* = 6.8 Hz, 1H), 1.42 (s, 9H), 0.80 (d, *J* = 6.8 Hz, 3H), 0.76 (d, *J* = 6.8 Hz, 3H);

**<sup>13</sup>C NMR** (100 MHz, CDCl<sub>3</sub>) δ 167.3 (C<sub>q</sub>), 165.7 (C<sub>q</sub>), 159.4 (d, *J* = 261.0 Hz, C<sub>q</sub>), 149.5 (d, *J* = 4.4 Hz, C<sub>q</sub>), 147.0 (C<sub>q</sub>), 140.3 (CH), 139.0 (C<sub>q</sub>), 135.7 (d, *J* = 23.6 Hz, CH), 135.7 (C<sub>q</sub>), 133.4 (C<sub>q</sub>), 130.6 (CH), 128.5 (CH), 128.5 (CH), 128.2 (CH), 128.0 (CH), 126.2 (d, *J* = 4.9 Hz, CH), 124.2 (CH), 122.9 (d, *J* = 18.5 Hz, CH), 121.7 (CH), 80.3 (C<sub>q</sub>), 54.6 (CH<sub>2</sub>), 28.3 (CH<sub>3</sub>), 24.1 (CH), 23.6 (CH<sub>3</sub>);

**<sup>19</sup>F NMR** (282 MHz) δ -123.58 (dd, *J* = 8.5, 4.3 Hz);

**R<sub>t</sub>** (AS-3 column, Hex/IPA 95/5, 1.0 mL/min, 273 nm): *t<sub>r</sub>*(major) = 5.5 min, *t<sub>r</sub>*(minor) = 9.1 min, 95% *ee*.

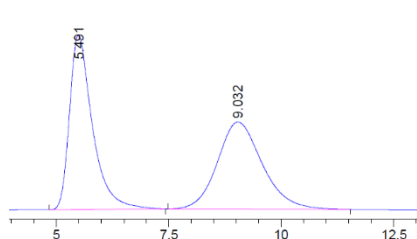

| Peak # | RetTime [min] | Type | Width [min] | Area [mAU*s] | Height [mAU] | Area %  |
|--------|---------------|------|-------------|--------------|--------------|---------|
| 1      | 5.491         | BB   | 0.5137      | 1.58460e4    | 446.84735    | 50.5577 |
| 2      | 9.032         | BB   | 0.8302      | 1.54965e4    | 222.87575    | 49.4423 |

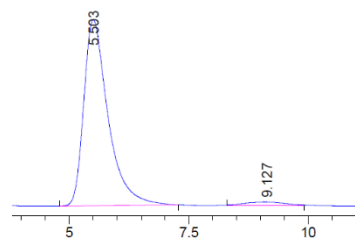

| Peak # | RetTime [min] | Type | Width [min] | Area [mAU*s] | Height [mAU] | Area %  |
|--------|---------------|------|-------------|--------------|--------------|---------|
| 1      | 5.503         | BB   | 0.5108      | 6855.15479   | 193.74458    | 97.5609 |
| 2      | 9.127         | BB   | 0.6233      | 171.38557    | 3.24411      | 2.4391  |

**Tert-butyl (E)-3-(2-(N-benzyl-5-(trifluoromethyl)picolinamido)-3-isopropylphenyl)acrylate**  
**3la**

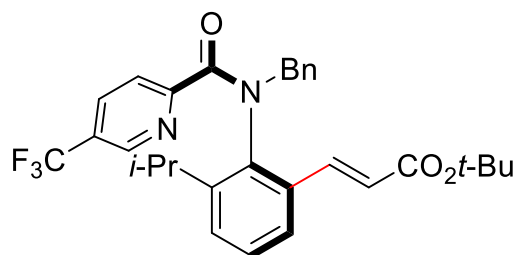

Prepared according to general procedure **A** on a 0.5 mmol scale, column chromatography (*n*-hexane/acetone = 9:1) afforded the title compound as a white solid (110 mg, 0.21 mmol, 42%), with an enantiomeric ratio of 95.5/4.5.

**HRMS** (ESI) calcd for  $C_{30}H_{32}N_2O_3F_3^+$ : 525.2360. Found: 525.2356;

$[\alpha]_D^{20}$  = -55.9 ( $c$  = 0.95,  $CH_2Cl_2$ );

$\nu_{max}$  (thin film/ $cm^{-1}$ ): 1017, 1076, 1134, 1290, 1322, 1367, 1407, 1446, 1571, 1647, 1707, 1871, 2932, 2969;

**$^1H$  NMR** (400 MHz,  $CDCl_3$ )  $\delta$  8.29 (dt,  $J$  = 2.1, 1.0 Hz, 1H), 7.82 – 7.71 (m, 2H), 7.18 – 7.09 (m, 9H), 5.80 (d,  $J$  = 15.9 Hz, 1H), 5.26 (d,  $J$  = 13.6 Hz, 1H), 4.58 (d,  $J$  = 13.6 Hz, 1H), 2.96 (hept,  $J$  = 6.8 Hz, 1H), 1.43 (s, 9H), 0.87 (d,  $J$  = 6.8 Hz, 3H), 0.83 (d,  $J$  = 6.8 Hz, 3H);

**$^{13}C$  NMR** (100 MHz,  $CDCl_3$ )  $\delta$  167.2 ( $C_q$ ), 165.6 ( $C_q$ ), 147.2 ( $C_q$ ), 147.2 ( $C_q$ ), 144.44 (q,  $J$  = 4.0 Hz, CH), 139.9 (CH), 138.4 ( $C_q$ ), 134.41 (d,  $J$  = 248.3 Hz,  $C_q$ ), 133.52 (q,  $J$  = 3.5 Hz, CH), 130.6 (CH), 128.7 (CH), 128.6 (CH), 128.6 (CH), 128.2 (CH), 126.9 (q,  $J$  = 33.2 Hz,  $C_q$ ), 124.3 (CH), 124.2 (CH), 122.1 ( $C_q$ ), 122.0 (CH), 80.5 ( $C_q$ ), 54.6 ( $CH_2$ ), 28.3 ( $CH_3$ ), 24.3 (CH), 23.7 ( $CH_3$ );

**$^{19}F$  NMR** (376 MHz)  $\delta$  -62.65;

**$R_t$**  (AS-3 column, Hex/IPA 98/2, 1.2 mL/min, 273 nm):  $t_r$ (major) = 4.6 min,  $t_r$ (minor) = 9.4 min, 91% ee.

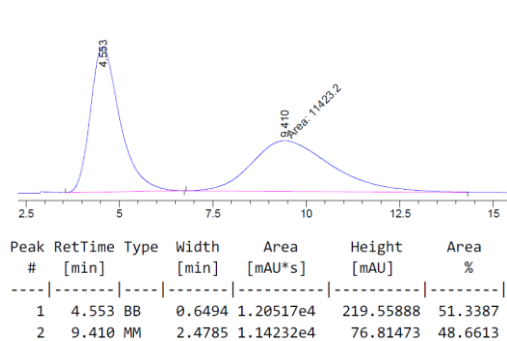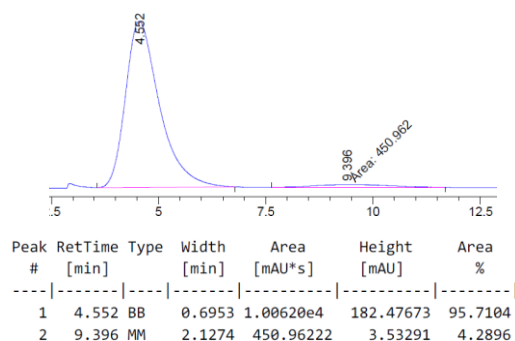

**Tert-butyl (E)-3-(2-(N-benzyl-5-methoxypicolinamido)-3-isopropylphenyl)acrylate 3ma**

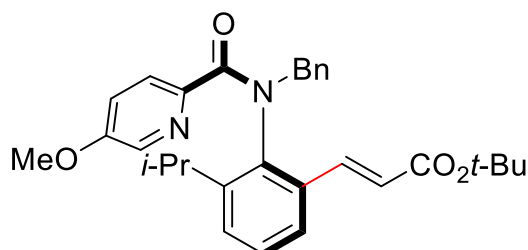

Prepared according to general procedure **A** on a 0.5 mmol scale, column chromatography (*n*-hexane/acetone = 9:1) afforded the title compound as a colorless foam (228 mg, 0.47 mmol, 94%), with an enantiomeric ratio of 96/4.

**HRMS** (ESI) calcd for  $C_{30}H_{35}N_2O_4^+$ : 487.2591. Found: 487.2582;

$[\alpha]_D^{20} = -113.4$  ( $c = 0.76$ ,  $CH_2Cl_2$ );

$\nu_{max}$  (thin film/ $cm^{-1}$ ): 1028, 1146, 1228, 1268, 1294, 1315, 1385, 1445, 1572, 1585, 1635, 1704, 2870, 2934, 2966;

**$^1H$  NMR** (400 MHz,  $CDCl_3$ )  $\delta$  7.77 – 7.70 (m, 2H), 7.33 (d,  $J = 15.9$  Hz, 1H), 7.25 – 7.09 (m, 8H), 7.02 (dd,  $J = 8.7, 2.9$  Hz, 1H), 5.92 (d,  $J = 15.9$  Hz, 1H), 5.14 (d,  $J = 13.6$  Hz, 1H), 4.76 (d,  $J = 13.6$  Hz, 1H), 3.73 (s, 3H), 2.93 (hept,  $J = 6.8$  Hz, 1H), 1.49 (s, 9H), 0.81 (d,  $J = 6.8$  Hz, 3H), 0.76 (d,  $J = 6.8$  Hz, 3H);

**$^{13}C$  NMR** (100 MHz,  $CDCl_3$ )  $\delta$  168.0 ( $C_q$ ), 165.8 ( $C_q$ ), 156.2 ( $C_q$ ), 146.9 ( $C_q$ ), 145.4 ( $C_q$ ), 140.7 (CH), 139.7 ( $C_q$ ), 136.1 ( $C_q$ ), 135.2 (CH), 133.3 ( $C_q$ ), 130.6 (CH), 128.4 (CH), 128.2 (CH), 127.9 (CH), 127.9 (CH), 125.7 (CH), 124.2 (CH), 121.5 (CH), 119.7 (CH), 80.3 ( $C_q$ ), 55.6 (CH), 54.6 ( $CH_2$ ), 28.3 ( $CH_3$ ), 24.0 ( $CH_3$ ), 23.6 ( $CH_3$ );

**$R_t$**  (AS-3 column, Hex/IPA 95/5, 1.0 mL/min, 273 nm):  $t_r$ (major) = 8.6 min,  $t_r$ (minor) = 13.4 min, 92% ee.

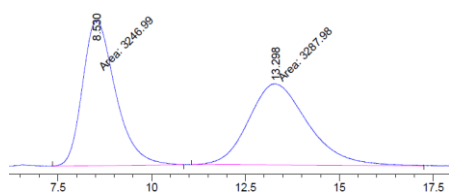

| Peak # | RetTime [min] | Type | Width [min] | Area [mAU*s] | Height [mAU] | Area %  |
|--------|---------------|------|-------------|--------------|--------------|---------|
| 1      | 8.530         | MM   | 1.0144      | 3246.99243   | 53.34689     | 49.6864 |
| 2      | 13.298        | MM   | 1.8393      | 3287.97925   | 29.79452     | 50.3136 |

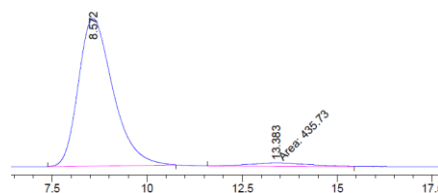

| Peak # | RetTime [min] | Type | Width [min] | Area [mAU*s] | Height [mAU] | Area %  |
|--------|---------------|------|-------------|--------------|--------------|---------|
| 1      | 8.572         | BB   | 0.7449      | 9816.54395   | 155.21477    | 95.7499 |
| 2      | 13.383        | MM   | 1.9767      | 435.72964    | 3.67384      | 4.2501  |

**Tert-butyl (E)-3-(2-(N-benzyl-4-methoxypicolinamido)-3-isopropylphenyl)acrylate 3na**

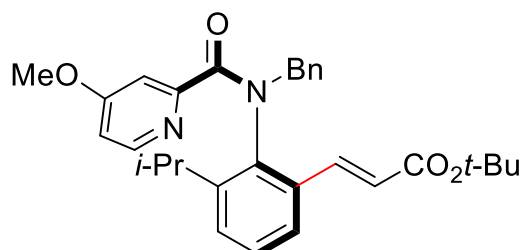

Prepared according to general procedure **A** on a 0.5 mmol scale, column chromatography (*n*-hexane/acetone = 9:1) afforded the title compound as a brown foam (236 mg, 0.48 mmol, 97%), with an enantiomeric ratio of 95/5.

**HRMS** (ESI) calcd for  $C_{30}H_{35}N_2O_4^+$ : 487.2591. Found: 487.2589;

$[\alpha]_D^{20} = -53.8$  ( $c = 1.00$ ,  $CH_2Cl_2$ );

$\nu_{max}$  (thin film/ $cm^{-1}$ ): 1036, 1146, 1258, 1303, 1430, 1448, 1566, 1591, 1638, 1703, 2870, 2967;

**$^1H$  NMR** (400 MHz,  $CDCl_3$ )  $\delta$  7.90 (d,  $J = 5.7$  Hz, 1H), 7.28 (d,  $J = 15.9$  Hz, 1H), 7.24 – 7.15 (m, 9H), 6.55 (dd,  $J = 5.7, 2.6$  Hz, 1H), 5.91 (d,  $J = 15.9$  Hz, 1H), 5.25 (d,  $J = 13.5$  Hz, 1H), 4.68 (d,  $J = 13.5$  Hz, 1H), 3.72 (s, 3H), 3.03 (hept,  $J = 6.8$  Hz, 1H), 1.49 (s, 9H), 0.90 (d,  $J = 6.8$  Hz, 3H), 0.89 (d,  $J = 6.8$  Hz, 3H);

**$^{13}C$  NMR** (100 MHz,  $CDCl_3$ )  $\delta$  168.5 ( $C_q$ ), 165.8 ( $C_q$ ), 165.6 ( $C_q$ ), 155.1 ( $C_q$ ), 148.8 (CH), 147.3 ( $C_q$ ), 140.5 (CH), 139.1 ( $C_q$ ), 135.8 ( $C_q$ ), 133.2 ( $C_q$ ), 130.6 (CH), 128.5 (CH), 128.4 (CH), 128.1 (CH), 127.9 (CH), 124.0 (CH), 121.5 (CH), 111.4 (CH), 109.5 (CH), 80.3 ( $C_q$ ), 55.2 (CH), 54.5 ( $CH_2$ ), 28.3 ( $CH_3$ ), 24.2 ( $CH_3$ ), 23.7 ( $CH_3$ );

**$R_t$**  (AS-3 column, Hex/IPA 90/10, 1.2 mL/min, 273 nm):  $t_r$ (major) = 4.4 min,  $t_r$ (minor) = 11.6 min, 90% *ee*.

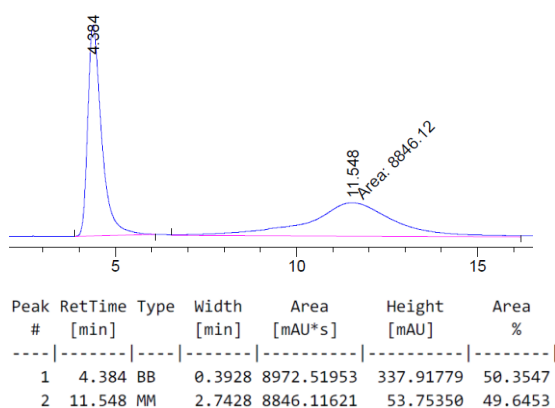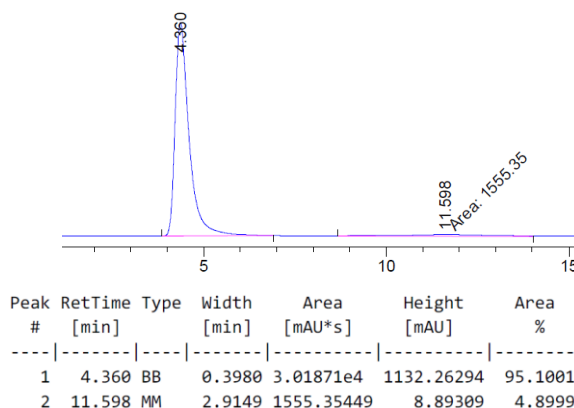

***Tert*-butyl (E)-3-(2-(*N*-benzyl-4-chloropicolinamido)-3-isopropylphenyl)acrylate 3oa**

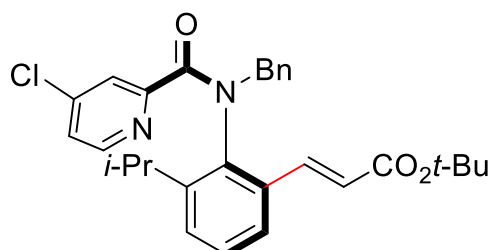

Prepared according to general procedure **A** on a 0.5 mmol scale, column chromatography (*n*-hexane/acetone = 9:1) afforded the title compound as a brown foam (160 mg, 0.33 mmol, 65%), with an enantiomeric ratio of 97/4.

**HRMS** (ESI) calcd for C<sub>29</sub>H<sub>32</sub>N<sub>2</sub>O<sub>3</sub>Cl<sup>+</sup>: 491.2096. Found: 491.2079;

**[α]<sub>D</sub><sup>20</sup>** = -29.4 (*c* = 0.82, CH<sub>2</sub>Cl<sub>2</sub>);

**ν<sub>max</sub>** (thin film/cm<sup>-1</sup>): 1012, 1051, 1078, 1095, 1146, 1232, 1258, 1286, 1320, 1367, 1413, 1446, 1474, 1554, 1573, 1639, 1704, 2870, 1965;

**<sup>1</sup>H NMR** (400 MHz, CDCl<sub>3</sub>) δ 7.97 – 7.93 (m, 1H), 7.74 (dd, *J* = 2.0, 0.6 Hz, 1H), 7.25 – 7.14 (m, 9H), 7.07 – 7.02 (m, 1H), 5.85 (d, *J* = 15.9 Hz, 1H), 5.33 (d, *J* = 13.5 Hz, 1H), 4.60 (d, *J* = 13.5 Hz, 1H), 3.03 (hept, *J* = 6.8 Hz, 1H), 1.50 (s, 9H), 0.95 (d, *J* = 6.8, 3H), 0.94 (d, *J* = 6.8, 3H);

**<sup>13</sup>C NMR** (100 MHz, CDCl<sub>3</sub>) δ 167.4 (C<sub>q</sub>), 165.6 (C<sub>q</sub>), 154.8 (C<sub>q</sub>), 148.3 (CH), 147.1 (C<sub>q</sub>), 144.2 (C<sub>q</sub>), 140.1 (CH), 138.6 (C<sub>q</sub>), 135.5 (C<sub>q</sub>), 133.3 (C<sub>q</sub>), 130.5 (CH), 128.5 (CH), 128.5 (CH), 128.4 (CH), 128.1 (CH), 125.0 (CH), 124.6 (CH), 124.0 (CH), 121.8 (CH), 80.4 (C<sub>q</sub>), 54.6 (CH<sub>2</sub>), 28.3 (CH<sub>3</sub>), 24.2 (CH), 23.7 (CH<sub>3</sub>);

**R<sub>t</sub>** (AS-3 column, Hex/IPA 95/5, 1.0 mL/min, 273 nm): *t<sub>r</sub>*(major) = 5.6 min, *t<sub>r</sub>*(minor) = 8.5 min, 93% *ee*.

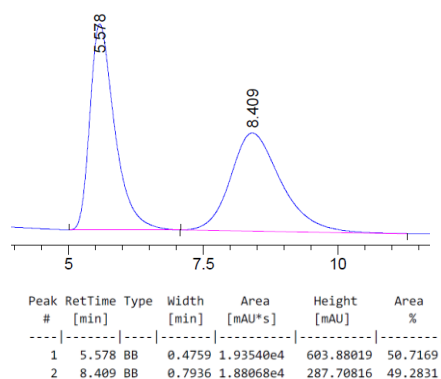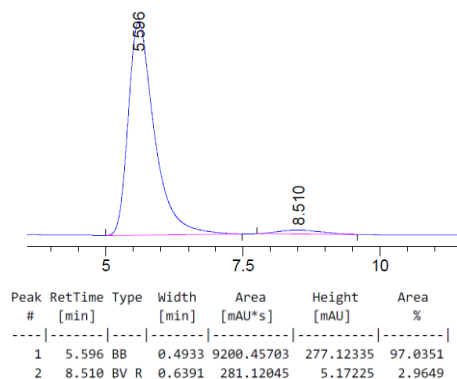

## Renewable energy power setup

For the electrocatalysis powered by sunlight, a commercially available photovoltaic cell (Conrad Electronic SE, TPS-103 6 W, 17.5 V max. voltage, 428 mA max. current, 467 mm x 161 mm x 19 mm) was used.

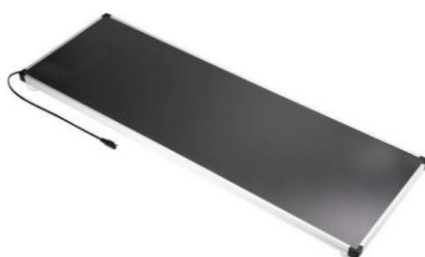

**Figure S1:** Amorphous silicon panel used for the reaction.

The output current was controlled with a customized and normalized constant current regulator and double checked with an ammeter.

The electrocatalysis was carried out in an undivided cell, with a GF anode (10 mm x 15 mm x 6 mm) and a platinum cathode (10 mm x 15 mm x 0.25 mm). A 10 mL cell was charged with the amide **1** (0.5 mmol, 1.0 equiv), Pd(OAc)<sub>2</sub> (11.3 mg, 10 mol%), (*S*)-5-oxoproline (12.9 mg, 20 mol%), 1,4-benzoquinone (5.4 mg, 10 mol%) and NaOAc (82 mg, 1.0 mmol, 2.0 equiv). Then was added 2.5 mL of TFE, 2.5 mL of DME and the olefin **2** (1.5 mmol, 3.0 equiv). The electrocatalysis was performed at 60 °C with a constant current electrolysis for 12-24 h. The current was set at 6.0 mA when there is sufficient sunlight to operate the photovoltaic cell. The resulting mixture was filtered through a celite pad, eluted with EtOAc and concentrated *in vacuo*. The residue was purified by column chromatography to afford the title compound **3**.



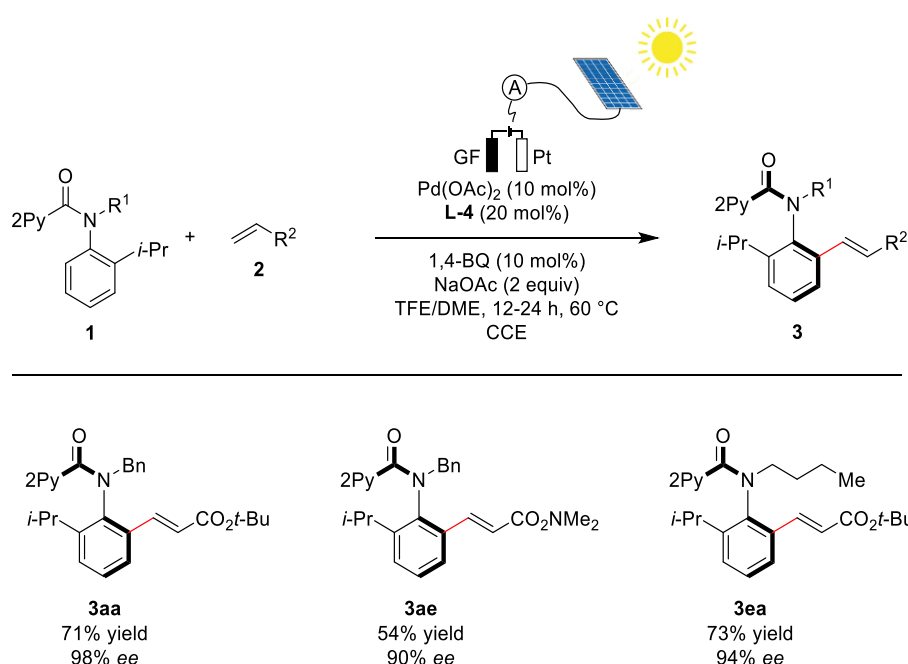

**Scheme S1:** Renewable solar energy for atroposelective C–H olefinations.

## H/D exchange for the asymmetric C–H olefination

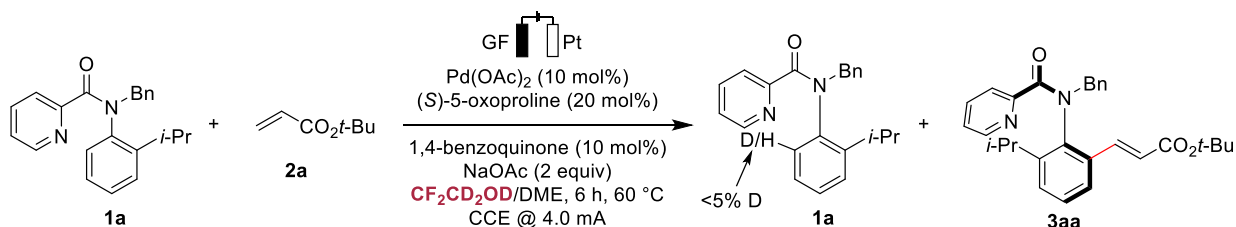

**Scheme S21:** H/D exchange for the atroposelective C–H olefination.

The general procedure A was followed using **1a** (165 mg, 0.50 mmol, 1 equiv), **2a** (0.22 mL, 1.50 mmol, 3 equiv),  $\text{Pd}(\text{OAc})_2$  (11.3 mg, 0.05 mmol, 10 mol%), (S)-5-oxoproline (12.9 mg, 0.10 mmol, 20 mol%), 1,4-benzoquinone (5.4 mg, 0.05 mmol, 10 mol%) and NaOAc (82 mg, 1.00 mmol, 2 equiv) in  $\text{CF}_2\text{CD}_2\text{OD}$  (2.5 mL) and DME (2.5 mL) at 60 °C, with a constant current of 4.0 mA for 6 h. The resulting mixture was filtered through a celite pad, eluted with EtOAc and concentrated *in vacuo*. The residue was purified by column chromatography to afford the title compound **3aa** (75 mg, 0.17 mmol, 33%) and **1a** (110 mg, 0.34 mmol, 67% reisolated) without obvious H/D exchange.

## Determination of the KIE by comparison of the initial reaction rates

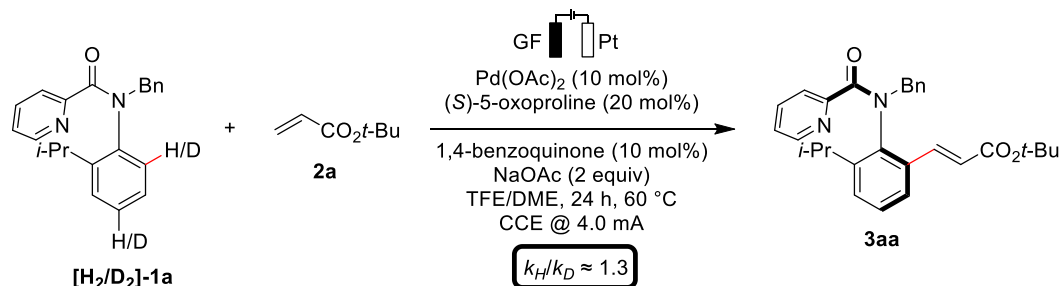

**Scheme S3:** KIE study for the atroposelective C–H olefination.

Two parallel reactions of **1a** and [D]<sub>2</sub>-**1a** with **2a** were performed following the general procedure **A** to determine the KIE by comparison of the initial reaction rates through <sup>1</sup>H-NMR analysis with 1,3,5-trimethoxybenzene as the internal standard. Aliquots were periodically taken, the NMR yield was determined by <sup>1</sup>H-NMR and plotted. A linear fit resulted in a KIE value of  $k_H/k_D \approx 1.3$  (Table S1).

**Table S1:** Conversion-time table

| t (min)                                        | 15 | 30  | 45  | 60  | 90   | 120  | 180  |
|------------------------------------------------|----|-----|-----|-----|------|------|------|
| NMR yield of <b>3aa</b> (%)                    | 0  | 3.7 | 6.2 | 7.4 | 10.4 | 15.6 | 20.1 |
| NMR yield of [D] <sub>2</sub> - <b>3aa</b> (%) | 0  | 2   | 3.4 | 6.2 | 8    | 10.6 | 14   |

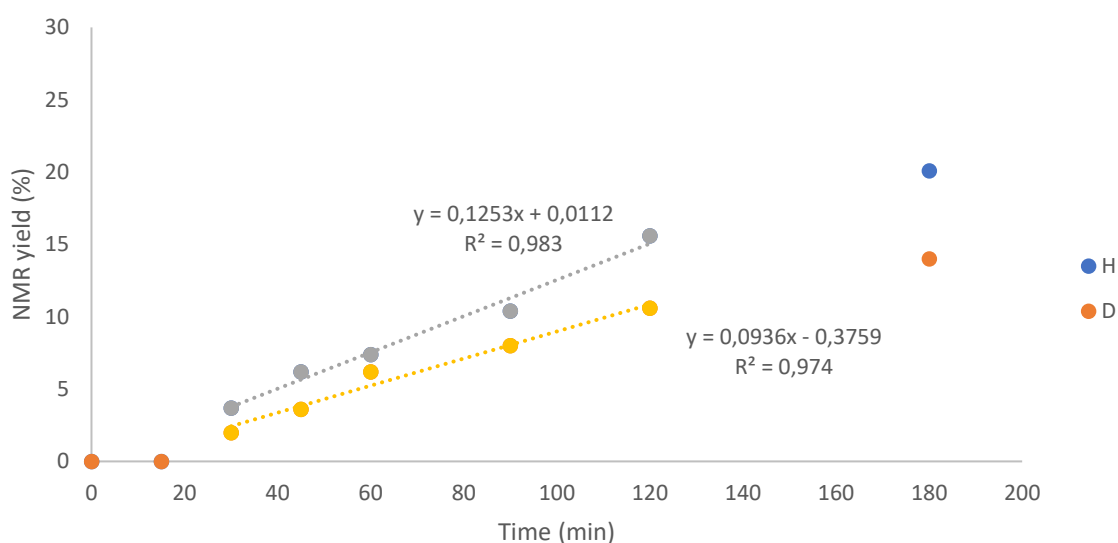

## Kinetic studies for the dependence in current

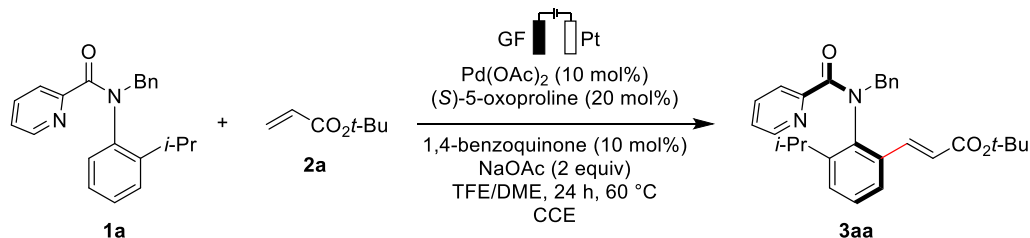

**Scheme S4:** Dependence in current for the atroposelective C–H olefination.

Six parallel electrolyses were carried out at different current (0.0, 1.0, 2.0, 3.0, 4.0, 6.0 mA) following the general procedure **A**. Aliquots were periodically taken and the NMR yield was determined by  $^1\text{H}$ -NMR with 1,3,5-trimethoxybenzene as the internal standard. The determined NMR yields of **3aa** were plotted in Figure S2. Results showed a dependence of the NMR yield on the current from 0.0 to 4.0 mA, suggesting a turnover-limiting electron transfer step. The reaction could occur without current but with a low conversion. This low conversion could be explained by the presence of oxygen in the air, which could act as an oxidant.

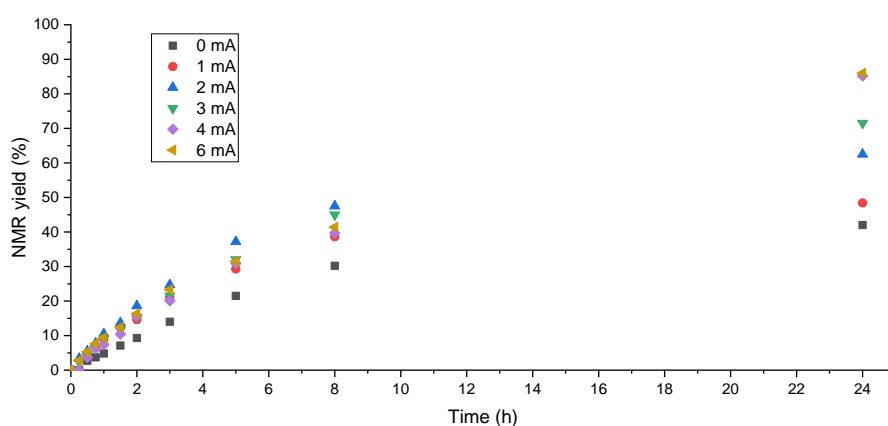

**Figure S2:** Reaction profiles with different current.

## *In operando* React-IR

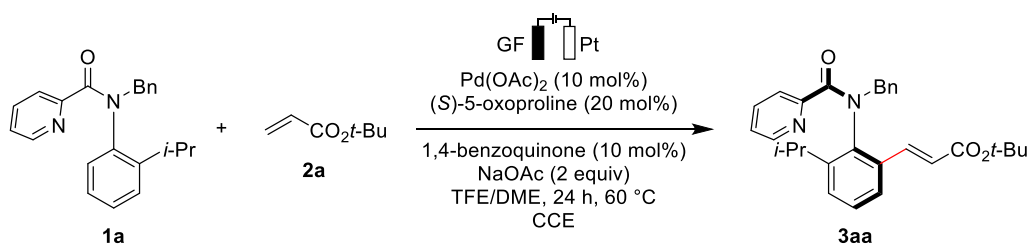

**Scheme S5:** *In operando* React-IR.

The electrocatalysis was carried out in a three-neck flask, with a GF anode (10 mm x 15 mm x 6 mm) and a platinum cathode (10 mm x 15 mm x 0.25 mm) and fitted with a diamond probe connected to a Mettler Toledo ReactIR. The cell was charged with the amide **1** (0.5 mmol, 1.0 equiv), Pd(OAc)<sub>2</sub> (11.3 mg, 10 mol%), (*S*)-5-oxoproline (12.9 mg, 20 mol%), 1,4-benzoquinone (5.4 mg, 10 mol%) and NaOAc (82 mg, 2.0 equiv). Then was added 5 mL of TFE, 5 mL of DME and the olefin **2** (3.0 equiv). The electrocatalysis was performed at 60 °C with a constant current of 4.0 mA maintained for 24 h. Every minutes for 8 hours and then every 2 min for 16 hours, an IR spectrum was recorded. Peaks at 1023 cm<sup>-1</sup> and 1225 cm<sup>-1</sup> were identified to belong respectively to the product and the starting material.

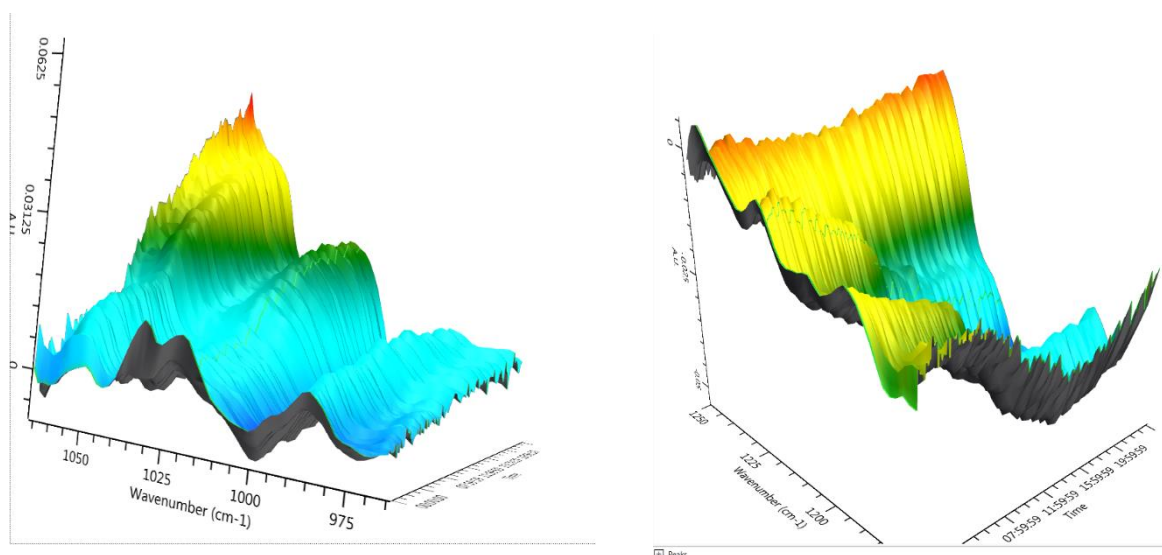

**Figure S3:** 3D-surface plot of the observed vibrations at 1023 cm<sup>-1</sup> on the left and 1225 cm<sup>-1</sup> on the right.

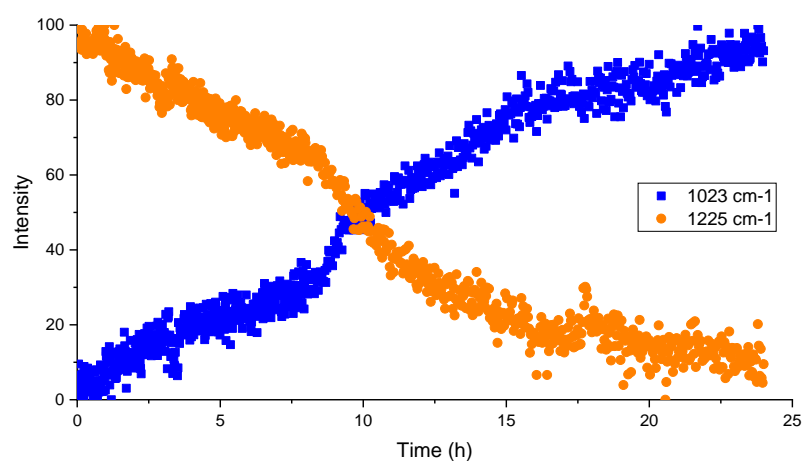

**Figure S4:** Plot of the observed vibrations over time.

## Cyclic voltammetry

CV measurements were conducted with a Metrohm Autolab PGSTAT204 potentiostat and Nova 2.1 software. A glassy carbon working electrode (disk, diameter: 3mm), a coiled platinum wire counter electrode and a silver-silver chloride electrode (Ag/AgCl) were employed. The voltammograms were recorded at room temperature in TFE/DME (1/1) at a substrate concentration of 5.0 mM and with 0.1 M *n*-Bu<sub>4</sub>NPF<sub>6</sub> as supporting electrolyte. The scan rate is 100 mV/s. Deviations from the general experimental conditions are indicated in the respective figures and descriptions.

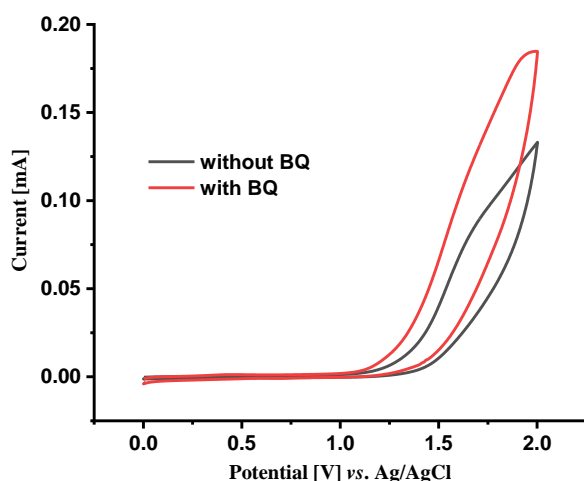

**Figure S5:** Cyclic voltammetry of the mixture of **1a**, **2a**, Pd(OAc)<sub>2</sub>, (S)-5-oxoproline and NaOAc, with or without 1,4-BQ.

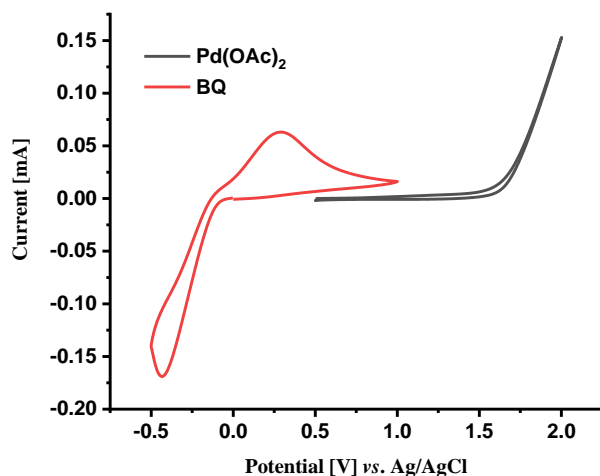

**Figure S6:** Cyclic voltammetry of Pd(OAc)<sub>2</sub> and 1,4-BQ separately.

## HRMS ESI analysis

General procedure A was followed. Aliquots were periodically taken, diluted in TFE and spectra were measured.

Different palladium complexes could be identified. However, none have the chiral ligand as a ligand. Given the enantiomeric excesses obtained, we assume that the non-identification of complexes carrying the chiral ligand is due to the fact that they are uncharged and therefore more difficult to detect.

We also envisaged that the enantioenriched product could serve as the chiral ligand for the next catalytic cycle. However, the test reaction replacing the (*S*)-5-oxoproline by the product **3aa** gave only low enantioselectivity.

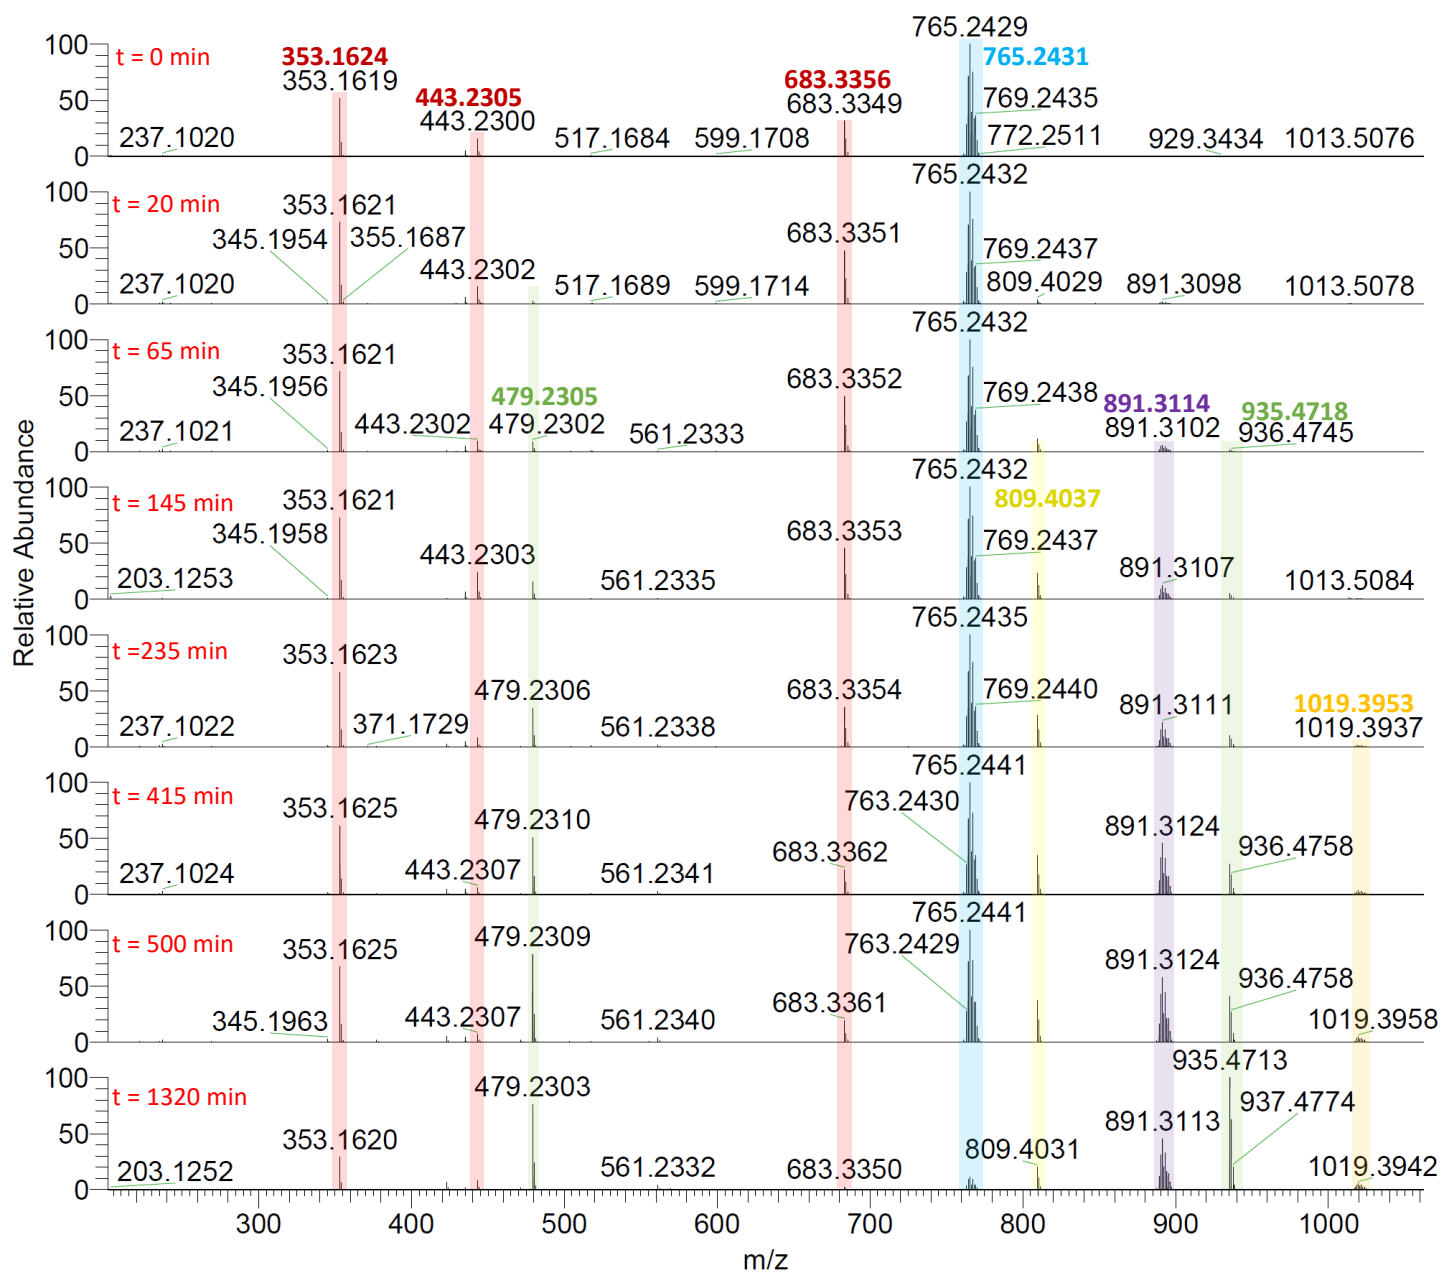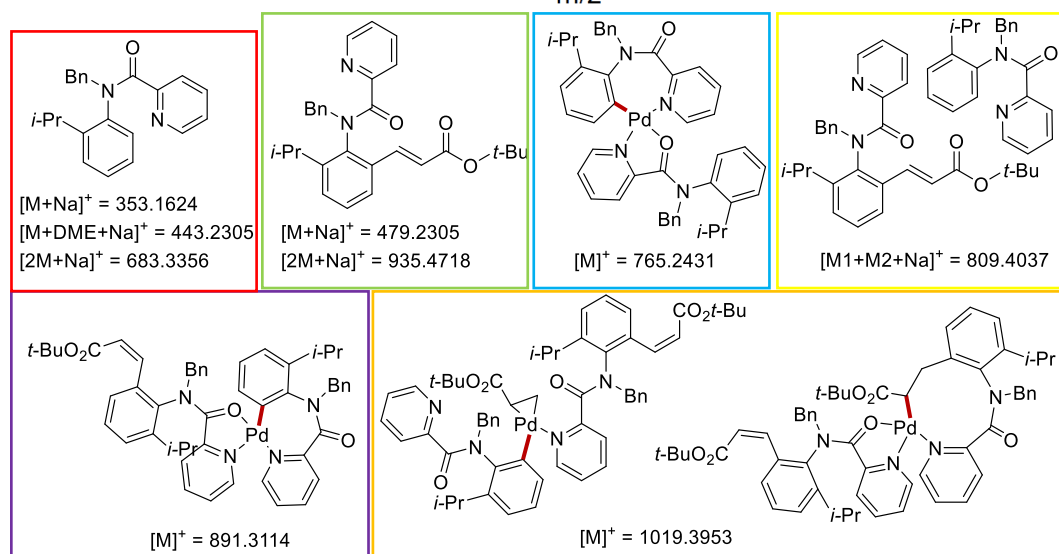

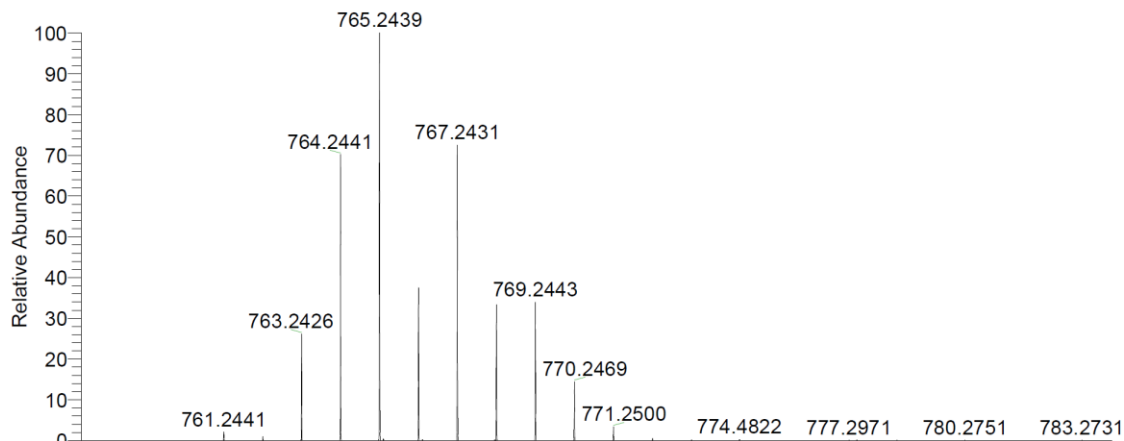

NL:  
1.10E9  
jf304\_t8\_pos#4 RT: 0.03 AV:  
1 T: FTMS + p ESI Full ms  
[150.0000-2000.0000]

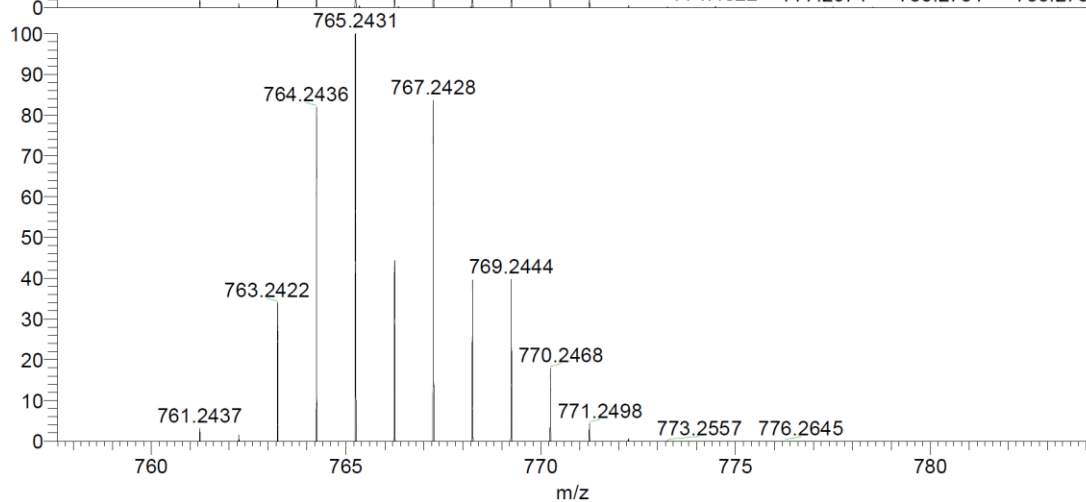

NL:  
4.68E3  
C<sub>44</sub>H<sub>43</sub>N<sub>4</sub>O<sub>2</sub>Pd:  
C<sub>44</sub>H<sub>43</sub>N<sub>4</sub>O<sub>2</sub>Pd<sub>1</sub>  
p (gss, s /p:40) Chrg 1  
R: 90000 Res .Pwr . @FWHM

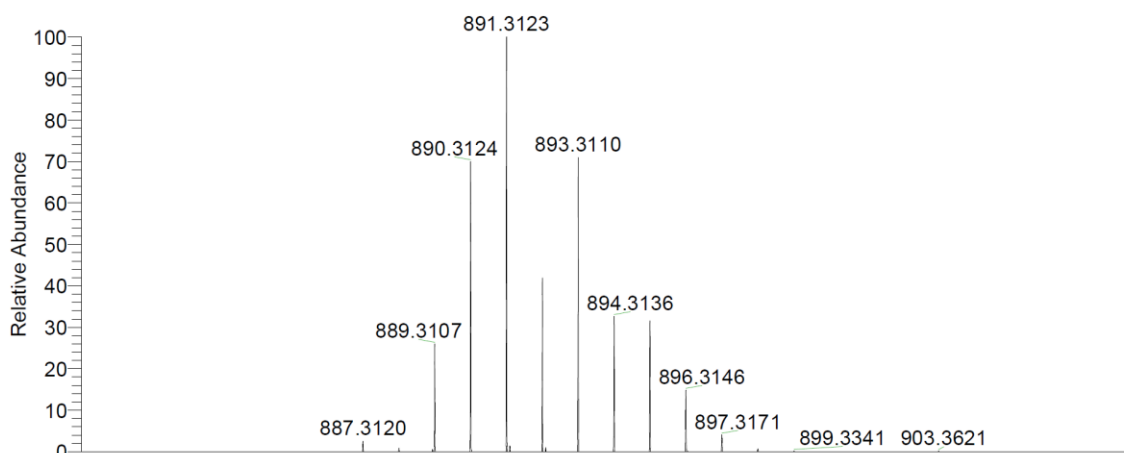

NL:  
6.60E8  
jf304\_t8\_pos#4 RT: 0.03 AV:  
1 T: FTMS + p ESI Full ms  
[150.0000-2000.0000]

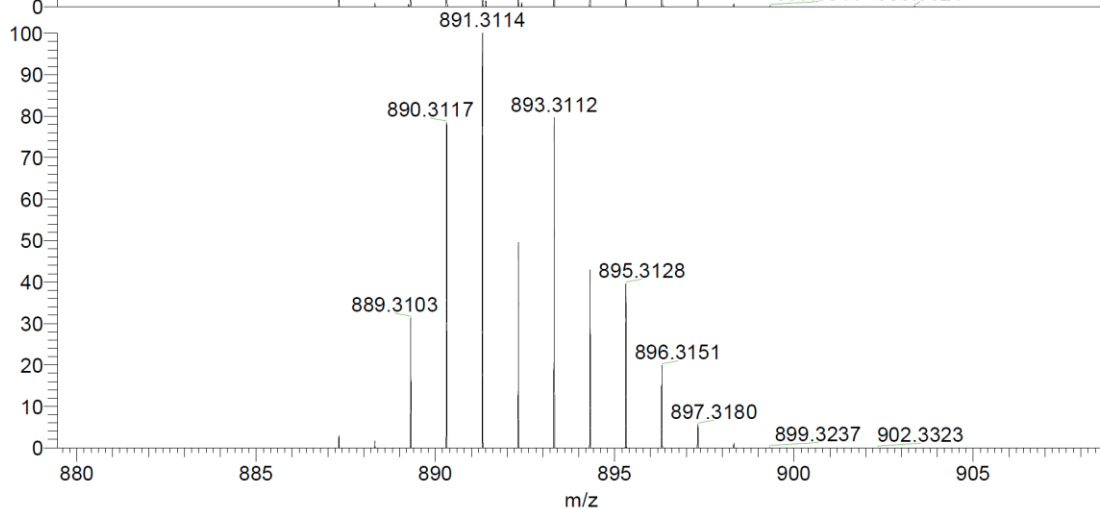

NL:  
4.68E3  
C<sub>51</sub>H<sub>53</sub>N<sub>4</sub>O<sub>4</sub>Pd:  
C<sub>51</sub>H<sub>53</sub>N<sub>4</sub>O<sub>4</sub>Pd<sub>1</sub>  
p (gss, s /p:40) Chrg 1  
R: 90000 Res .Pwr . @FWHM



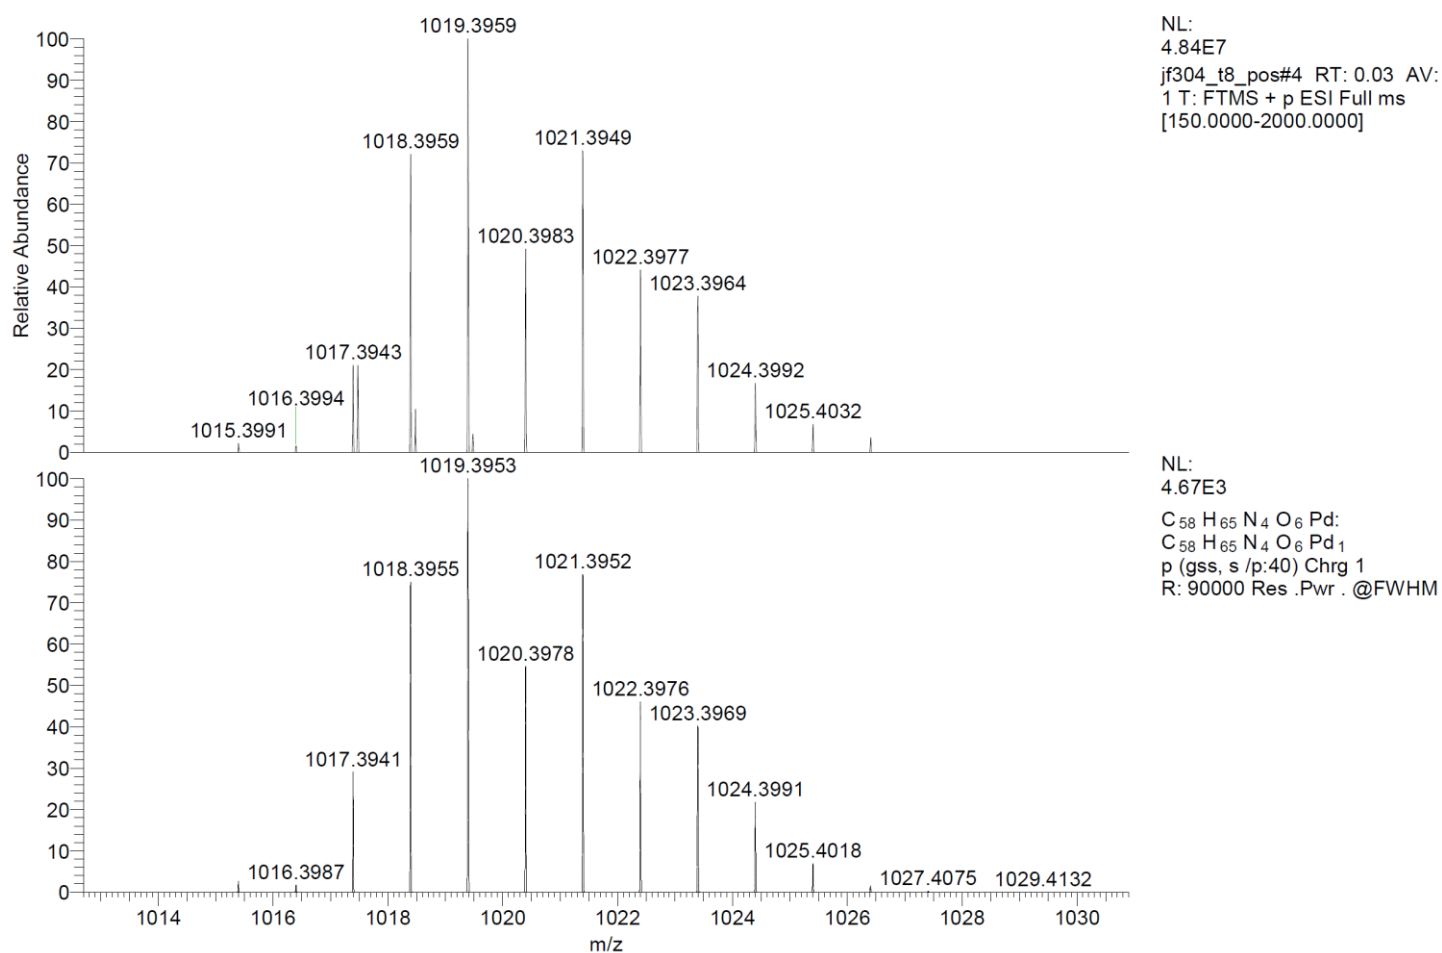

## References

[1] Q-J. Yao, P-P. Xie, Y-J. Wu, Y-L. Feng, M-Y. Teng, X. Hong, B-F. Shi, *J. Am. Chem. Soc* 2020, **142**, 18266-18276

## NMR spectra

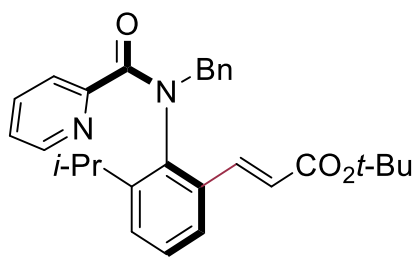

**3aa**

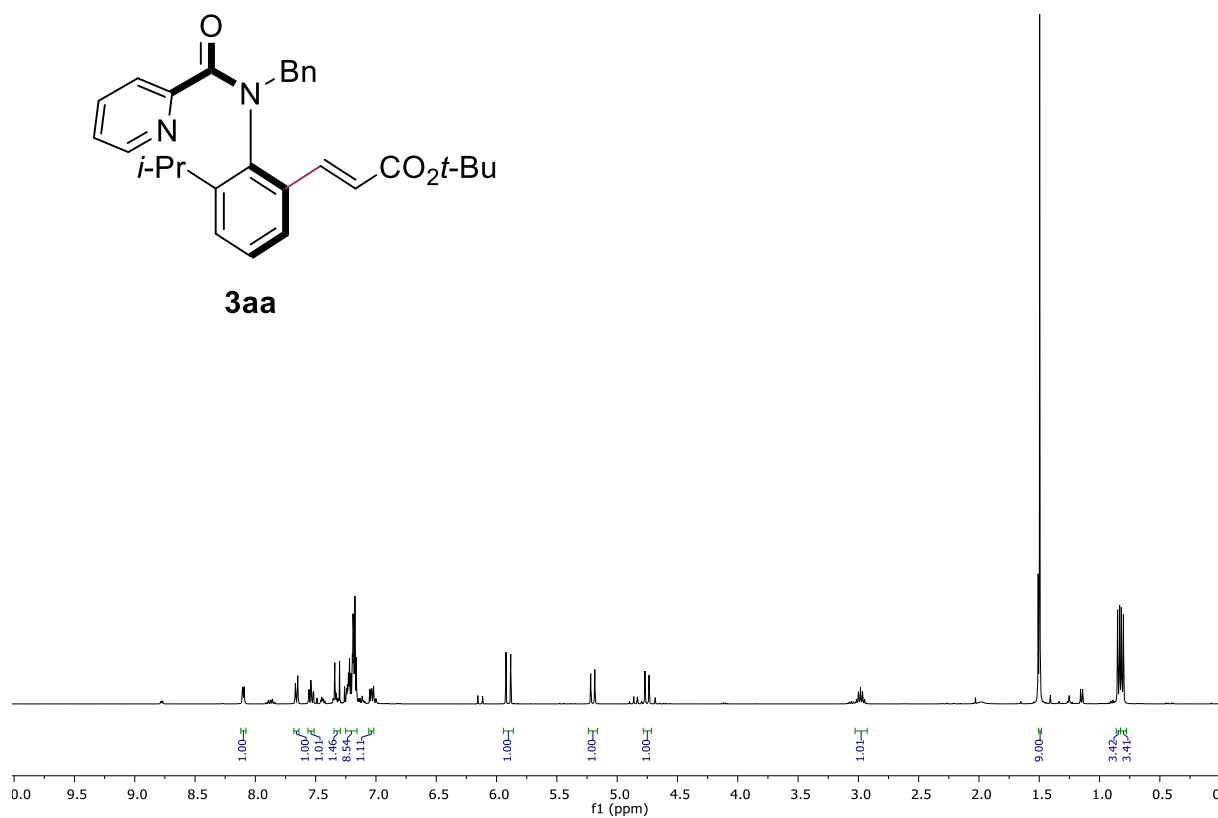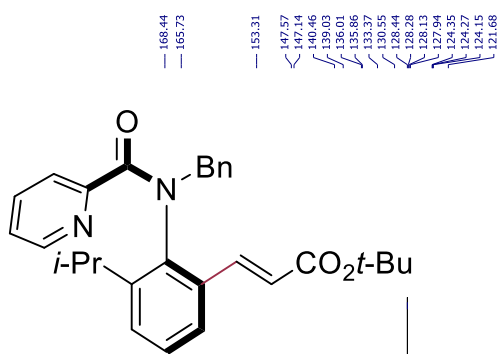

**3aa**

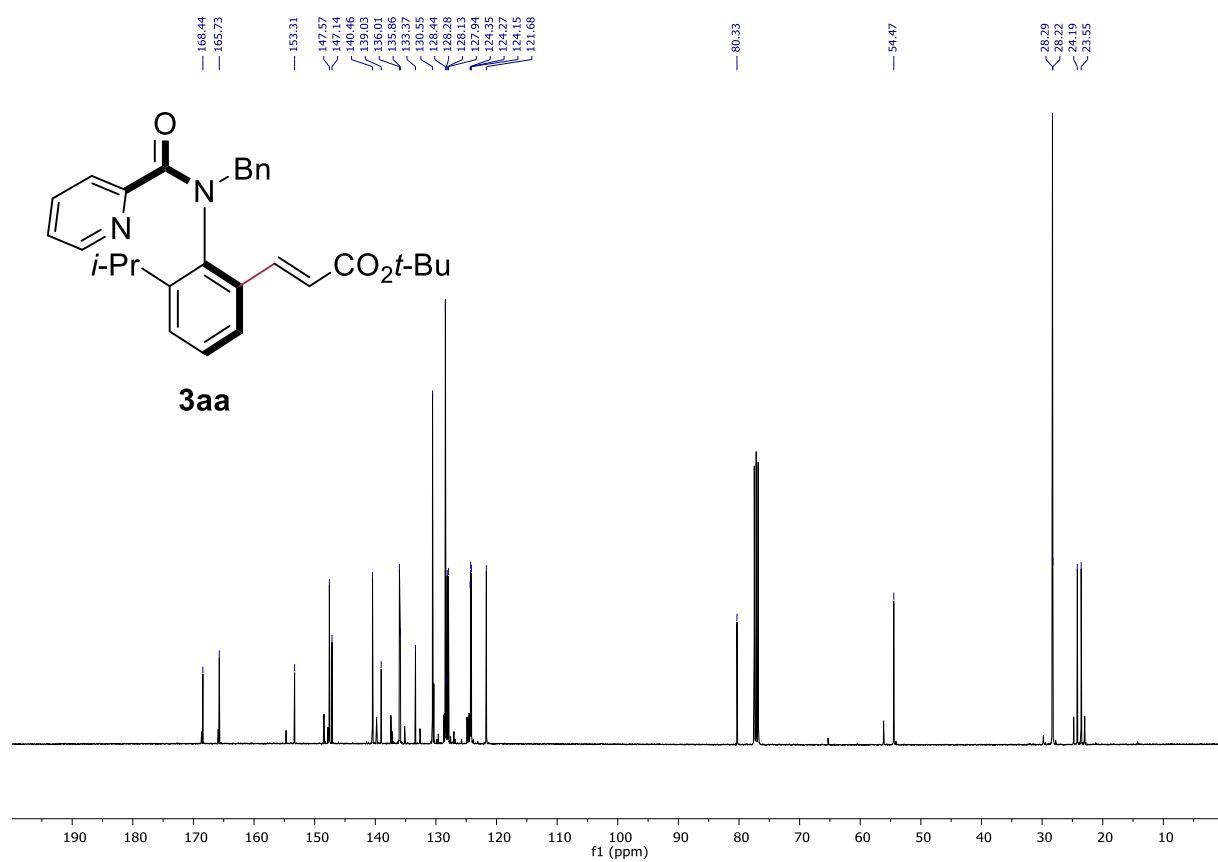

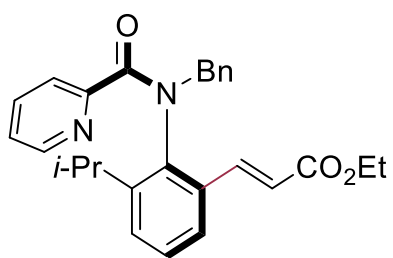

**3ab**

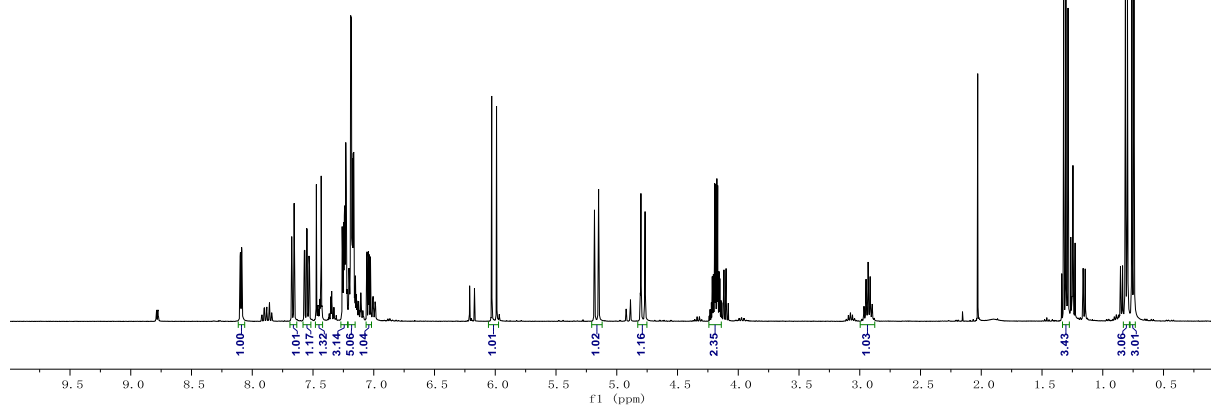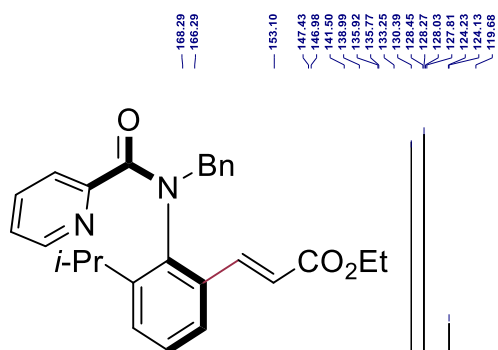

**3ab**

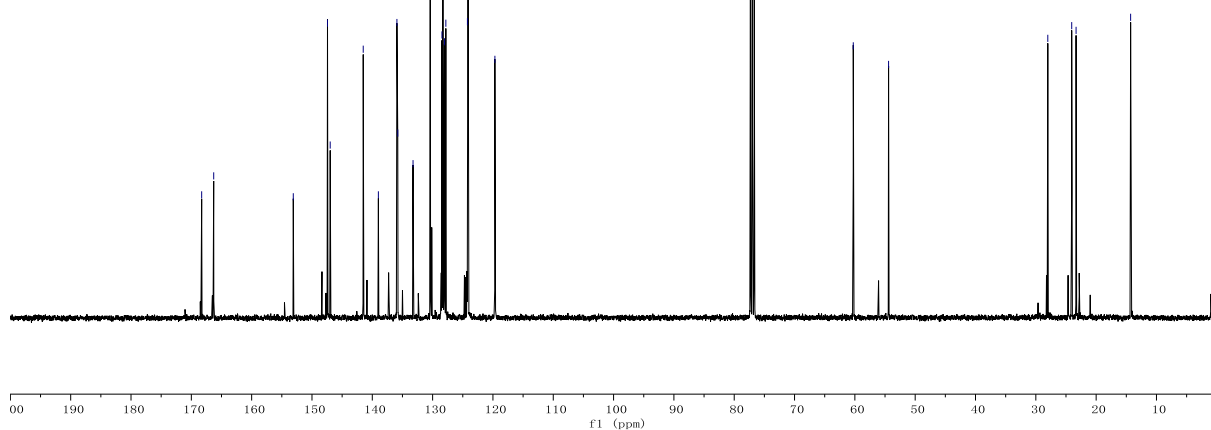

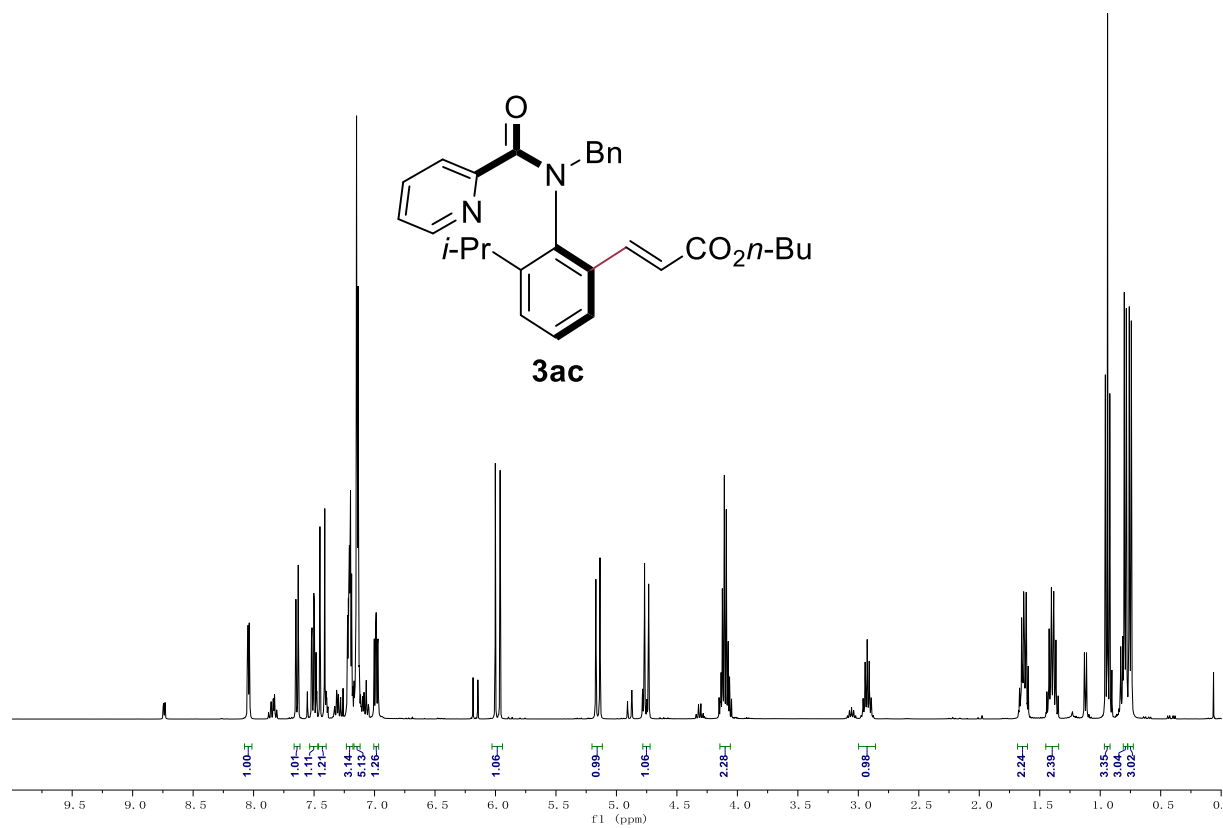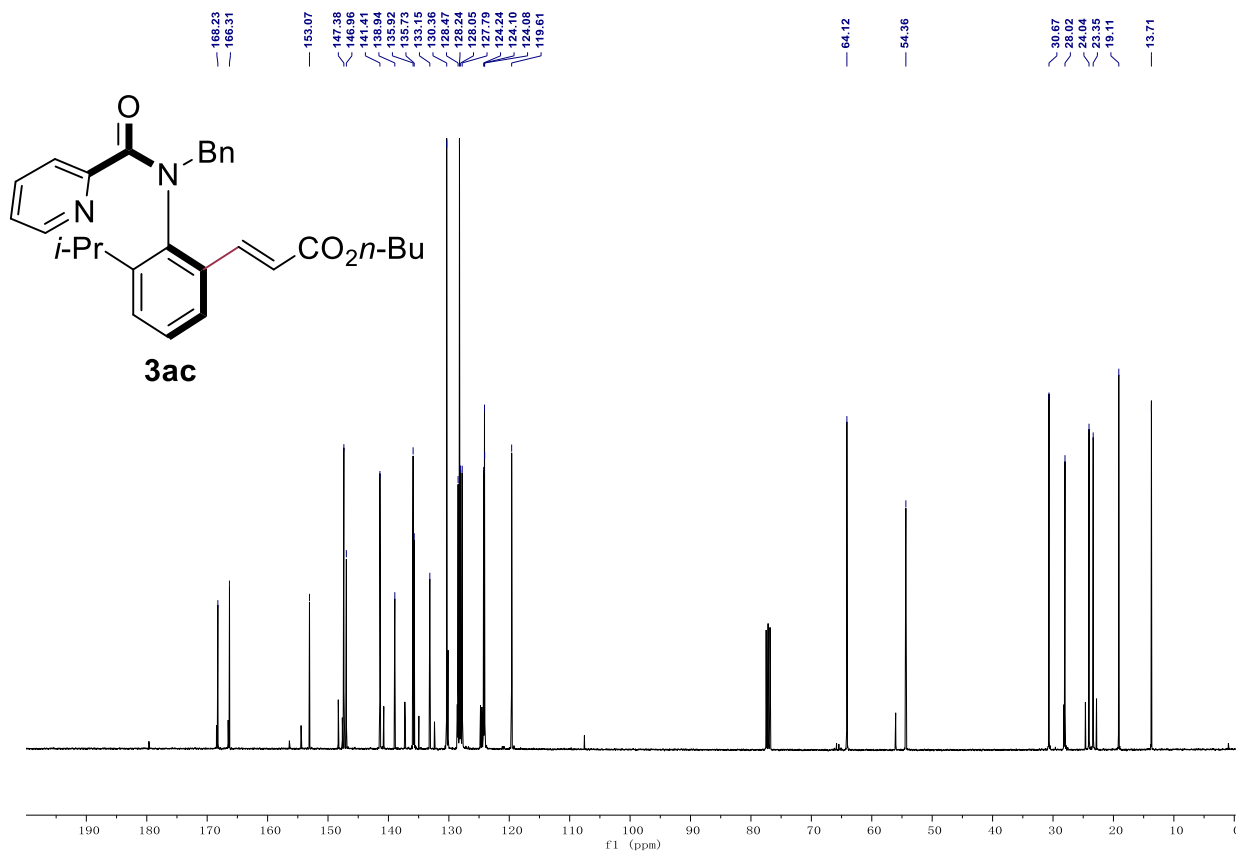

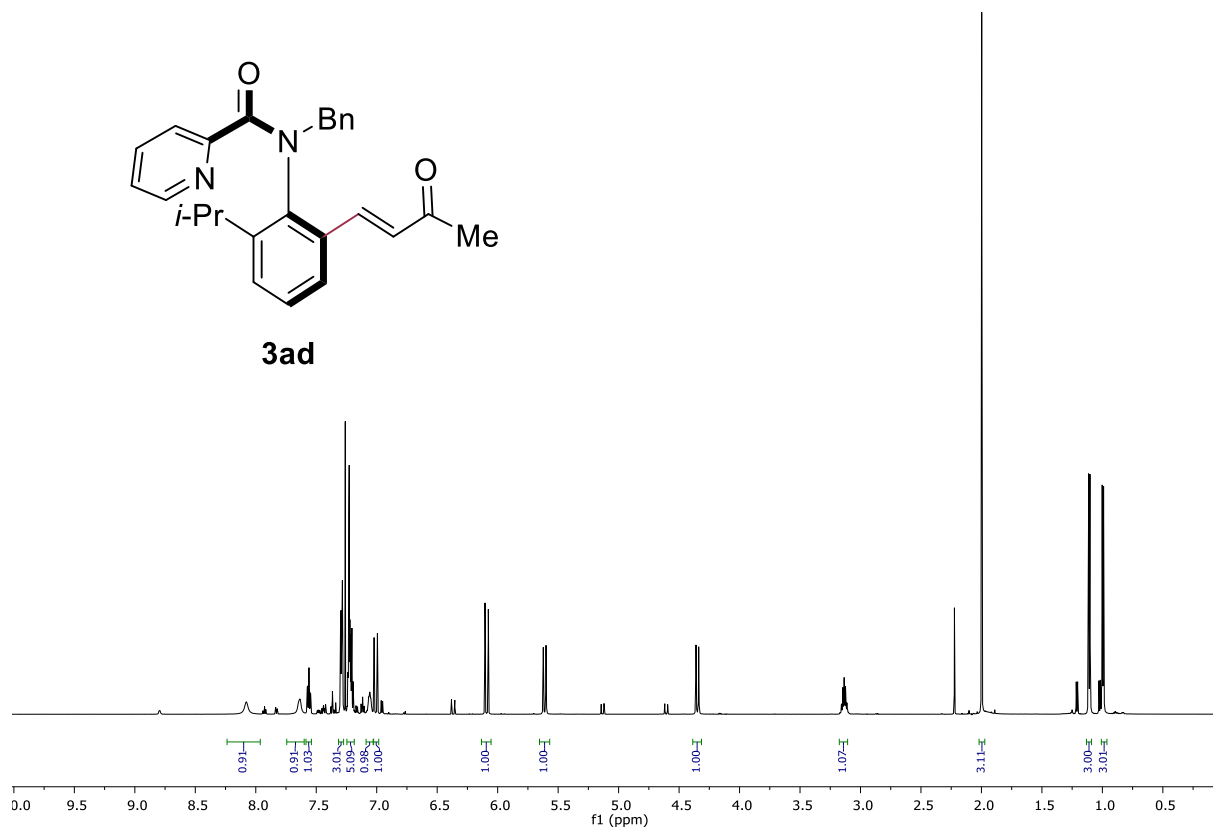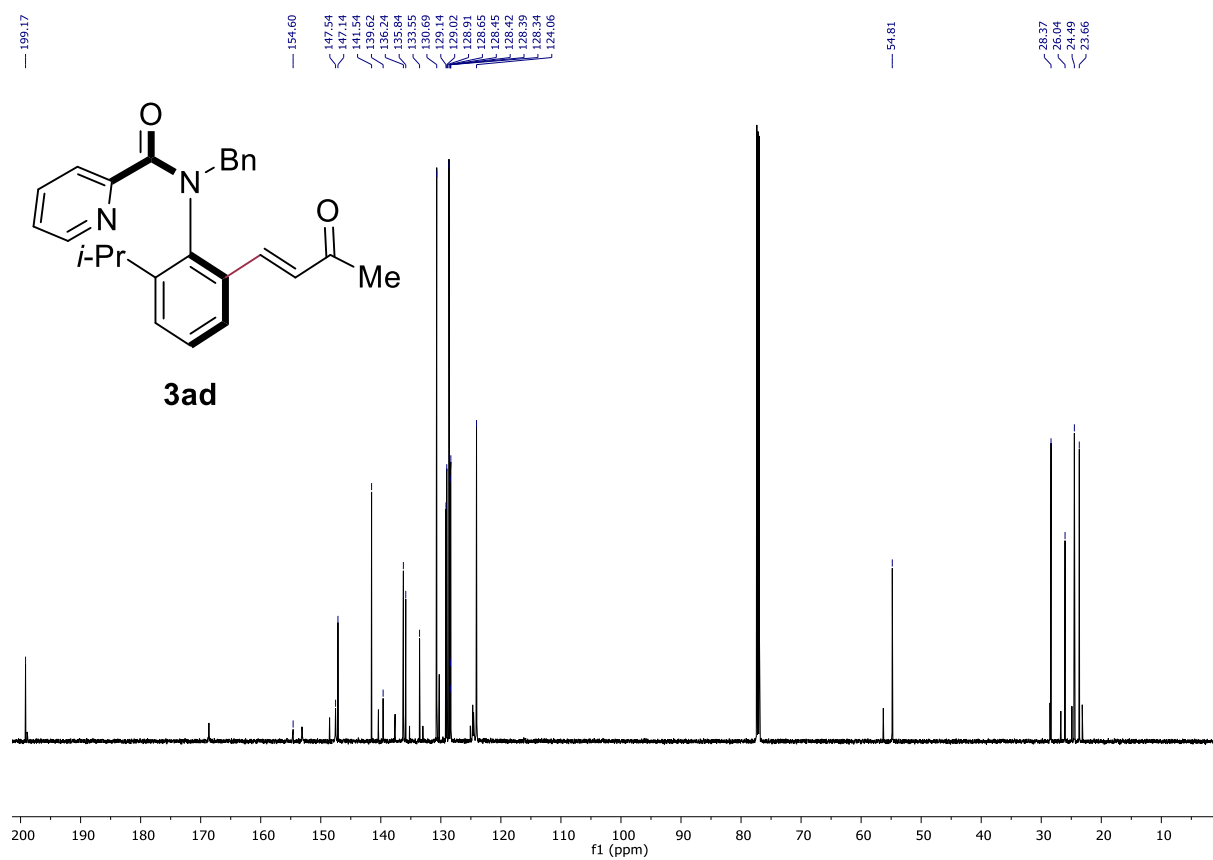

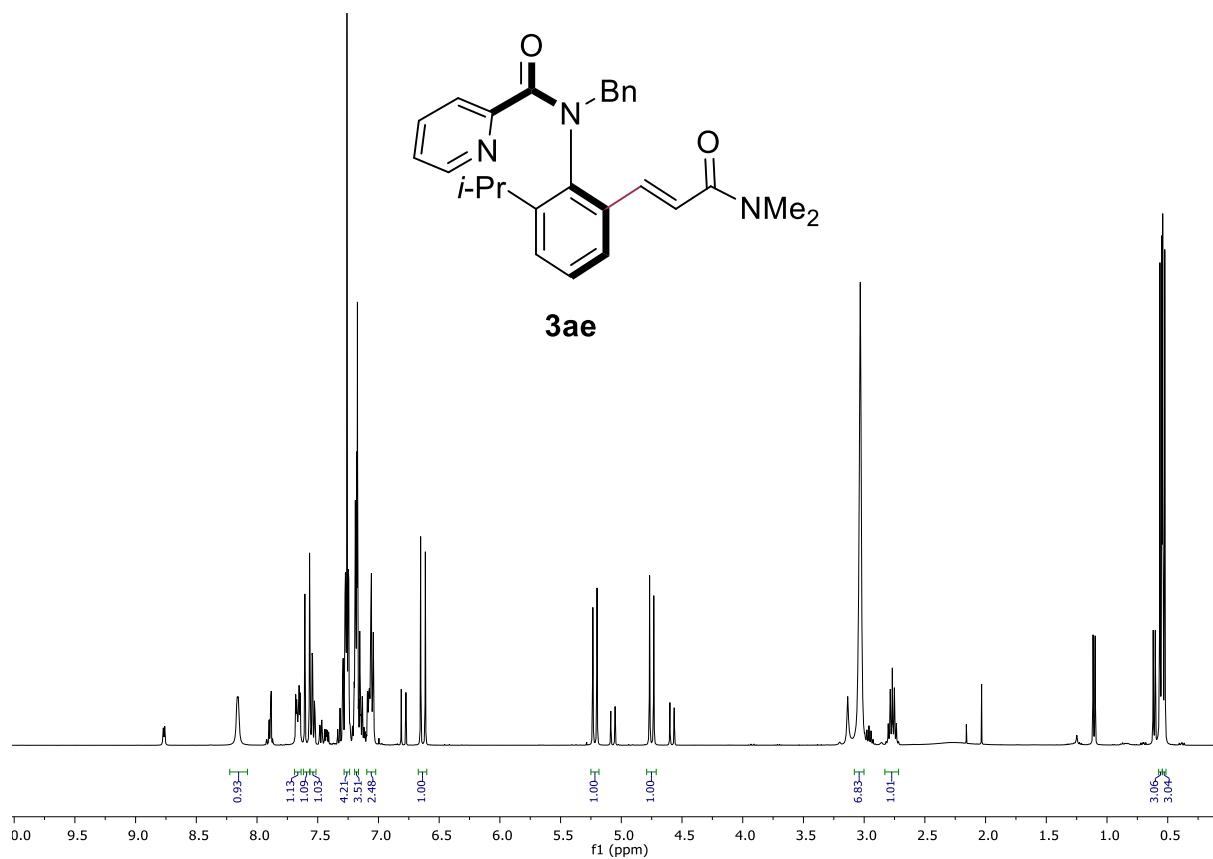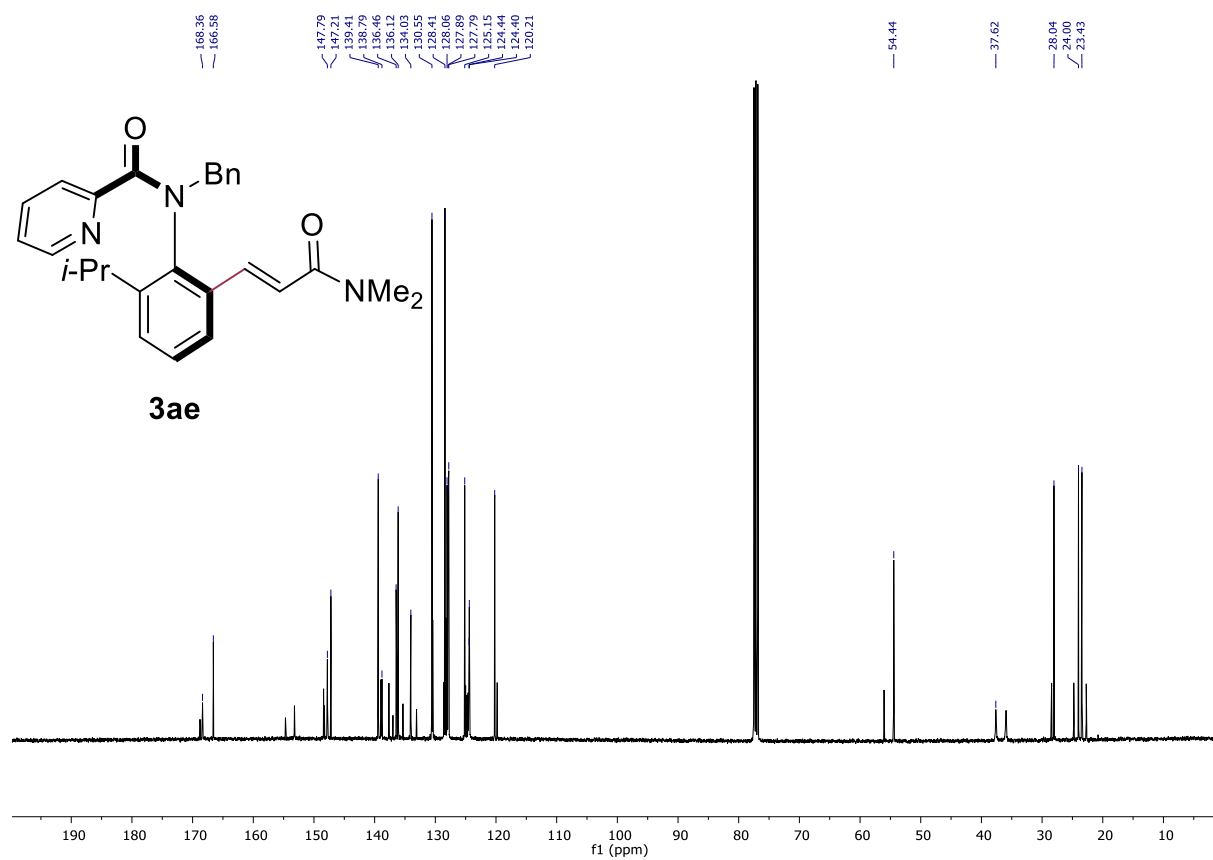

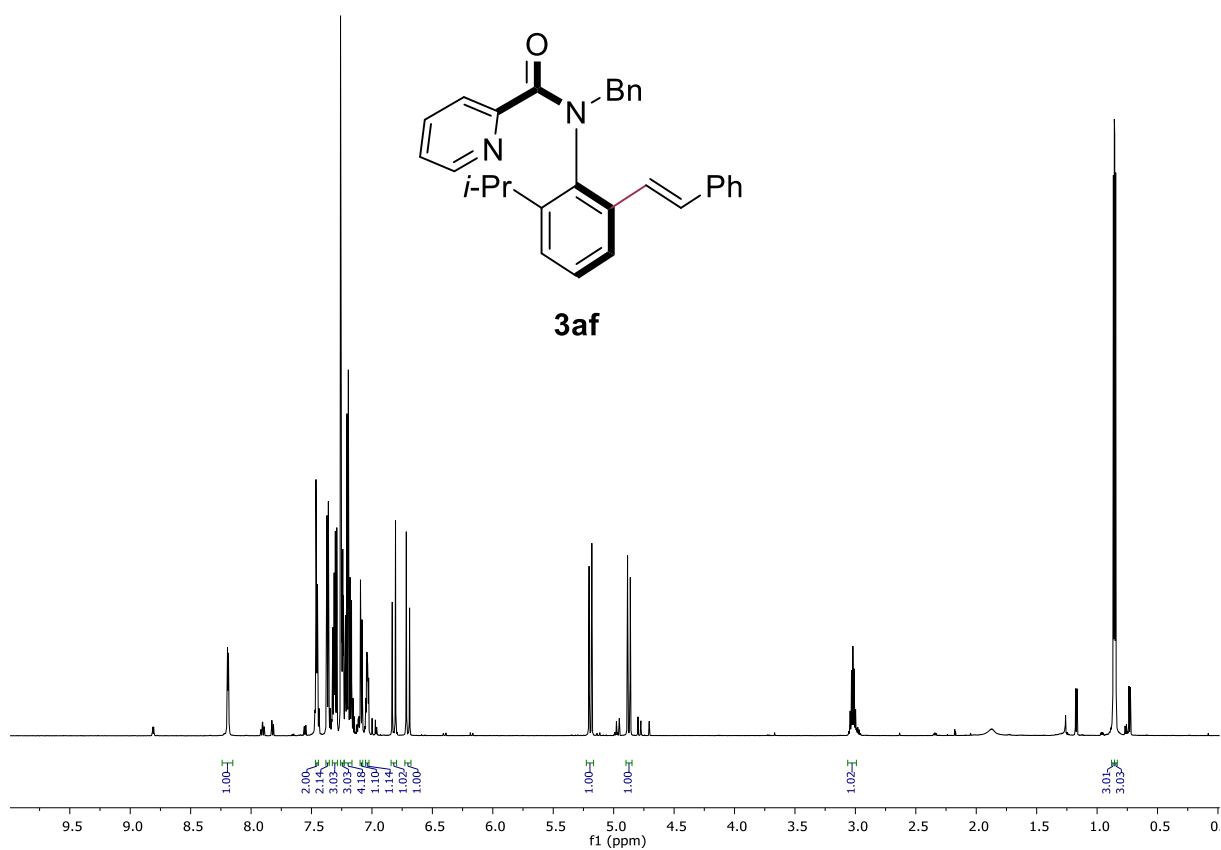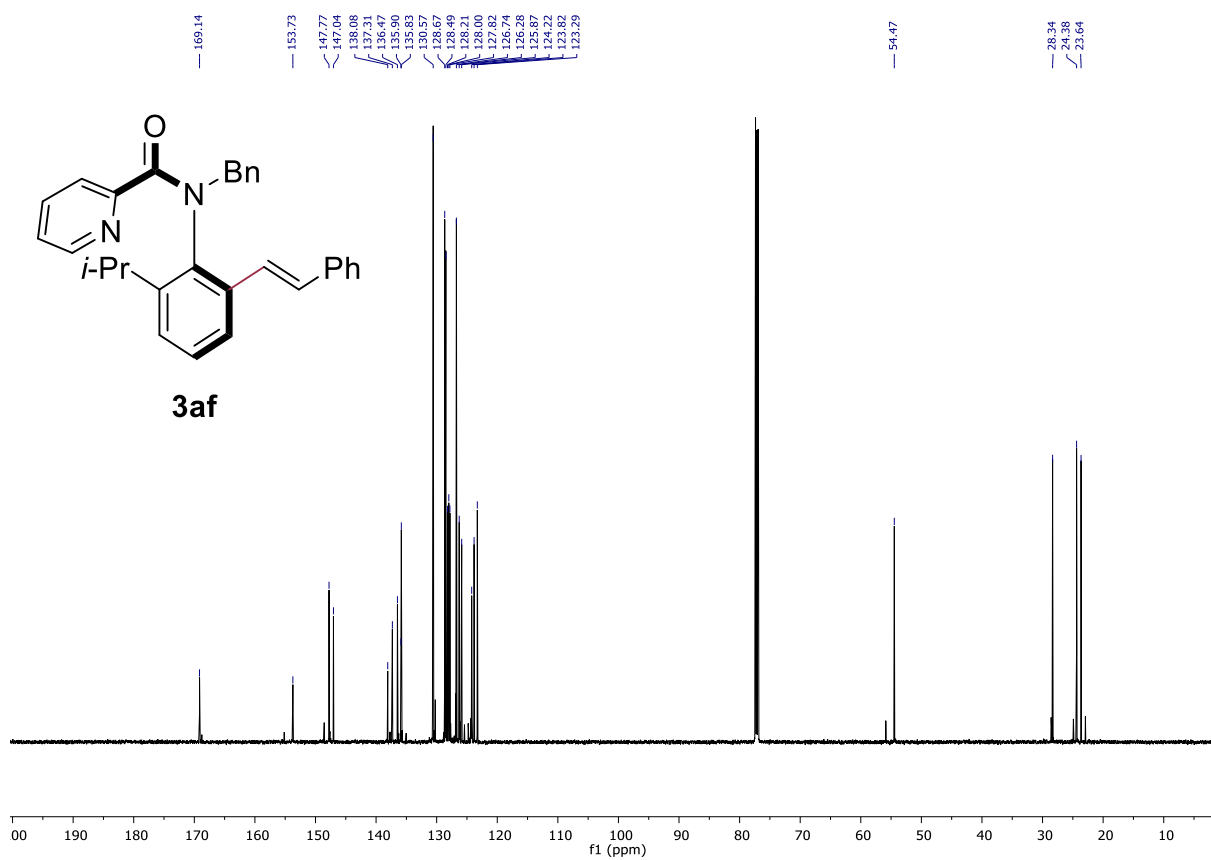

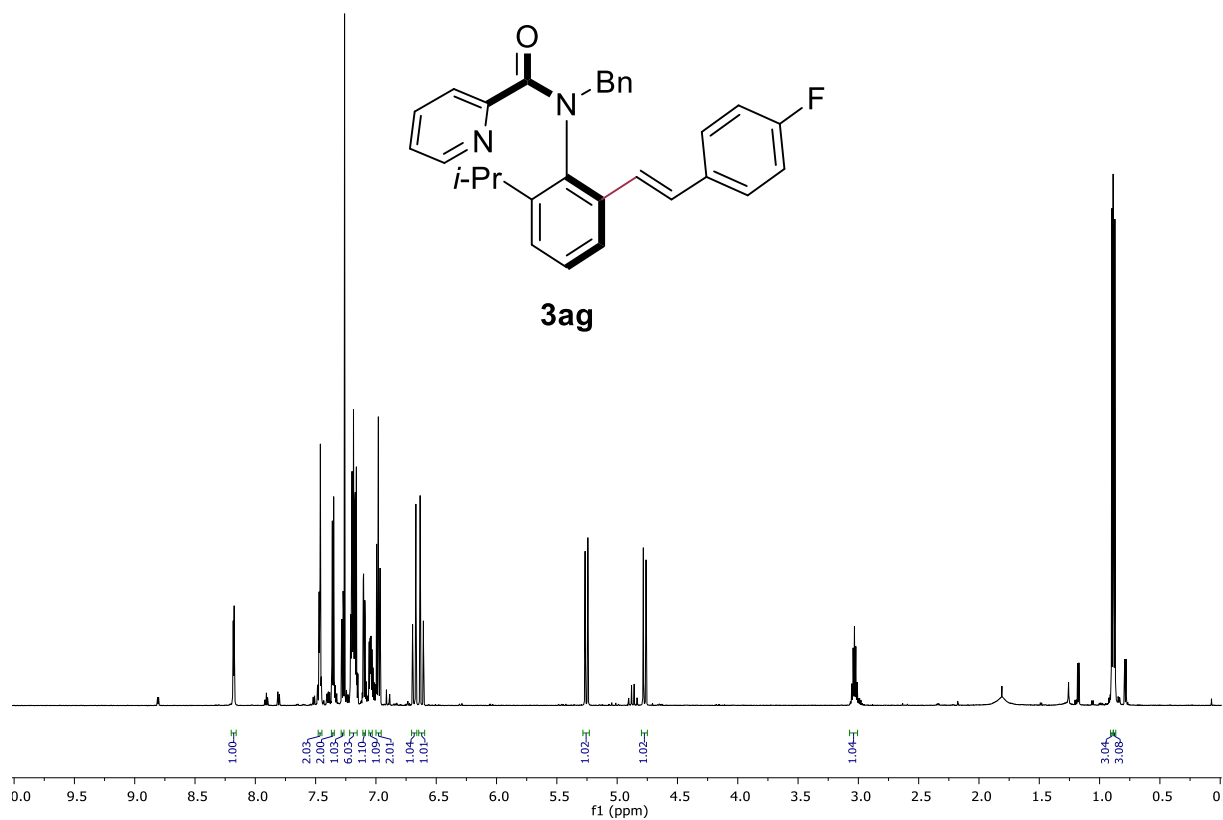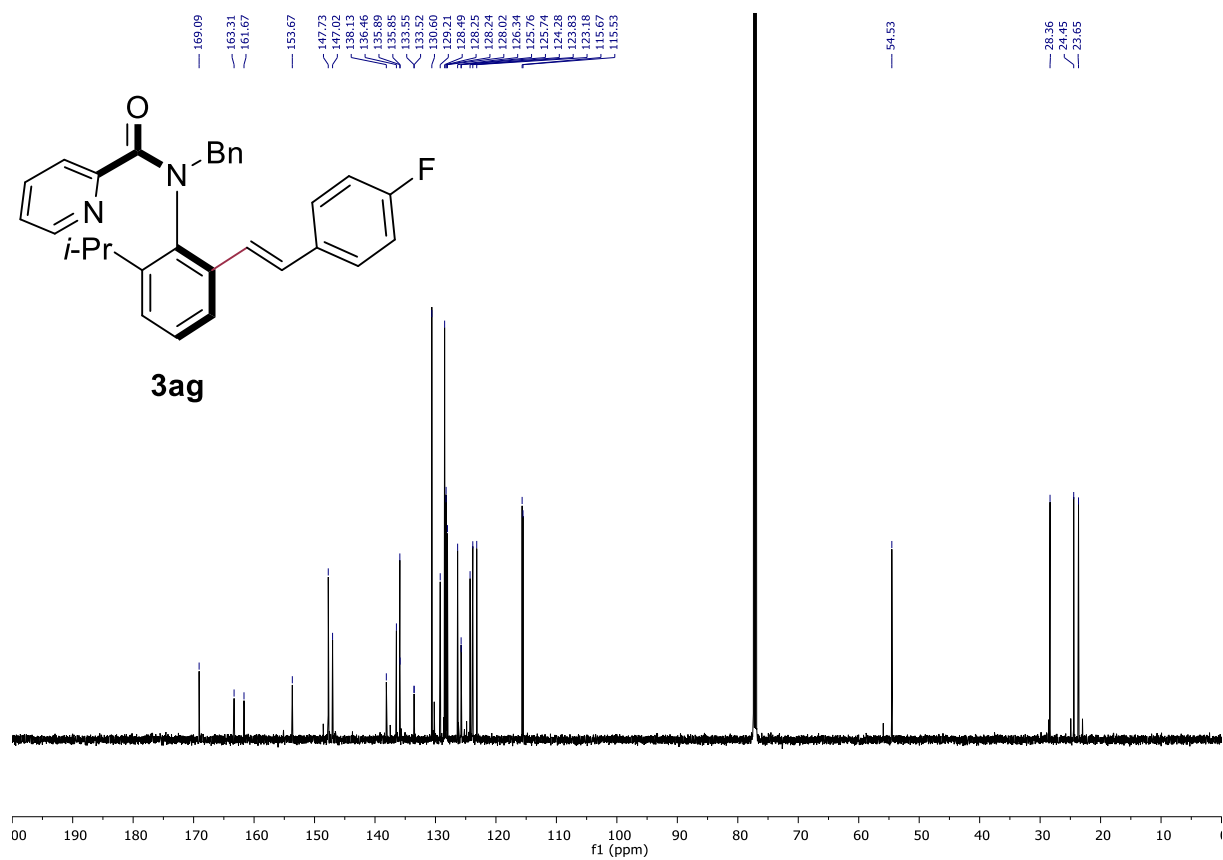



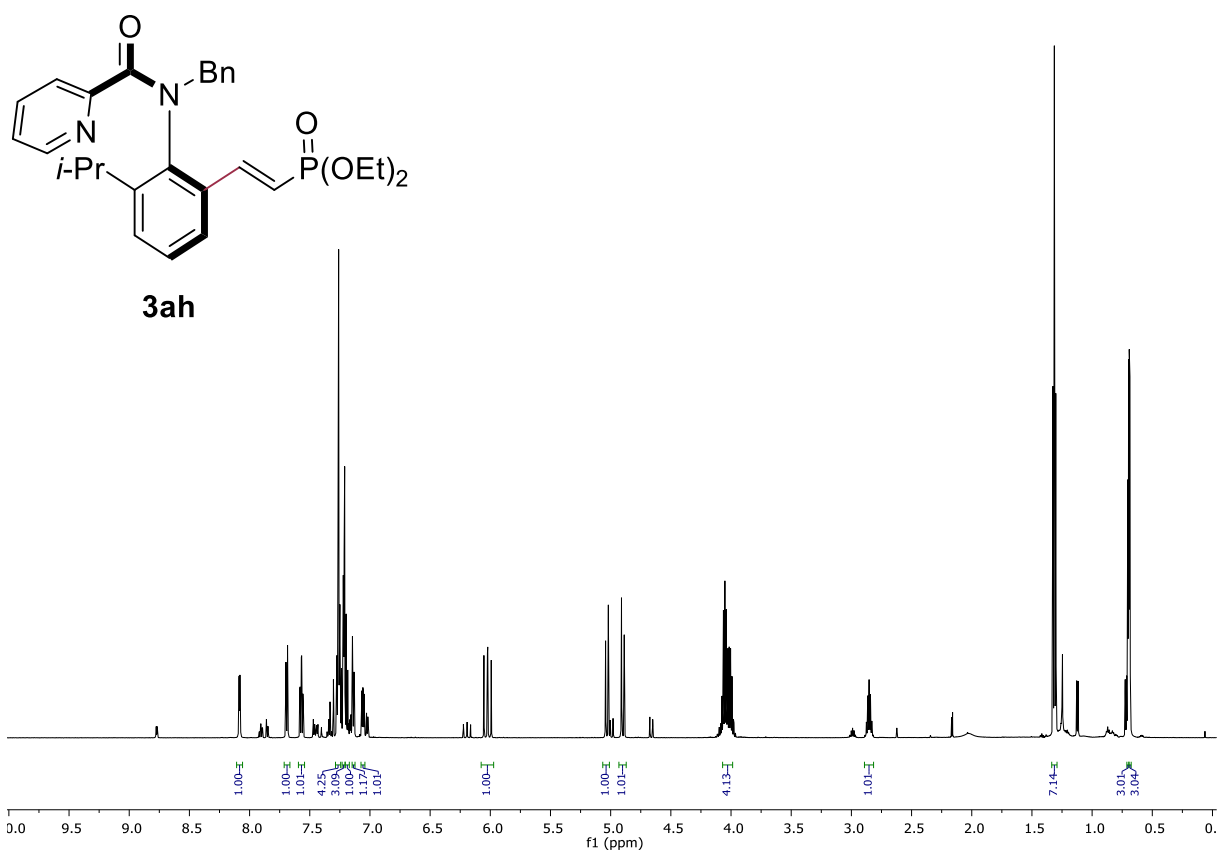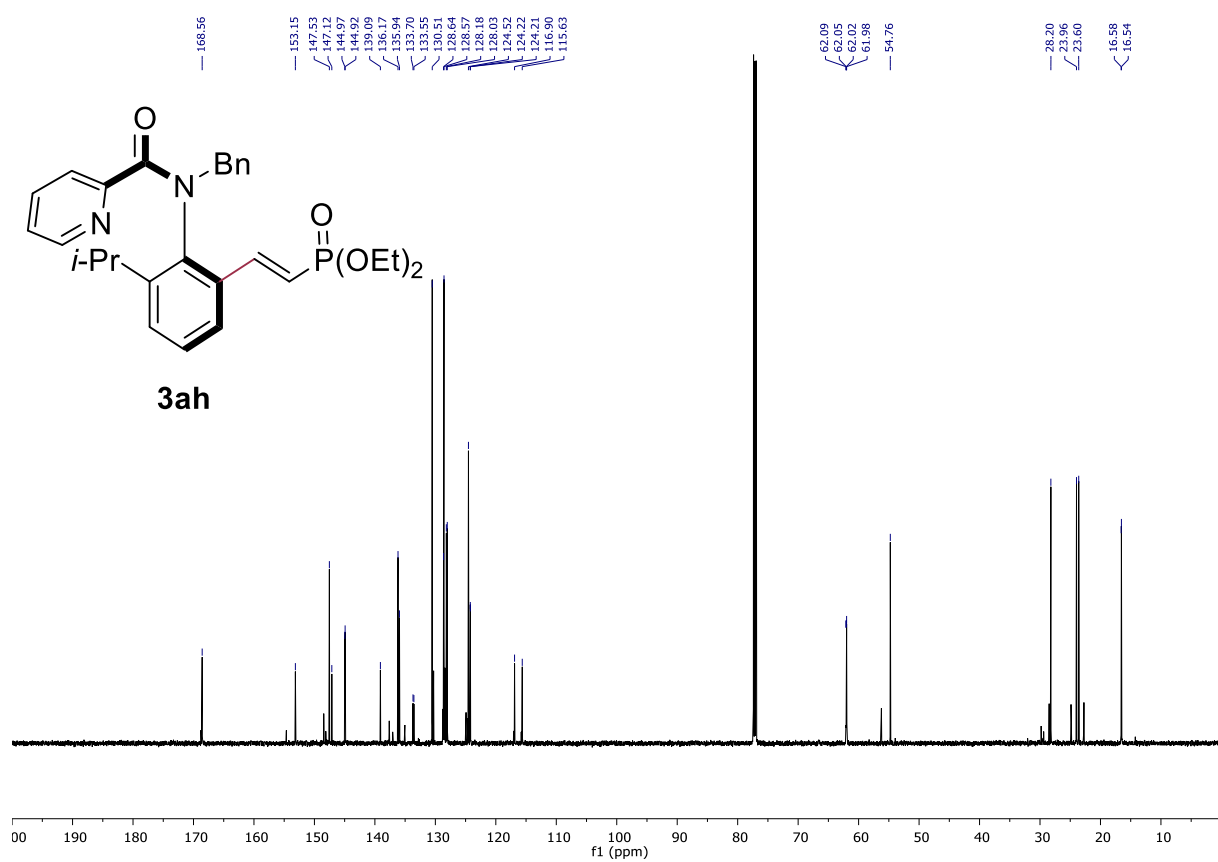

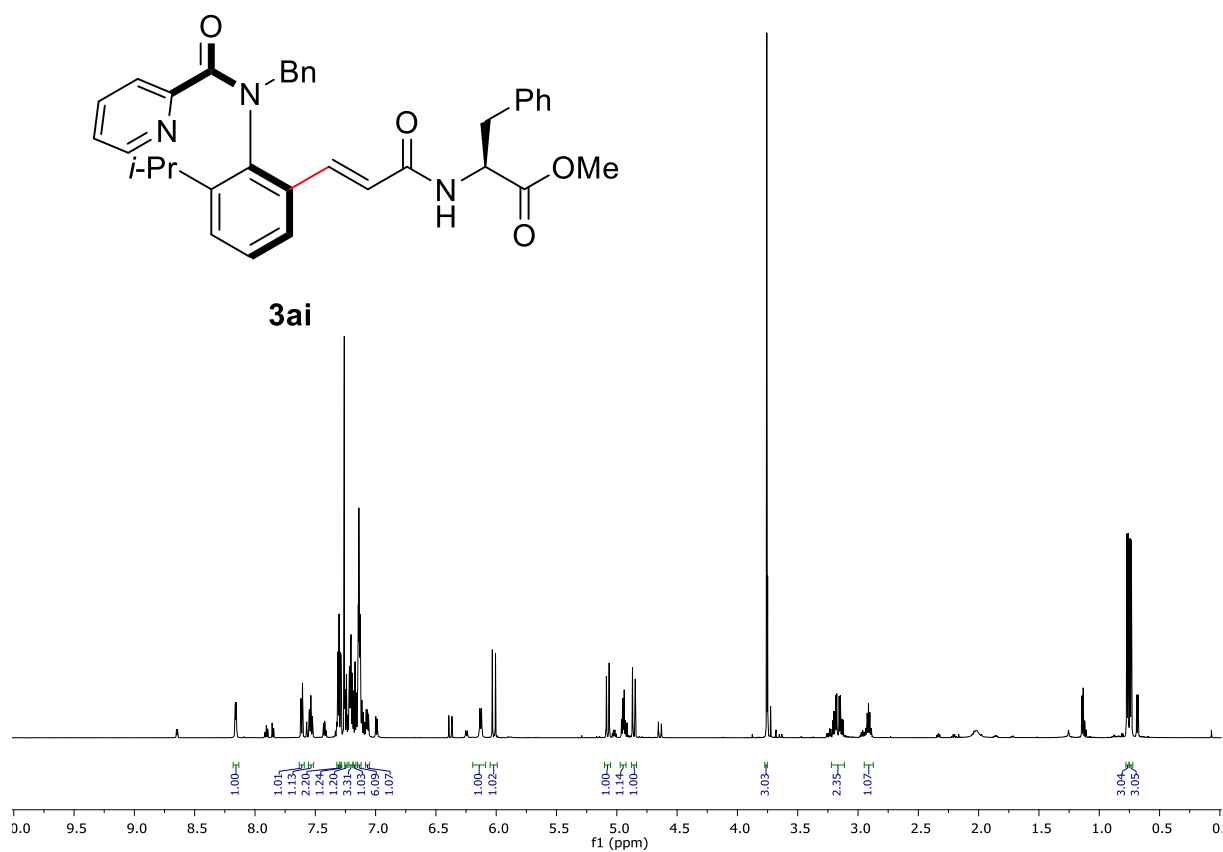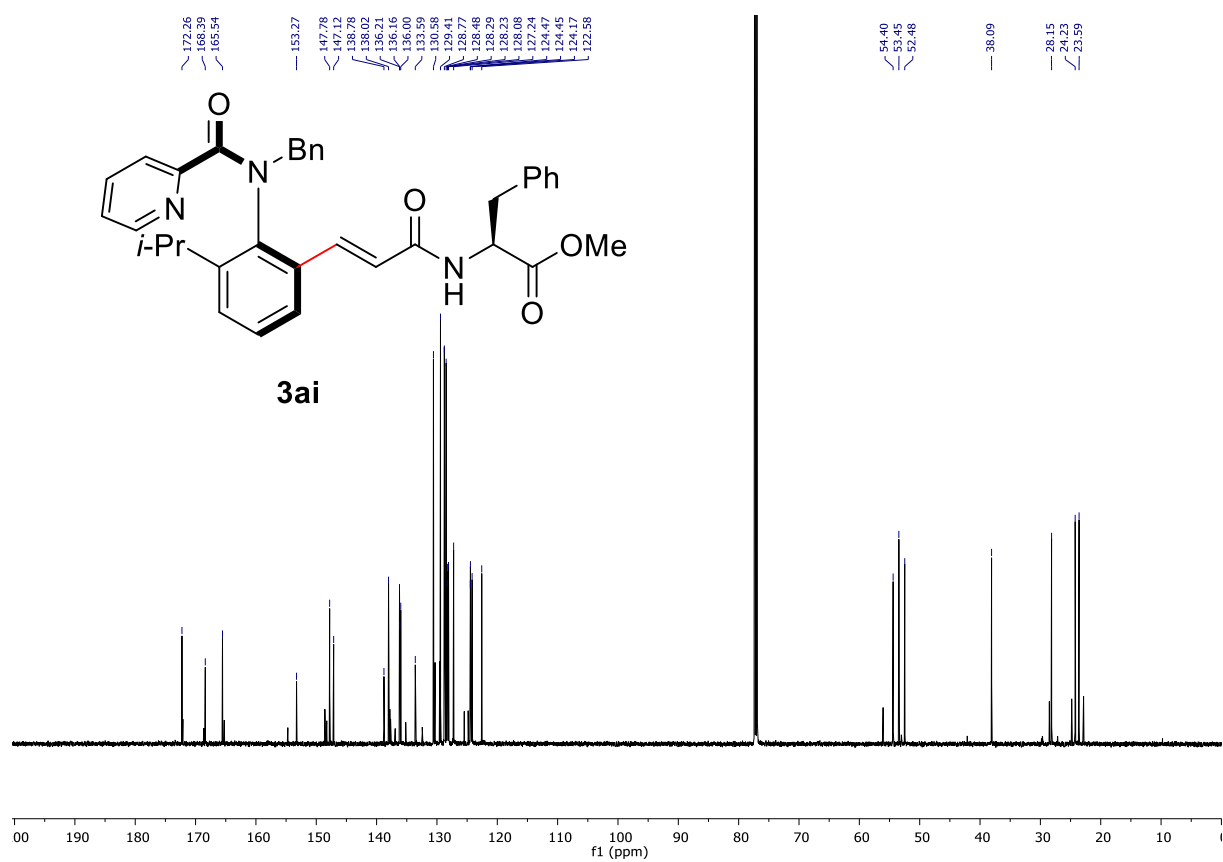

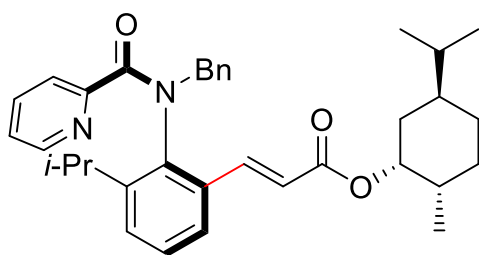

**3aj**

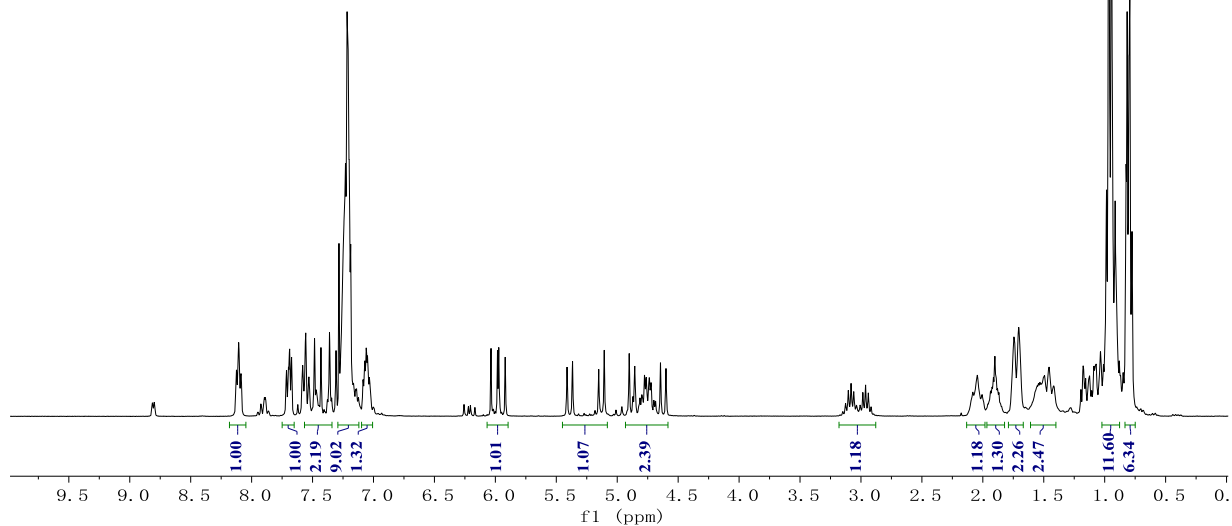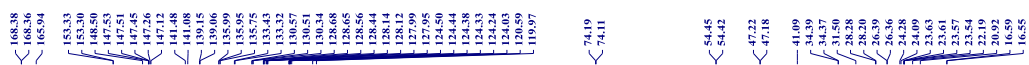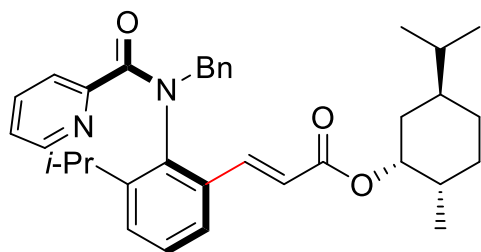

**3aj**

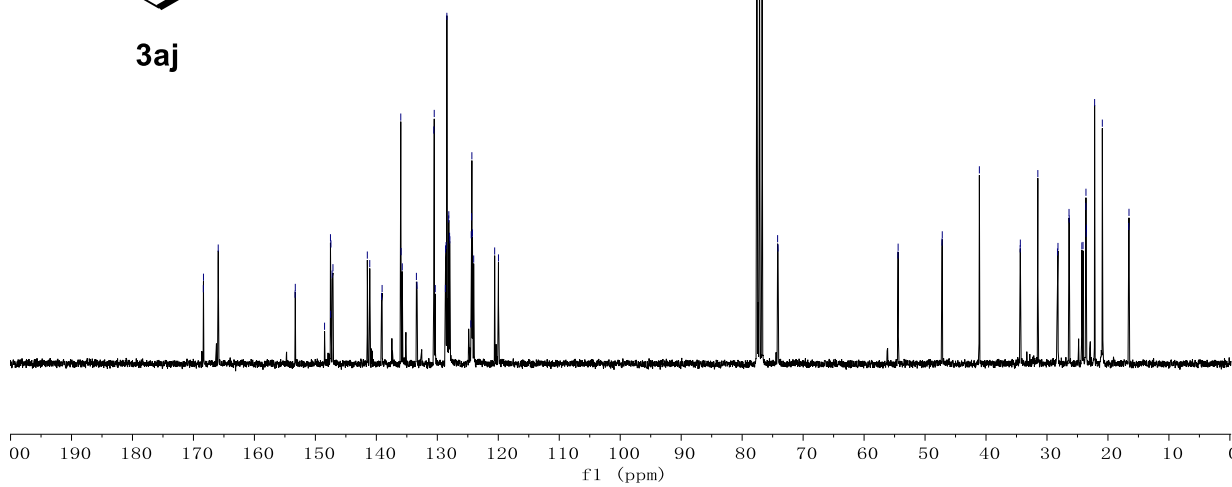

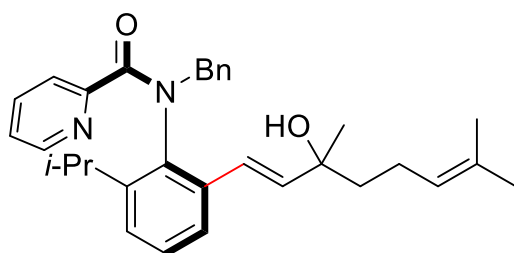

**3ak**  
**Diastereoisomer 1**

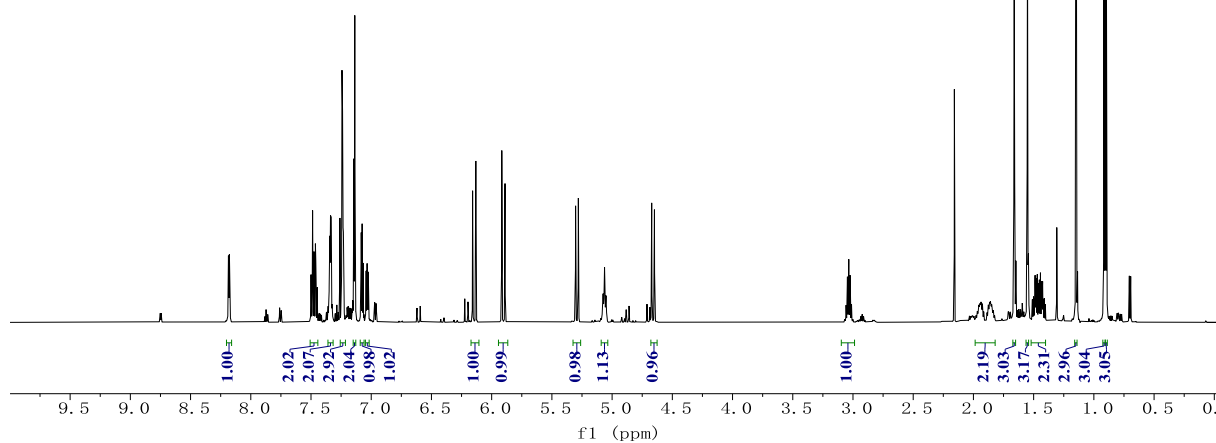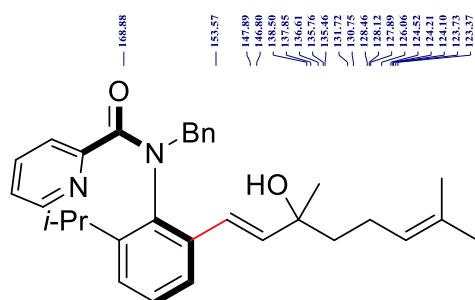

**3ak**  
**Diastereoisomer 1**

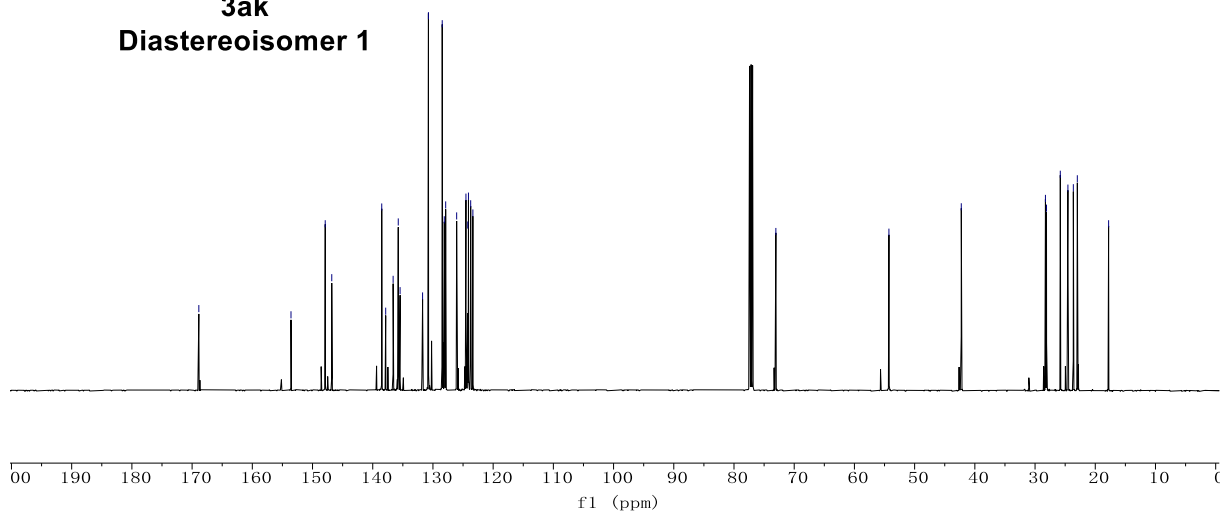

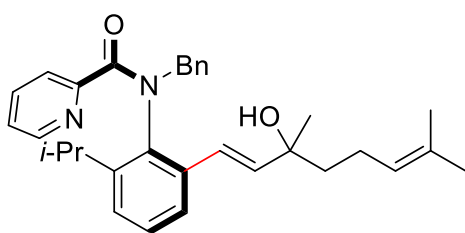

**3ak**  
**Diastereoisomer 2**

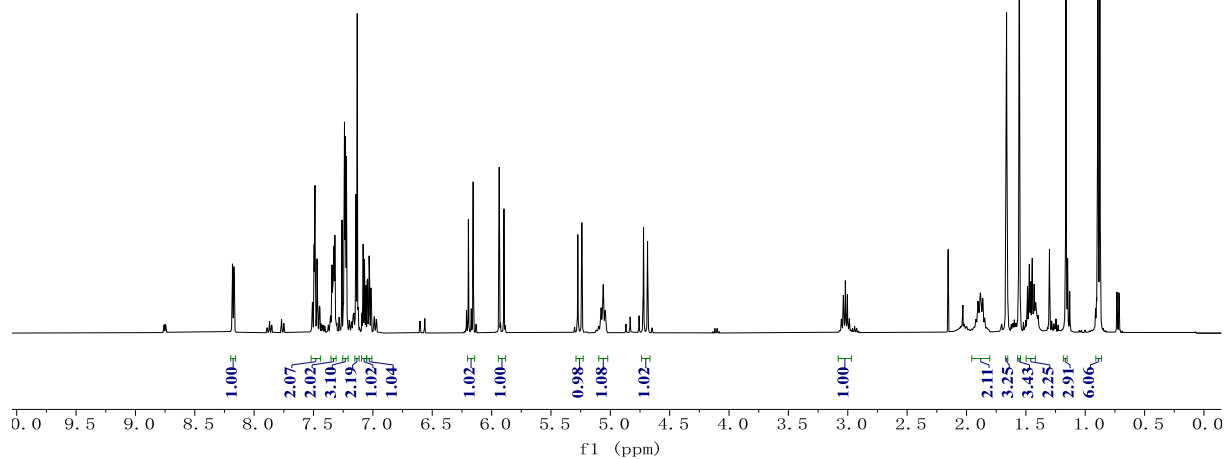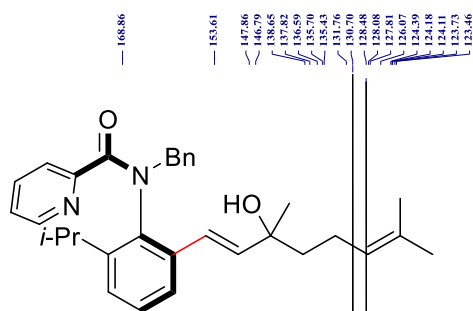

**3ak**  
**Diastereoisomer 2**

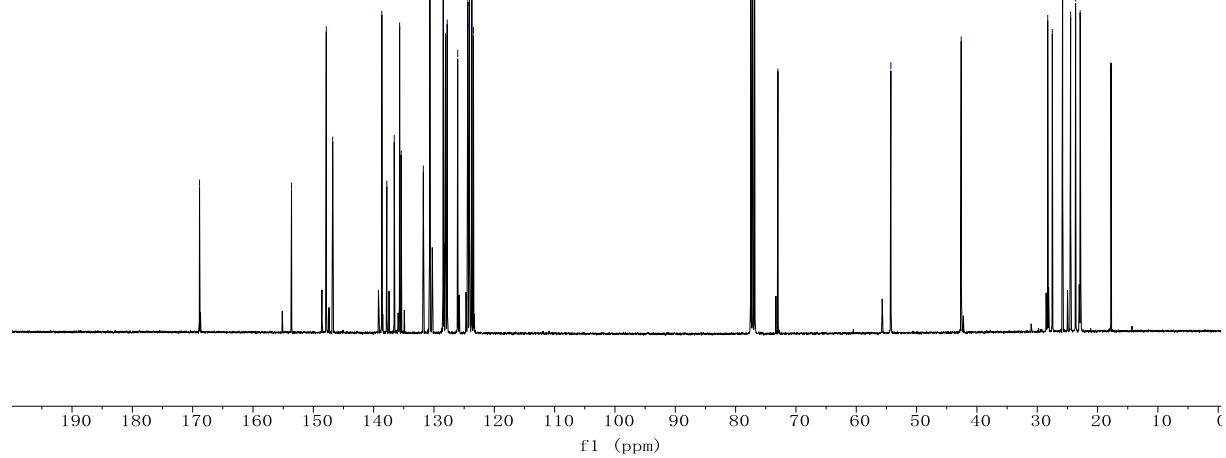

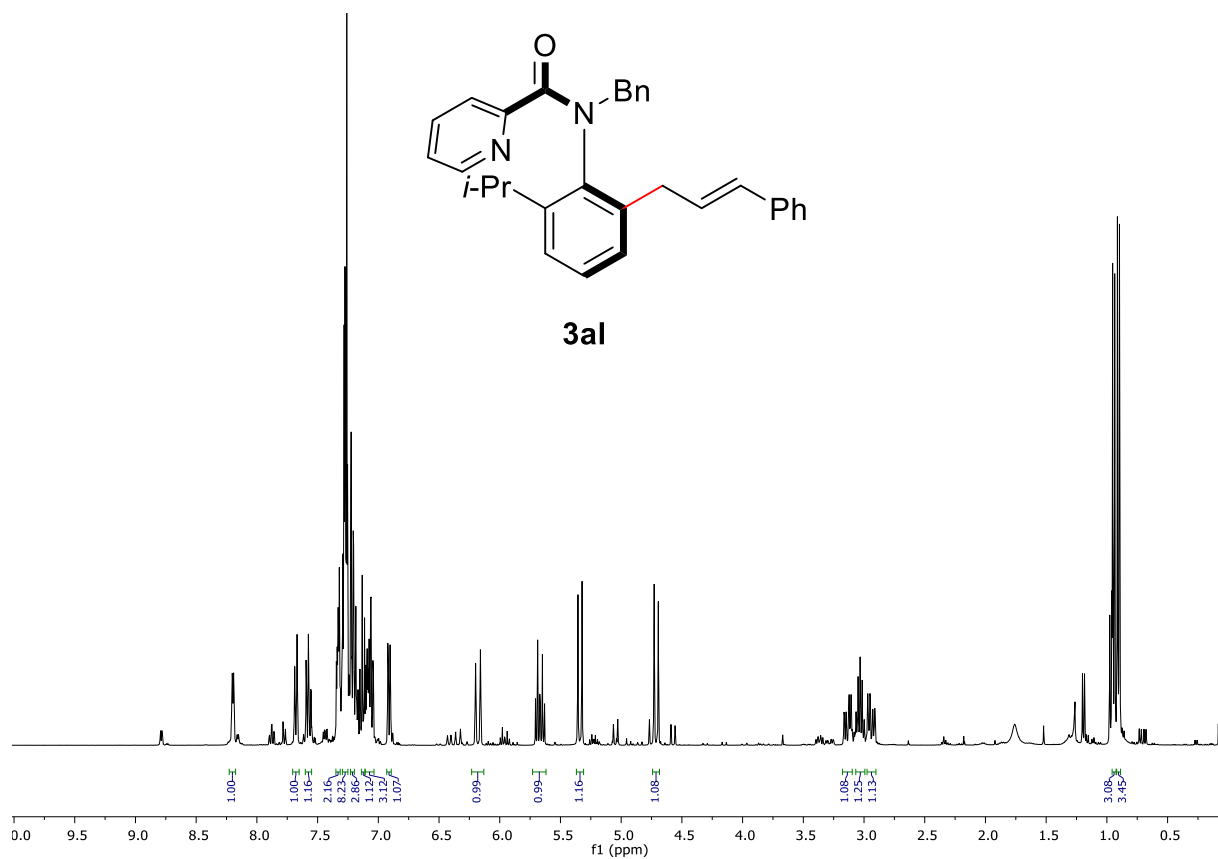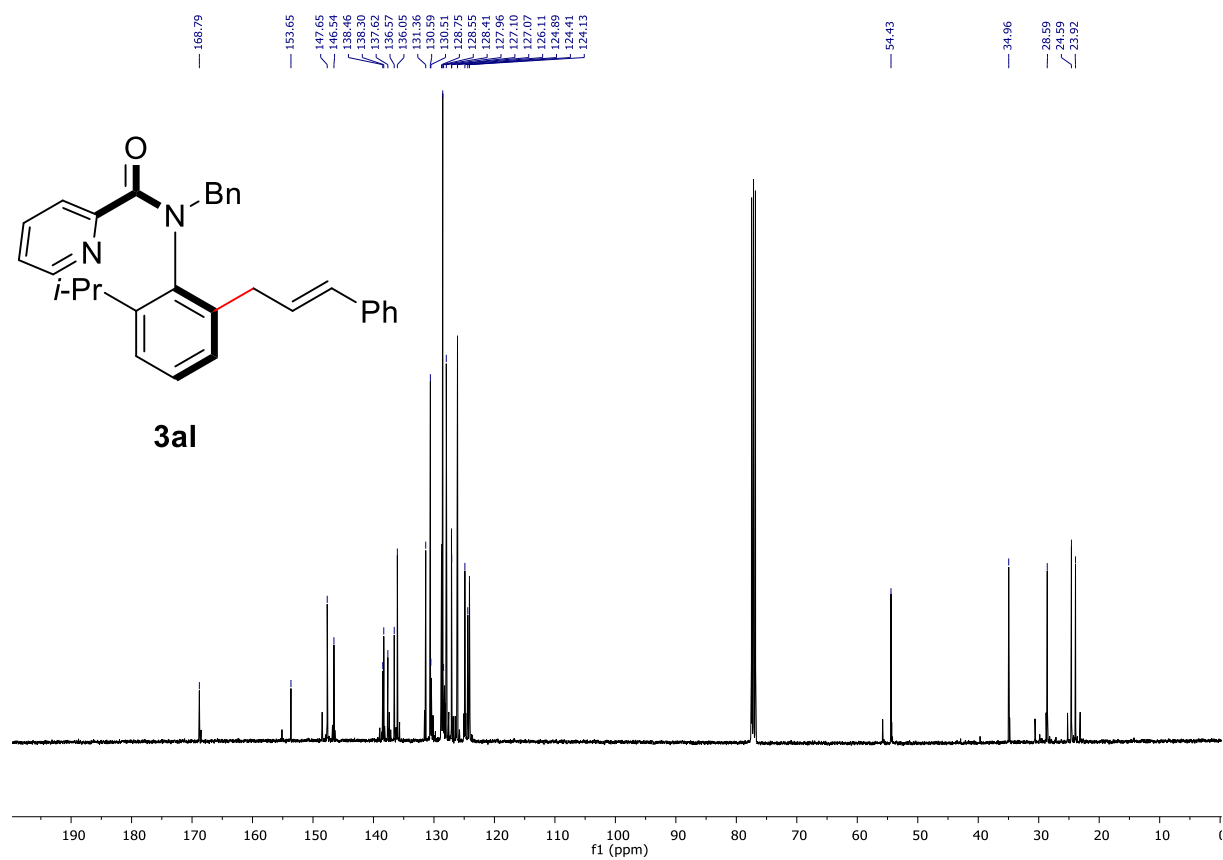

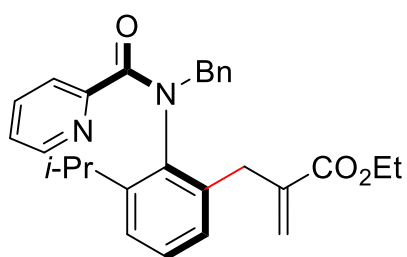

**3am**

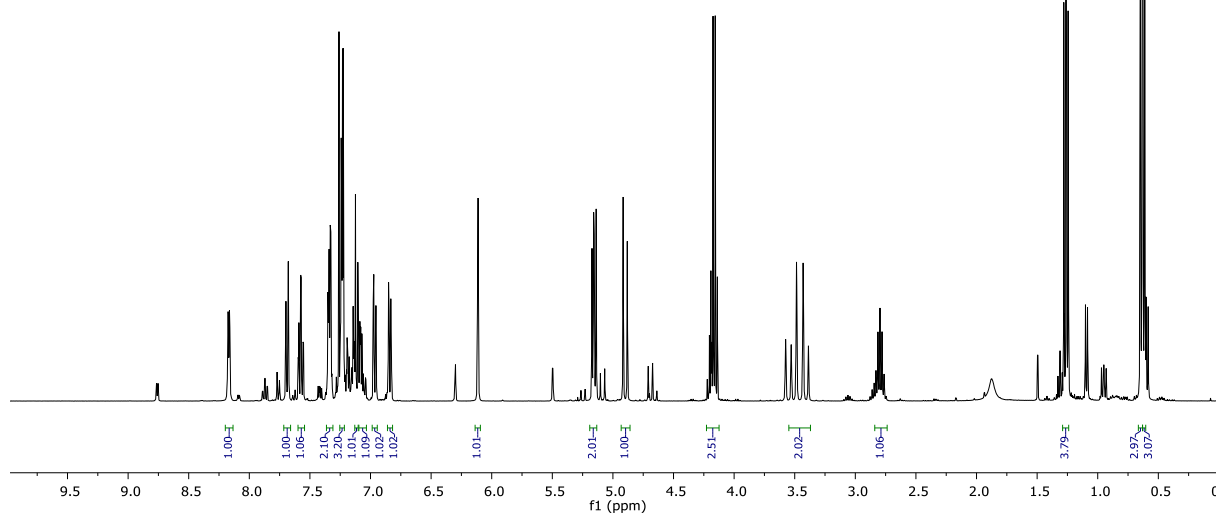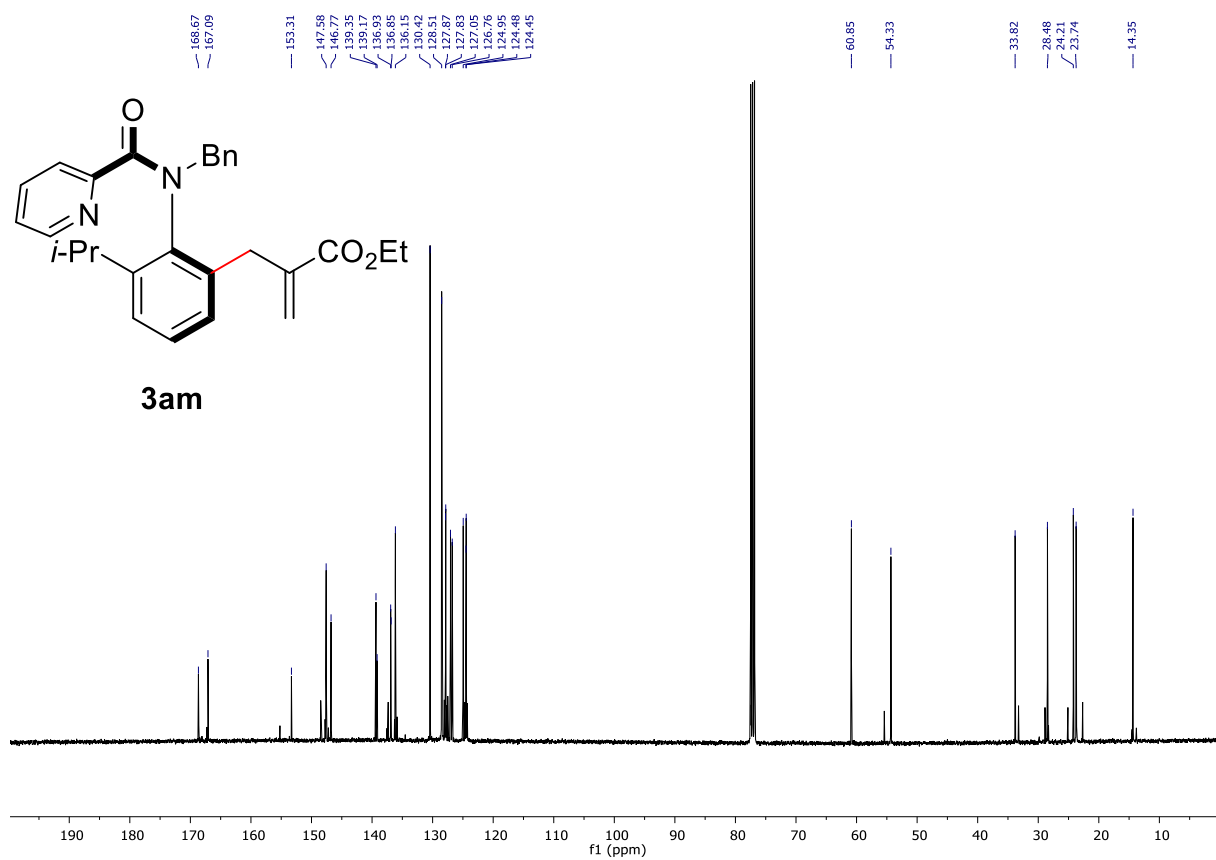

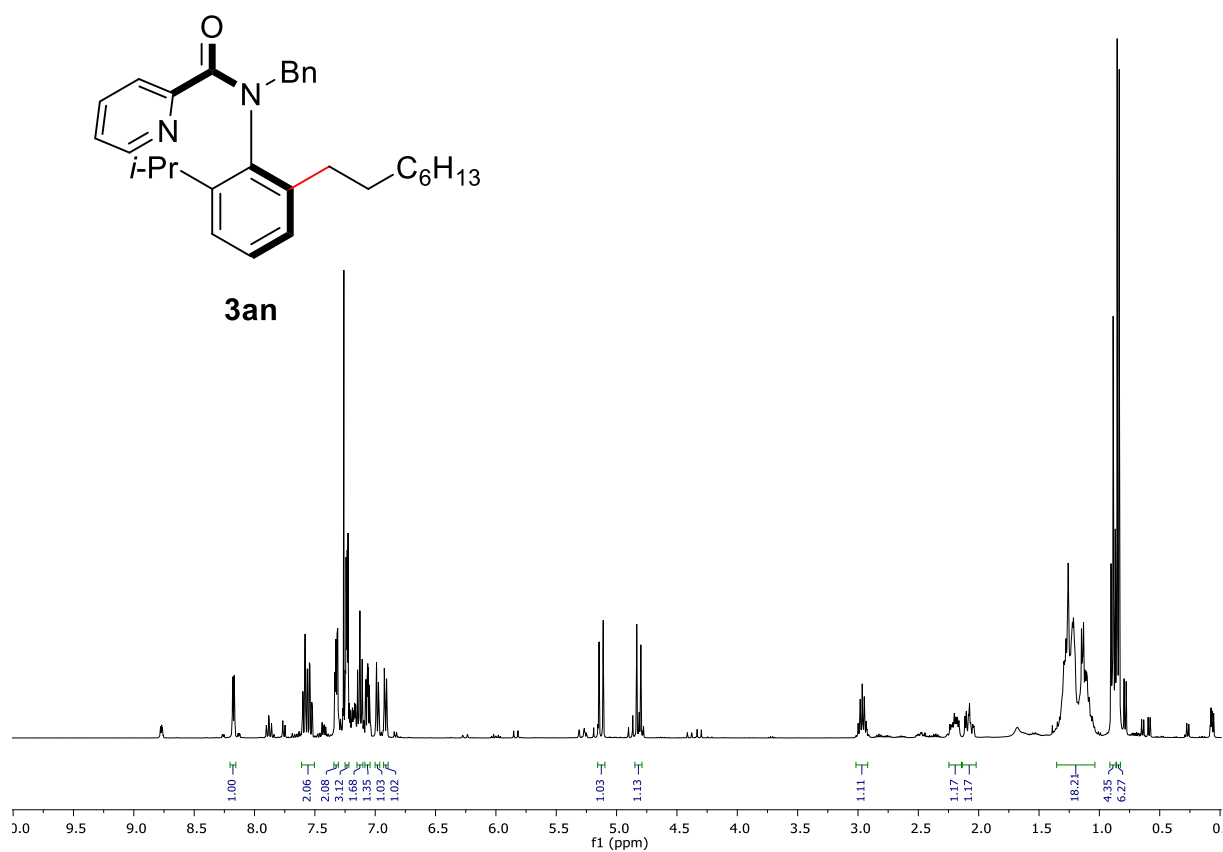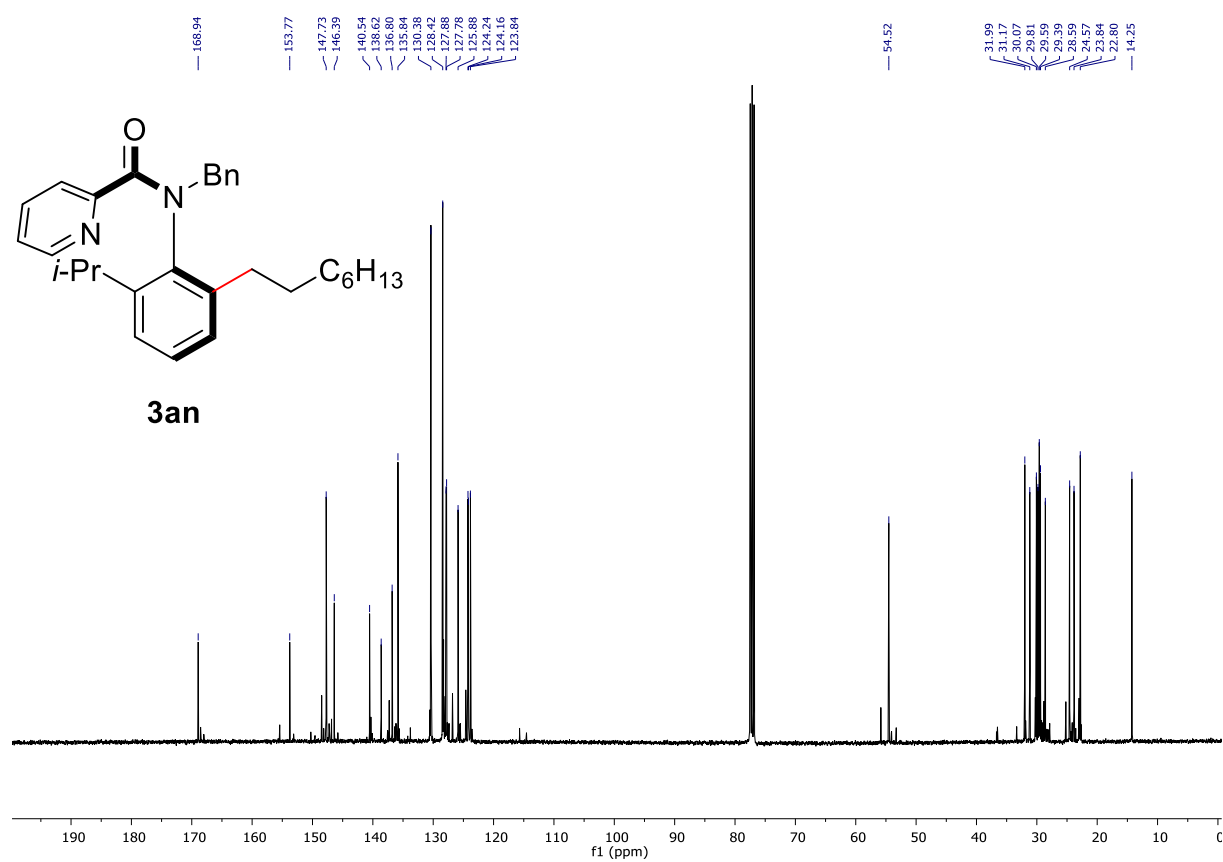



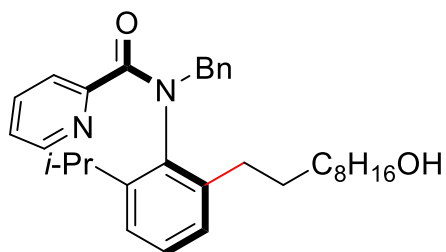

**3ao**

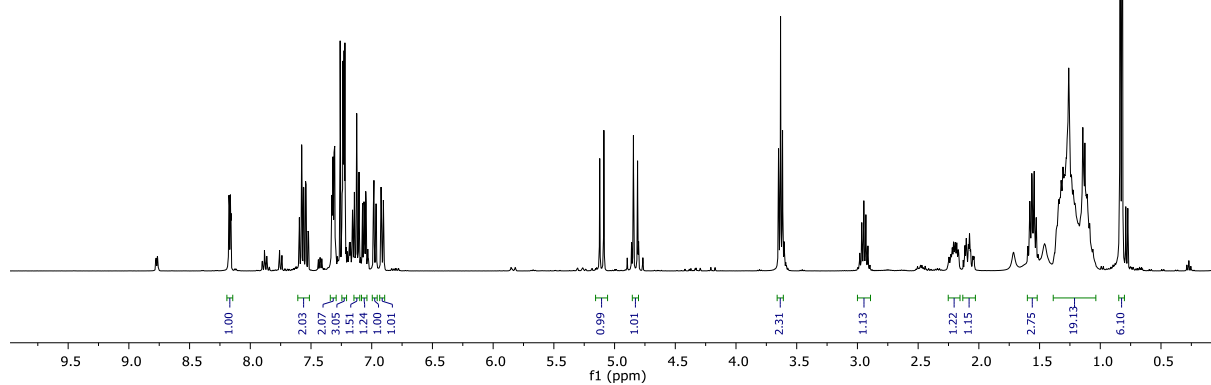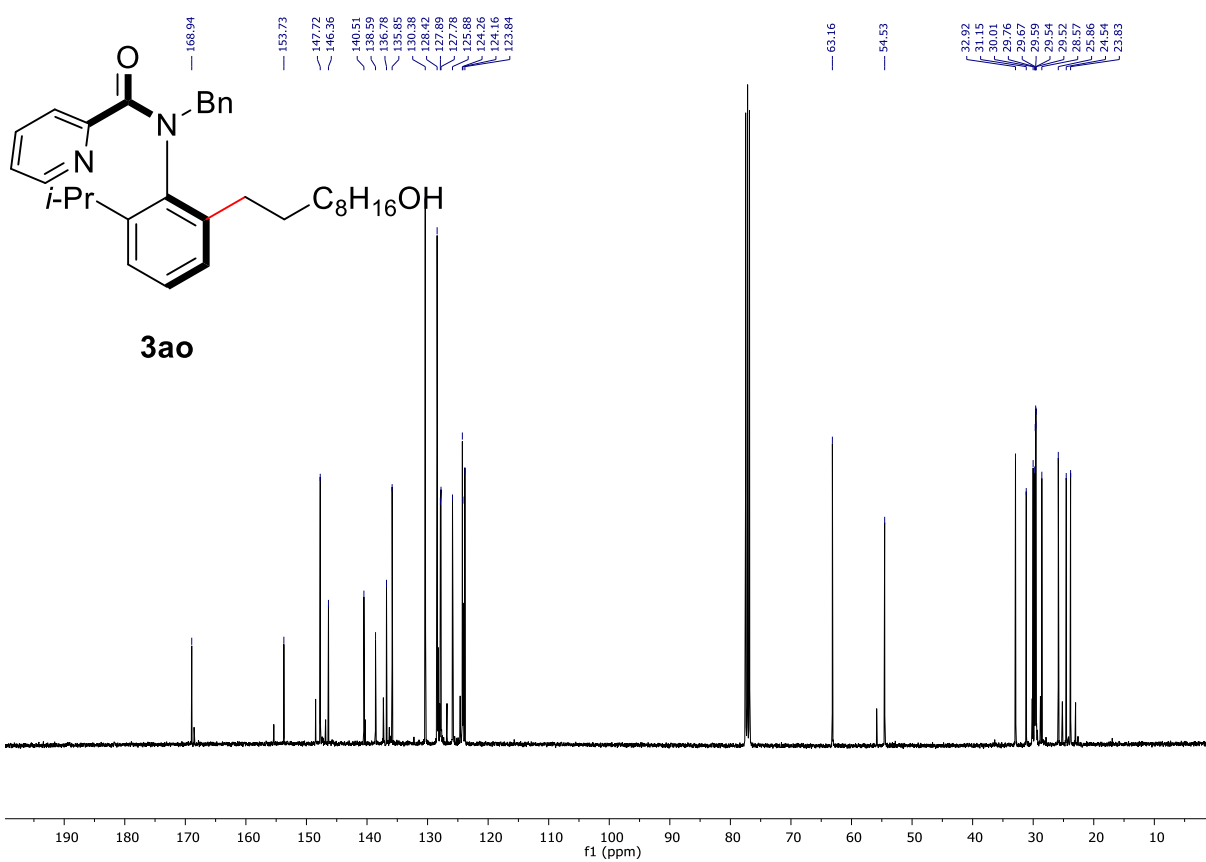

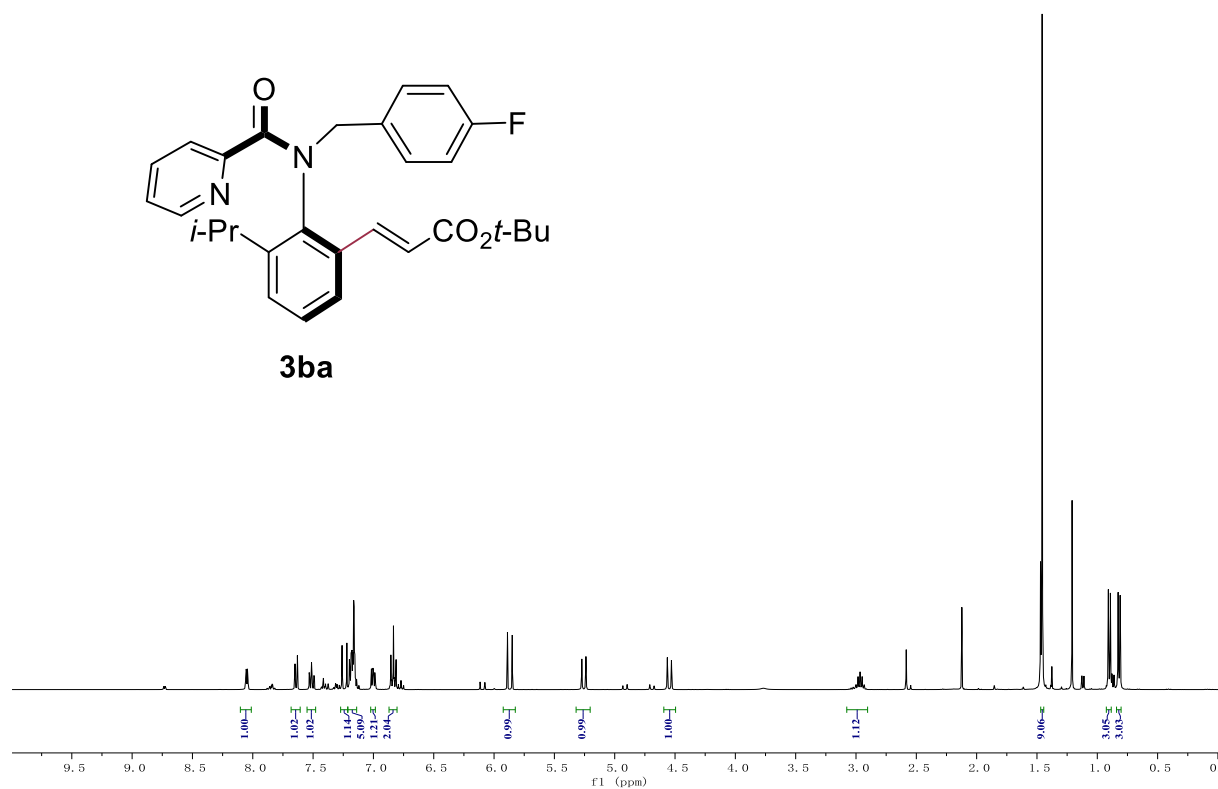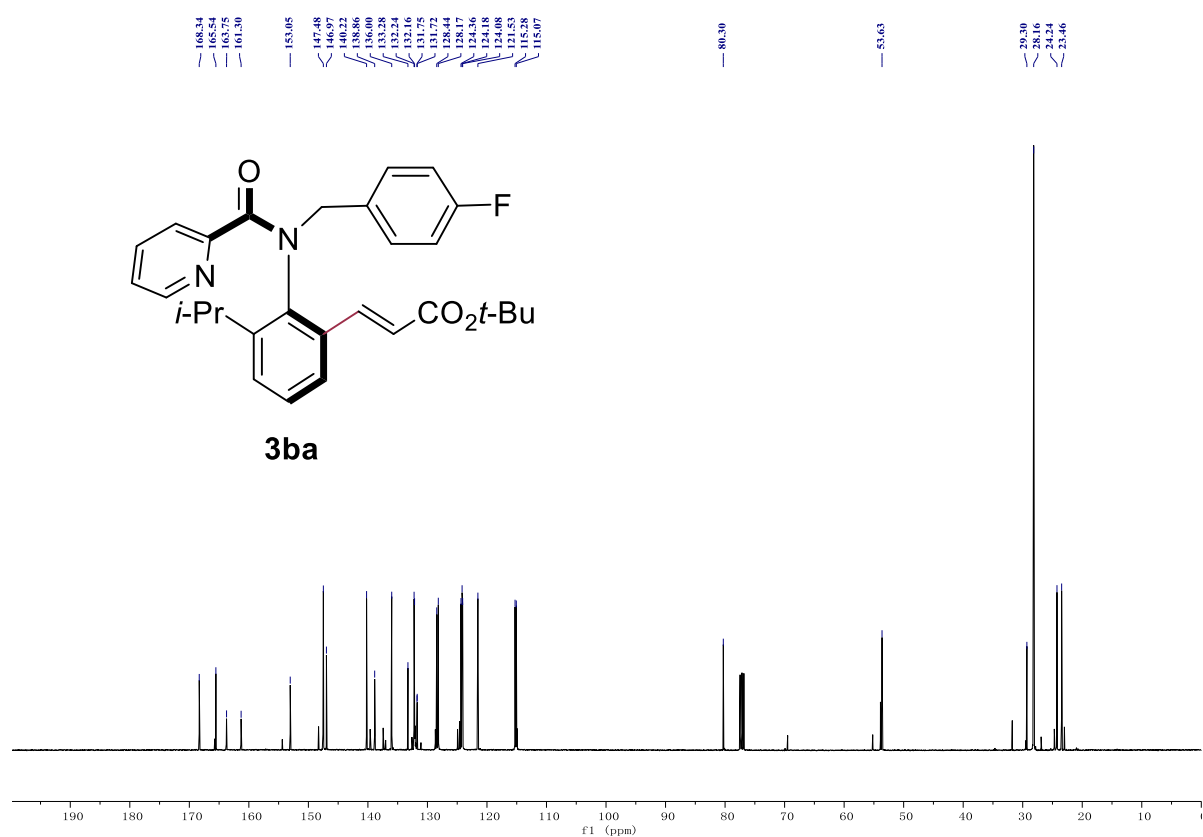

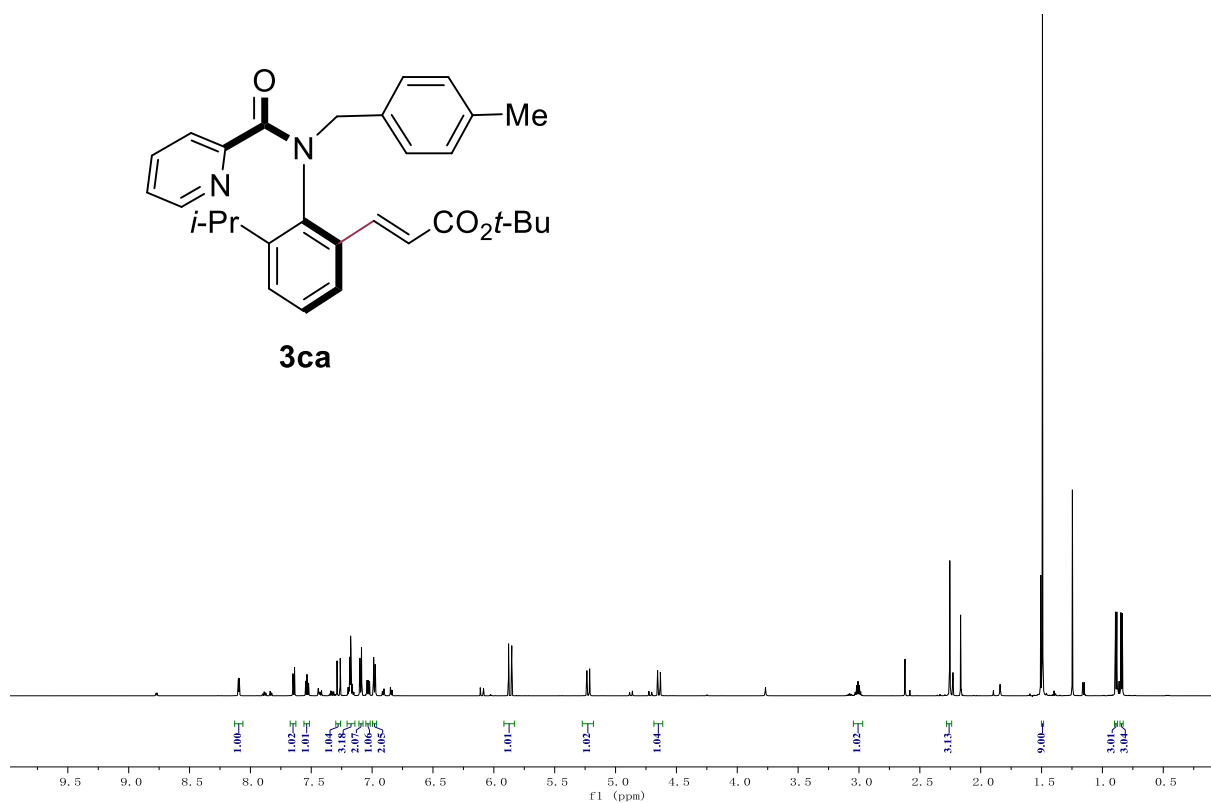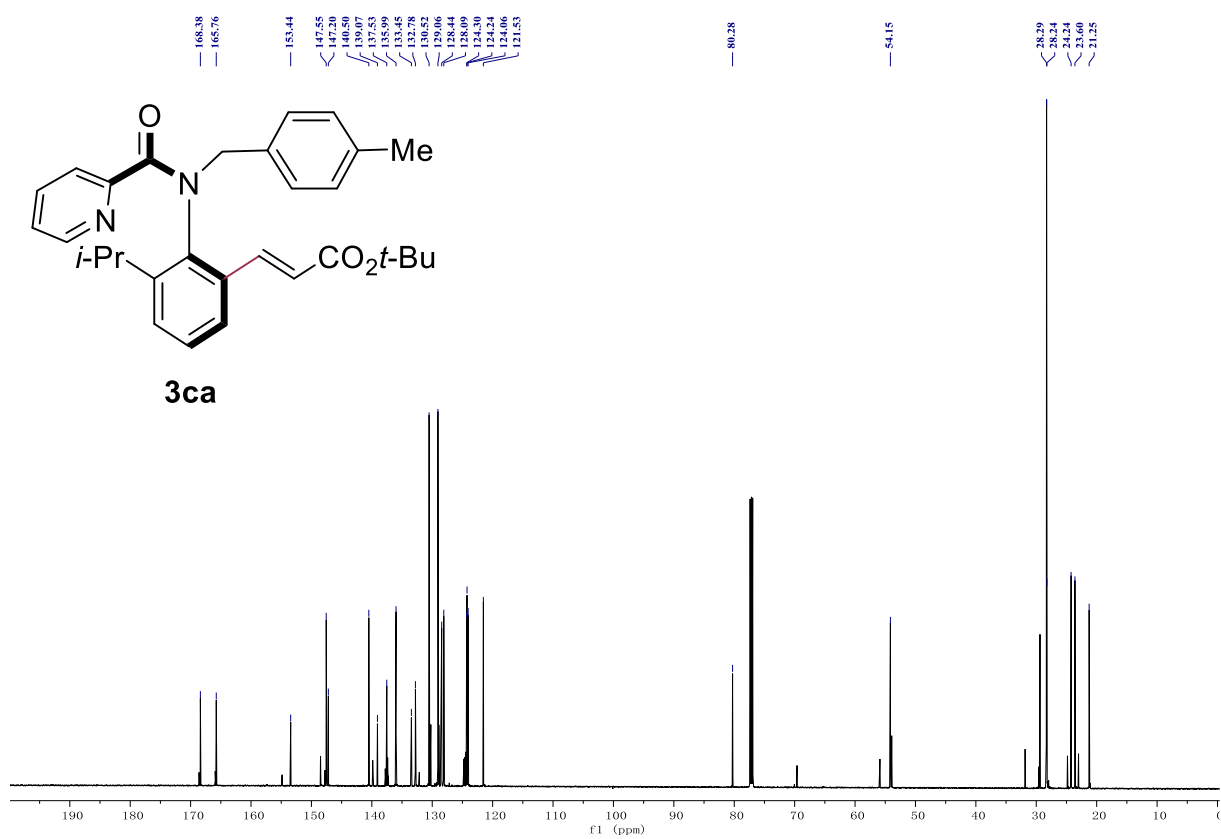

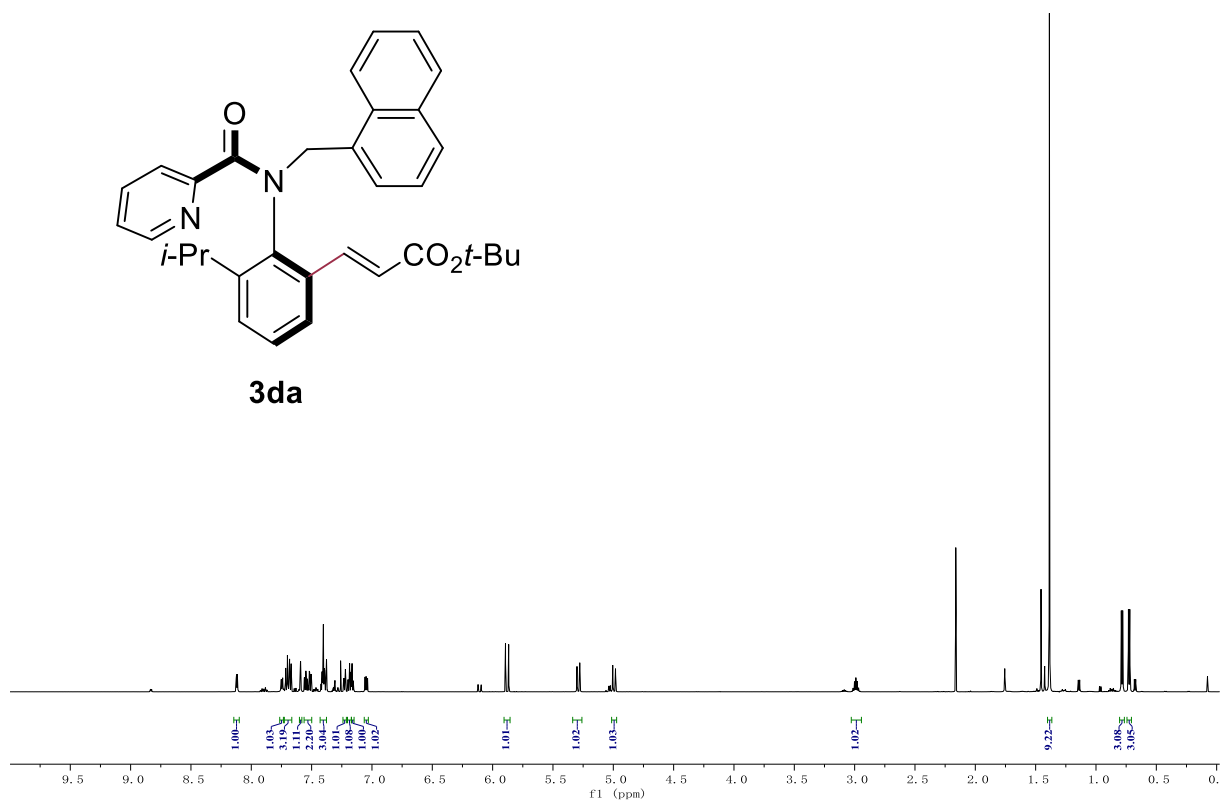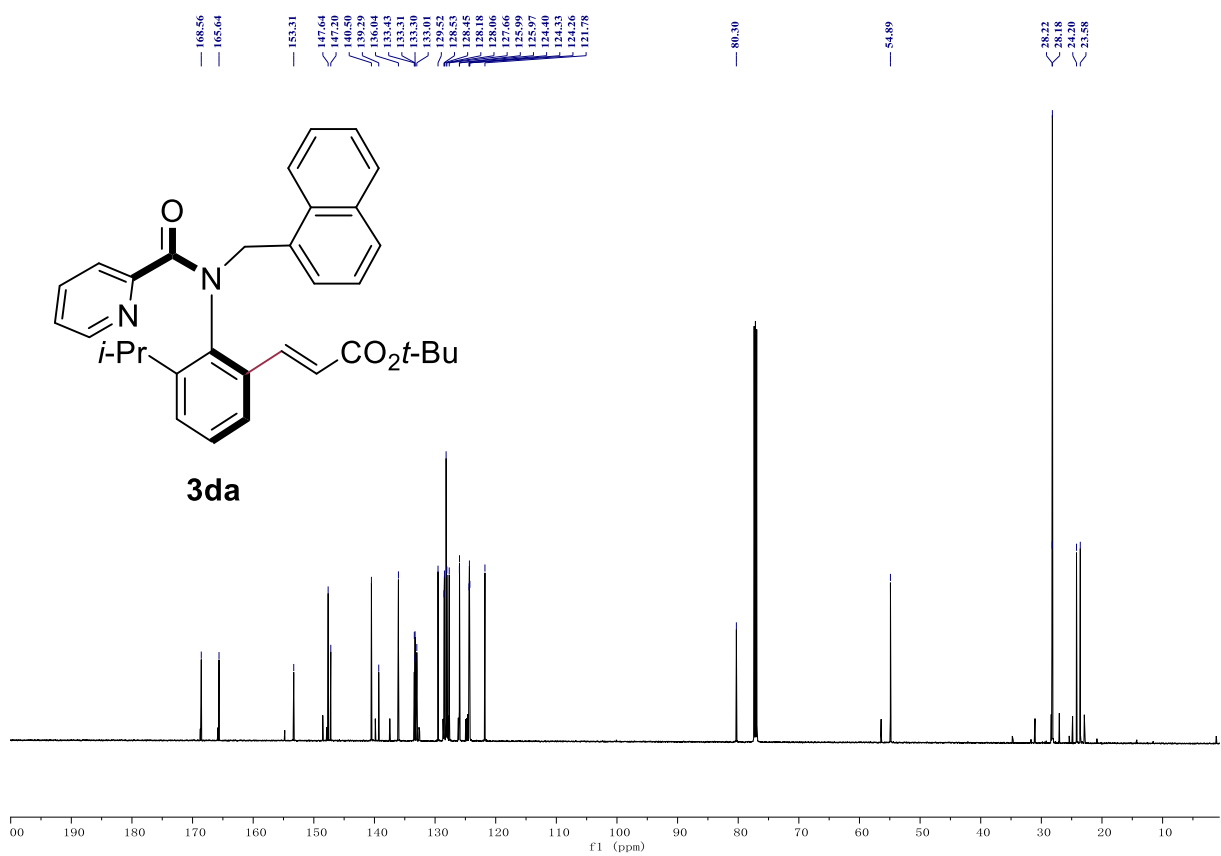

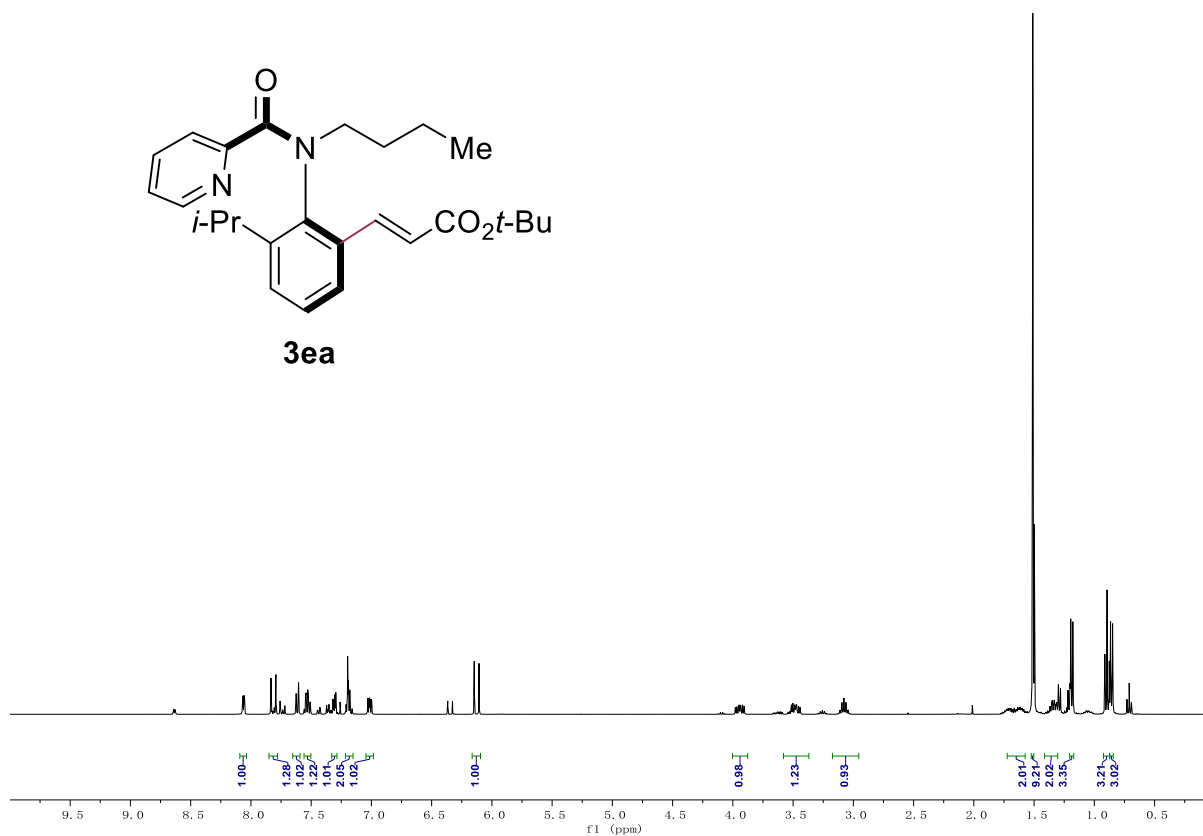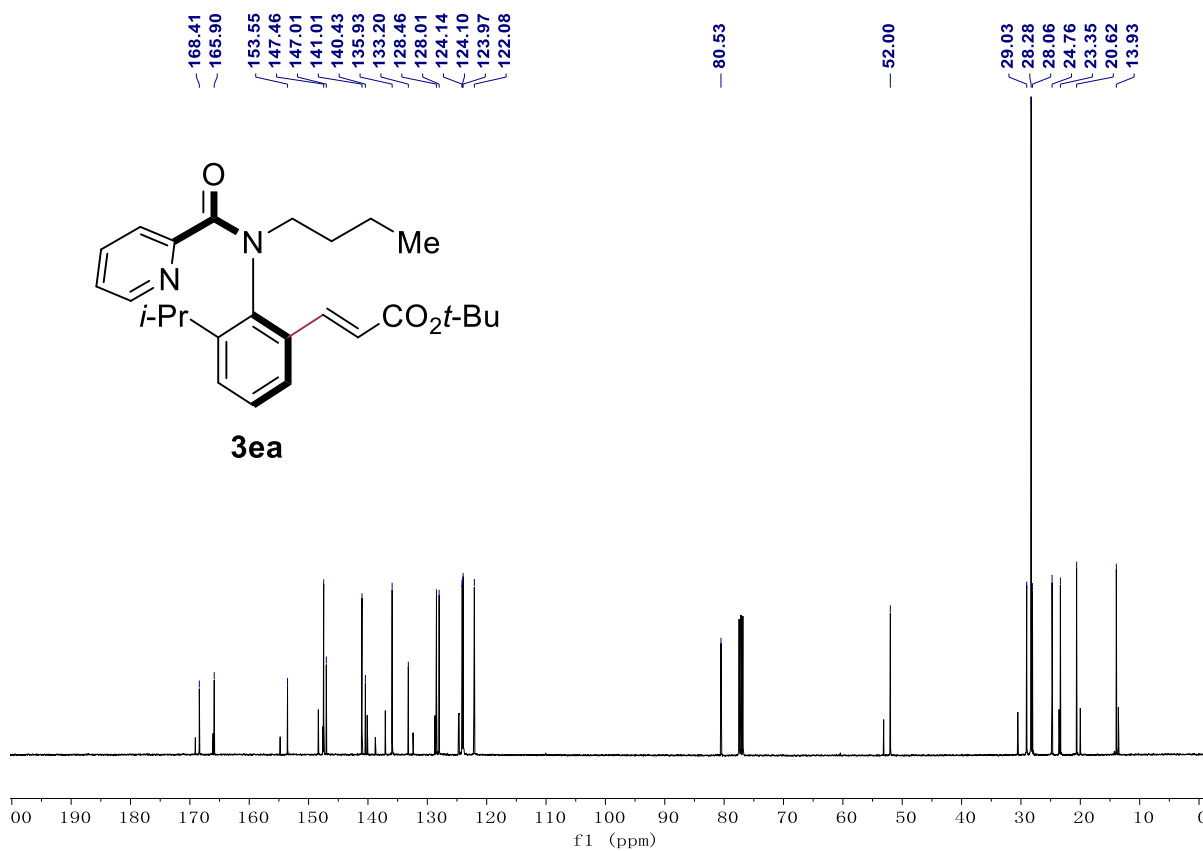

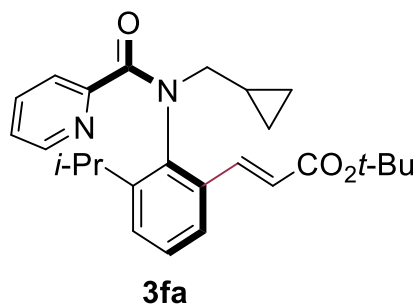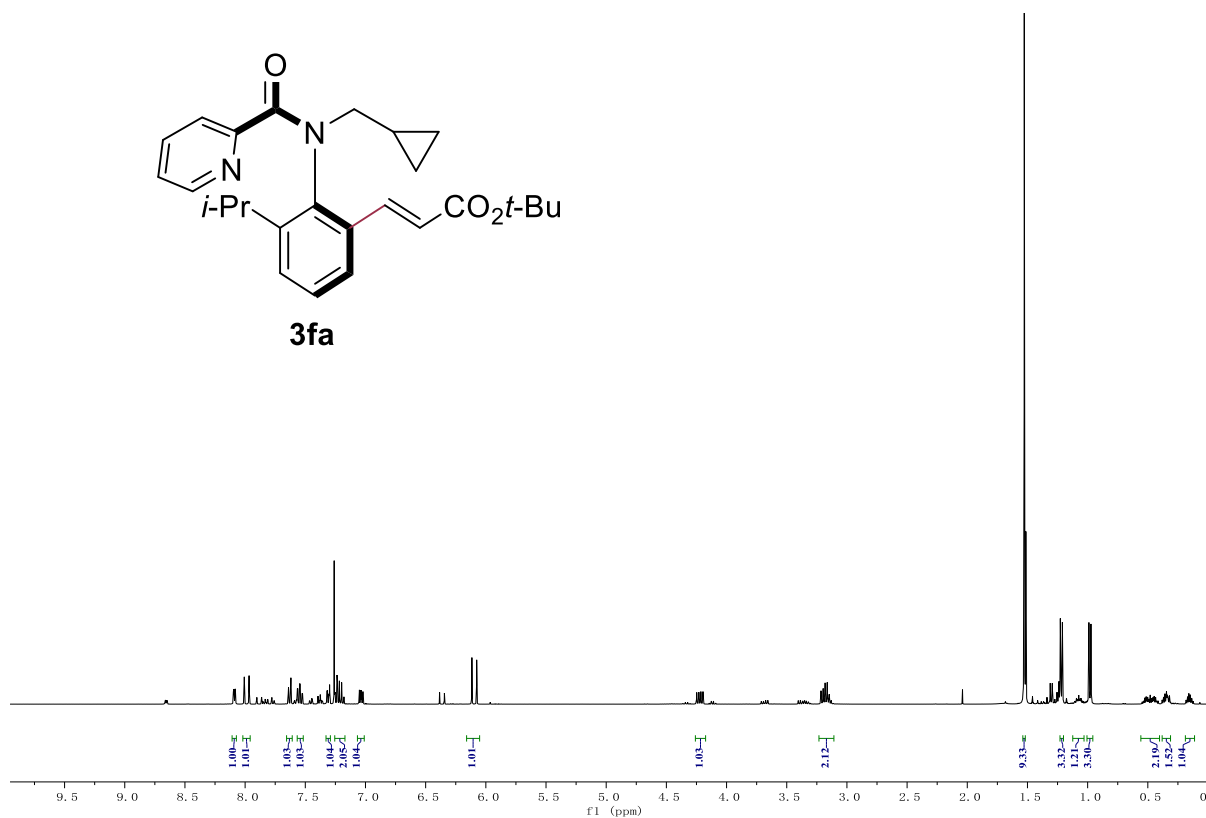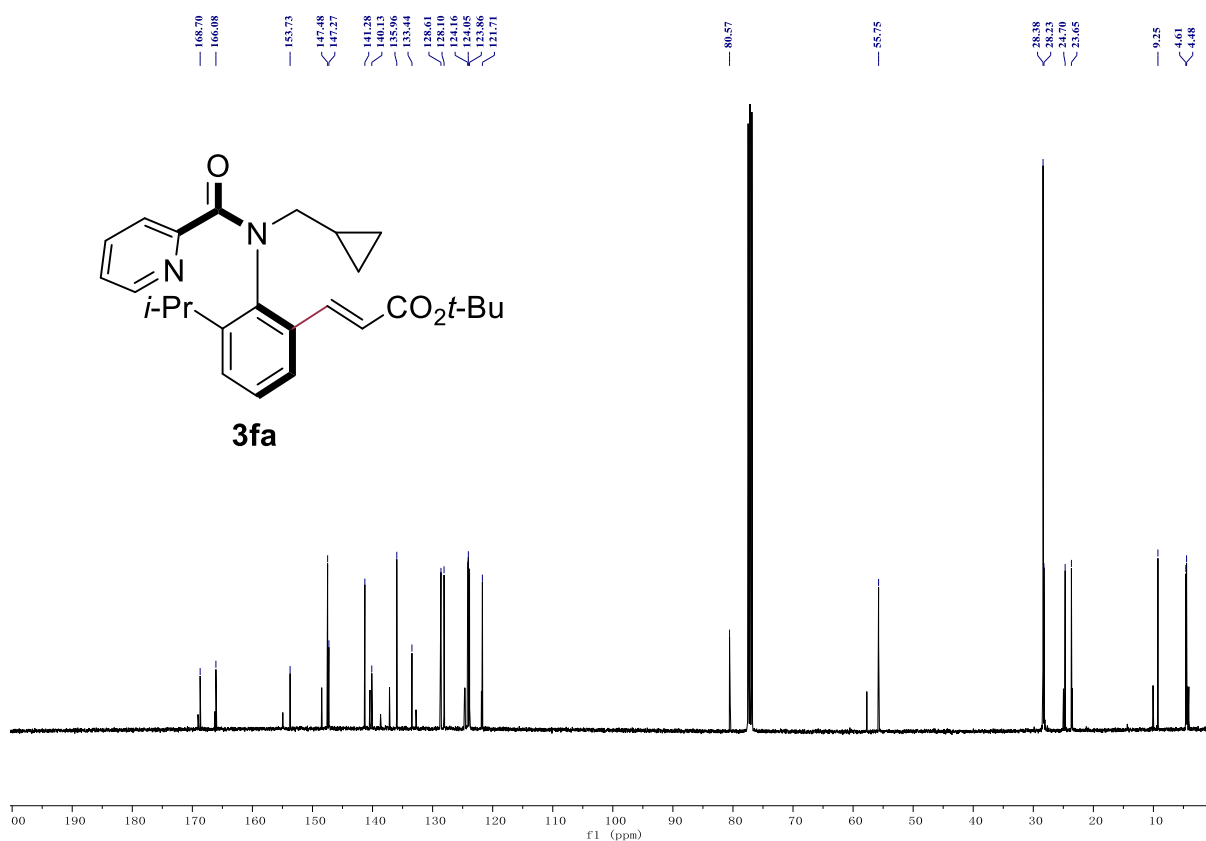

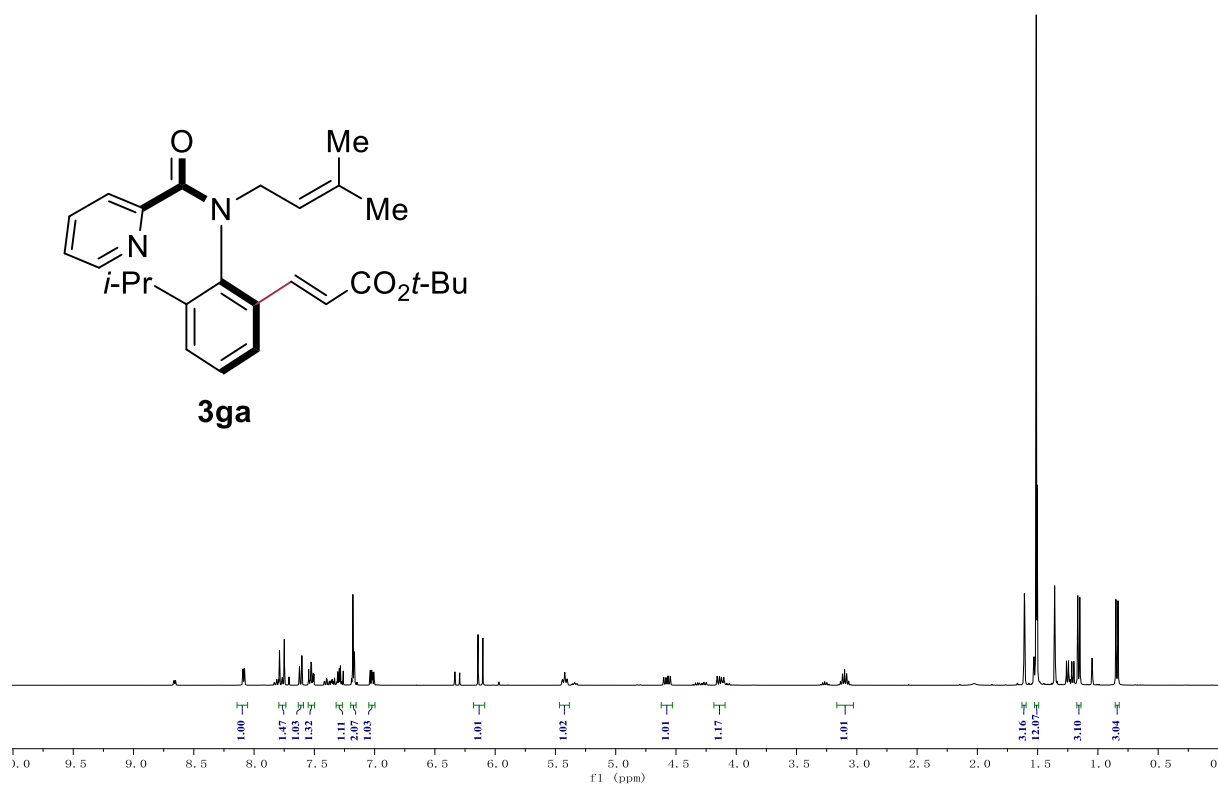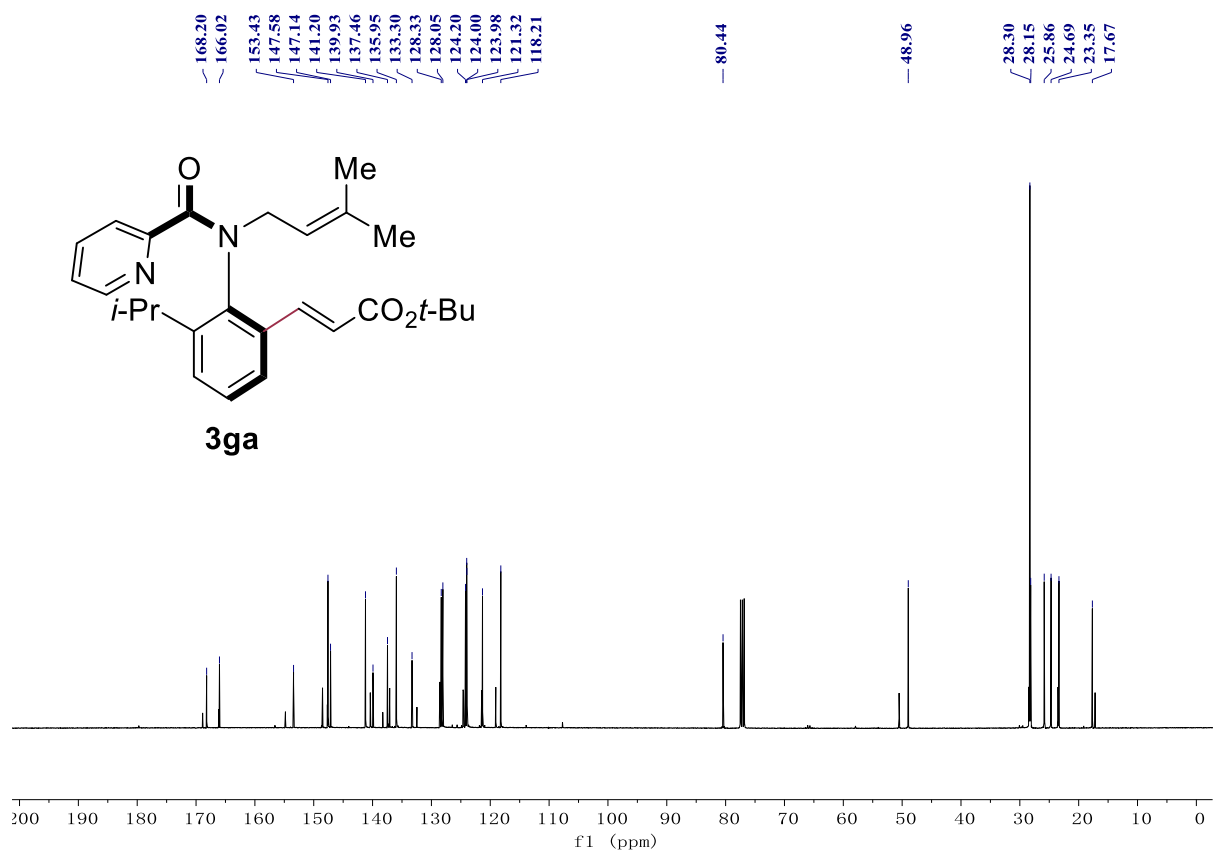

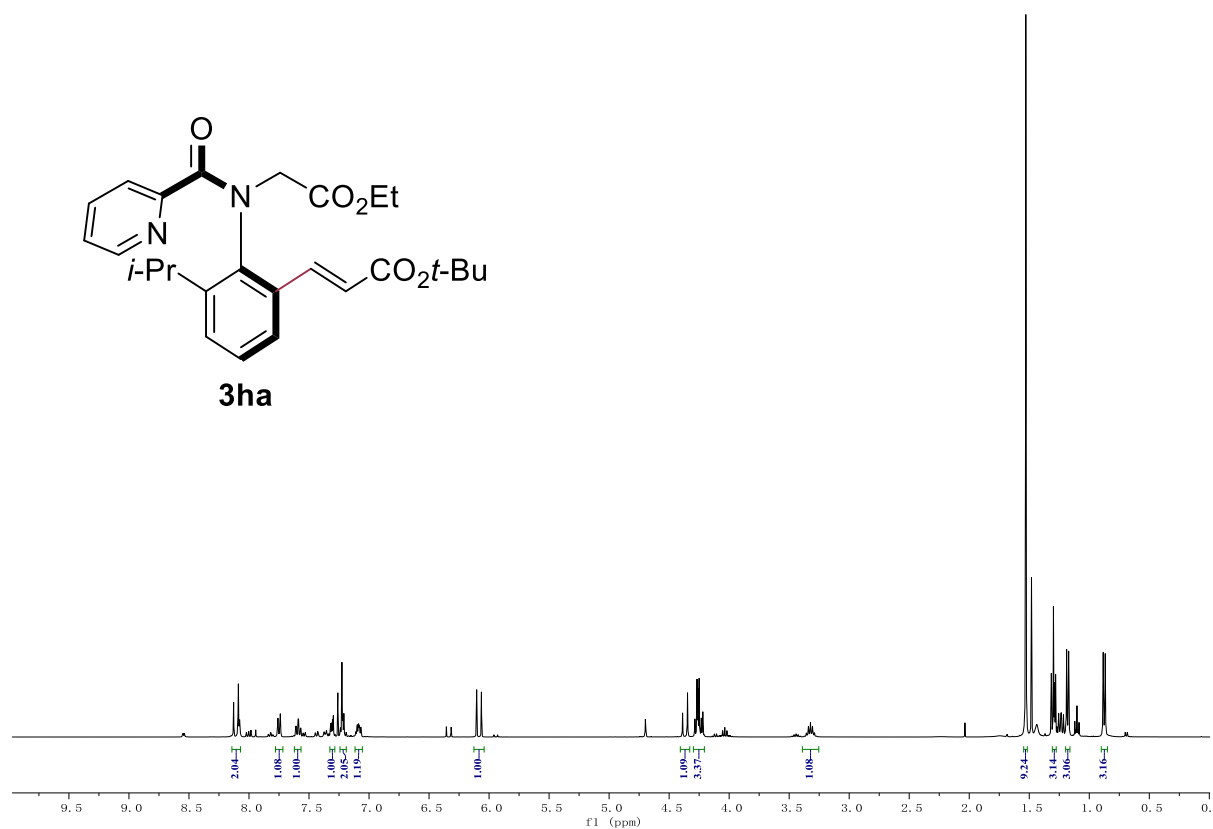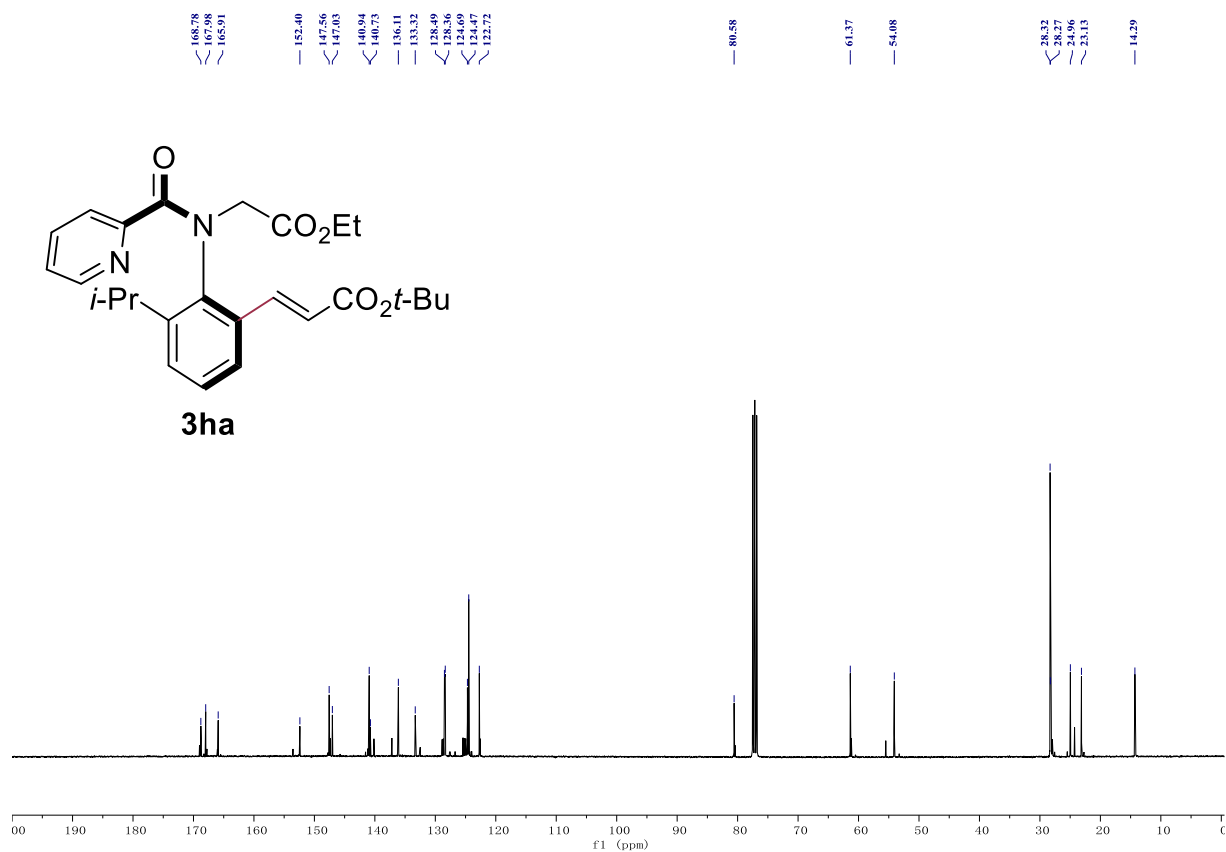



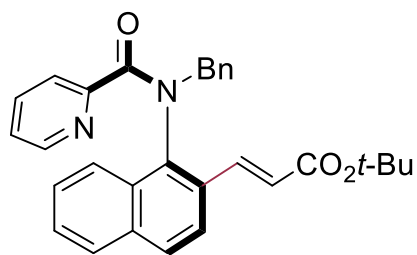

**3ia**

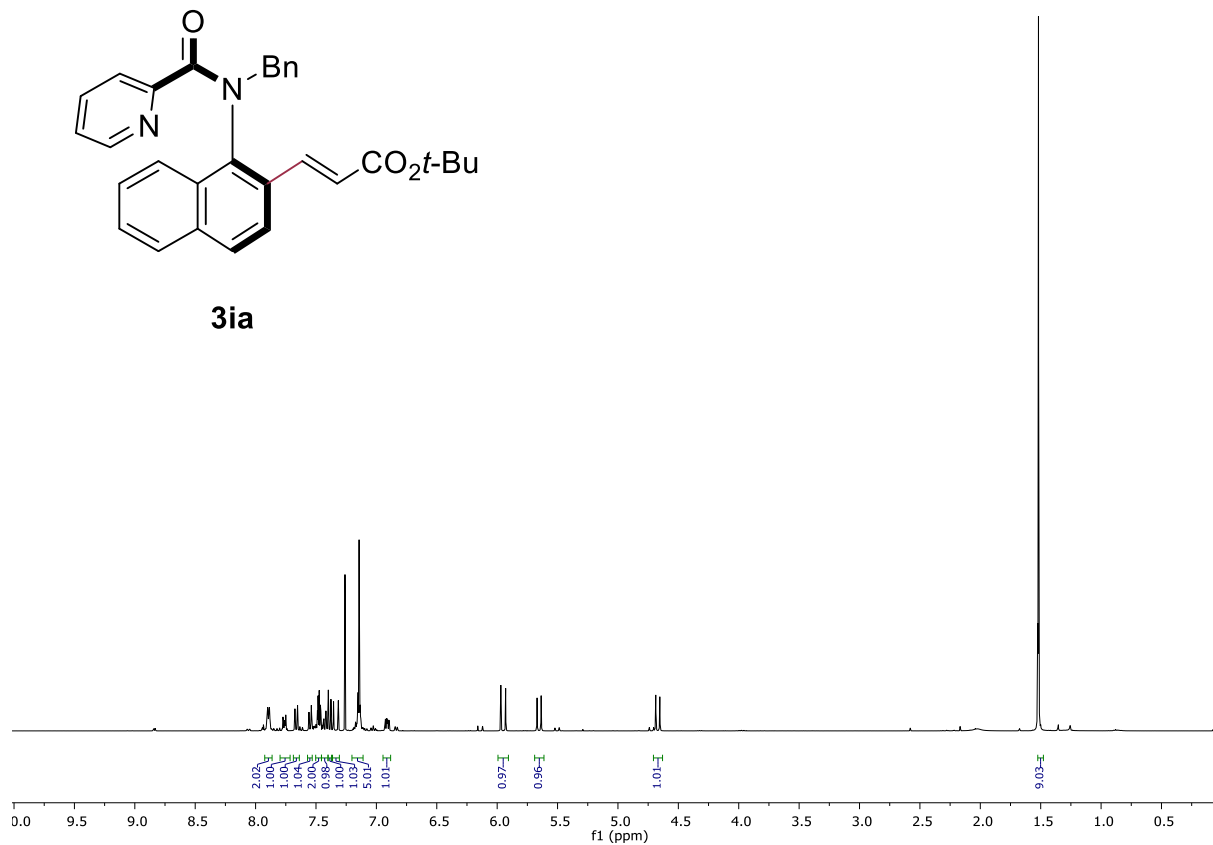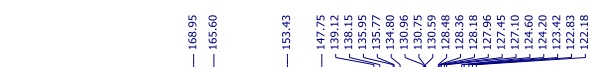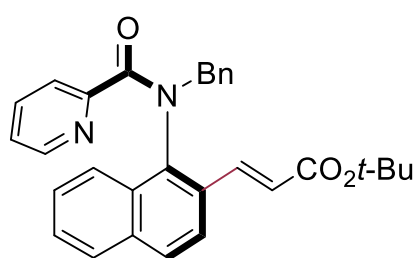

**3ia**

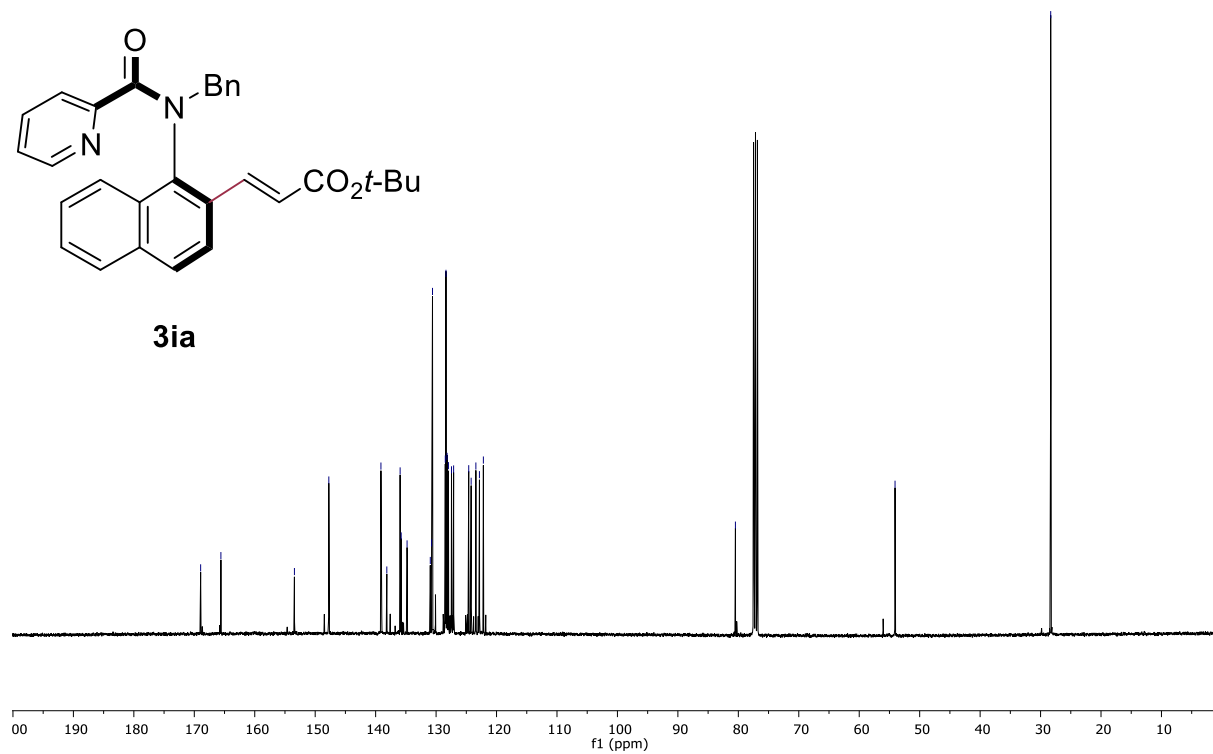

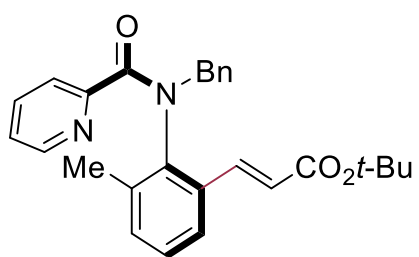

**3ja**

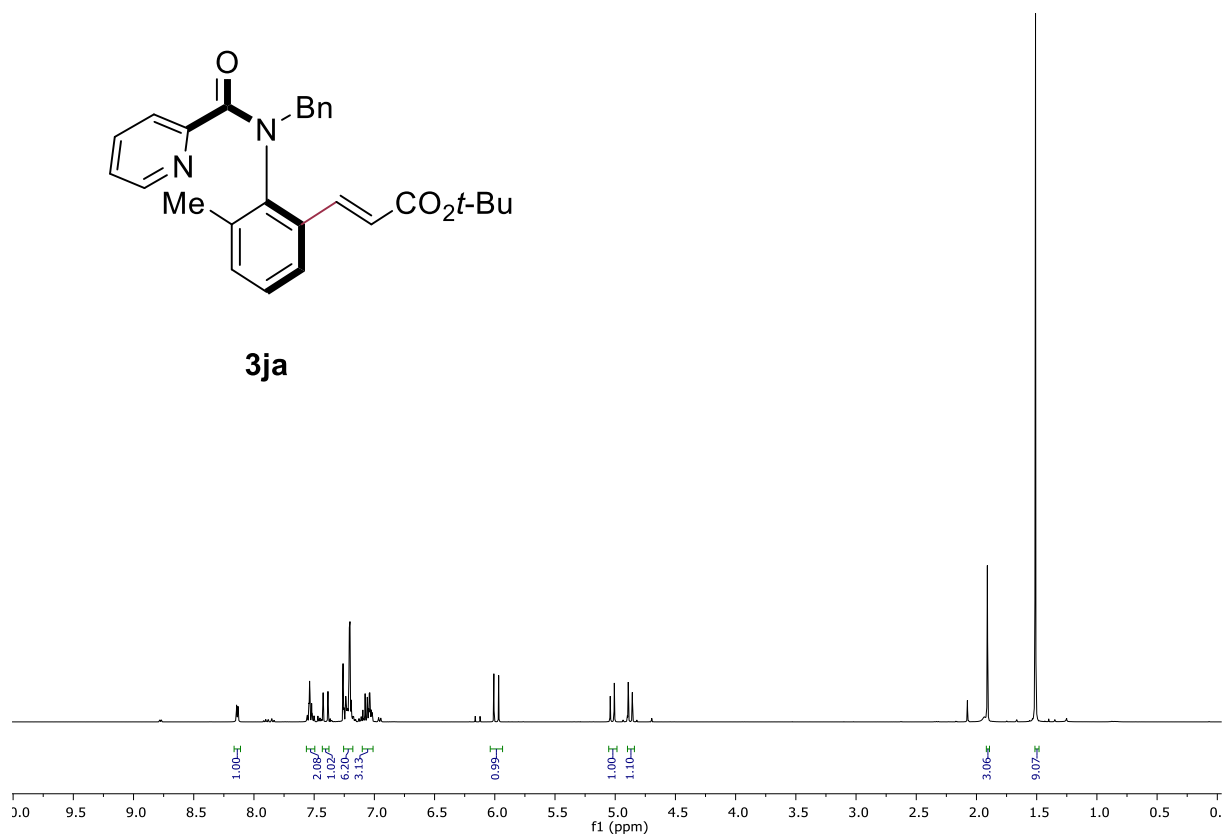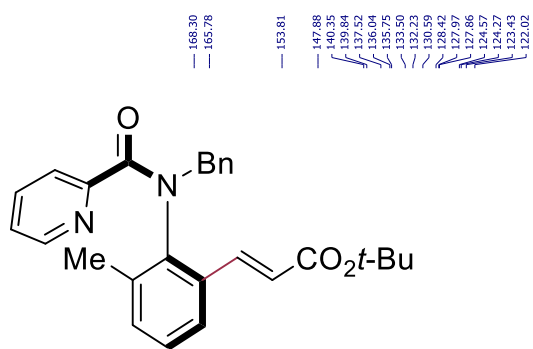

**3ja**

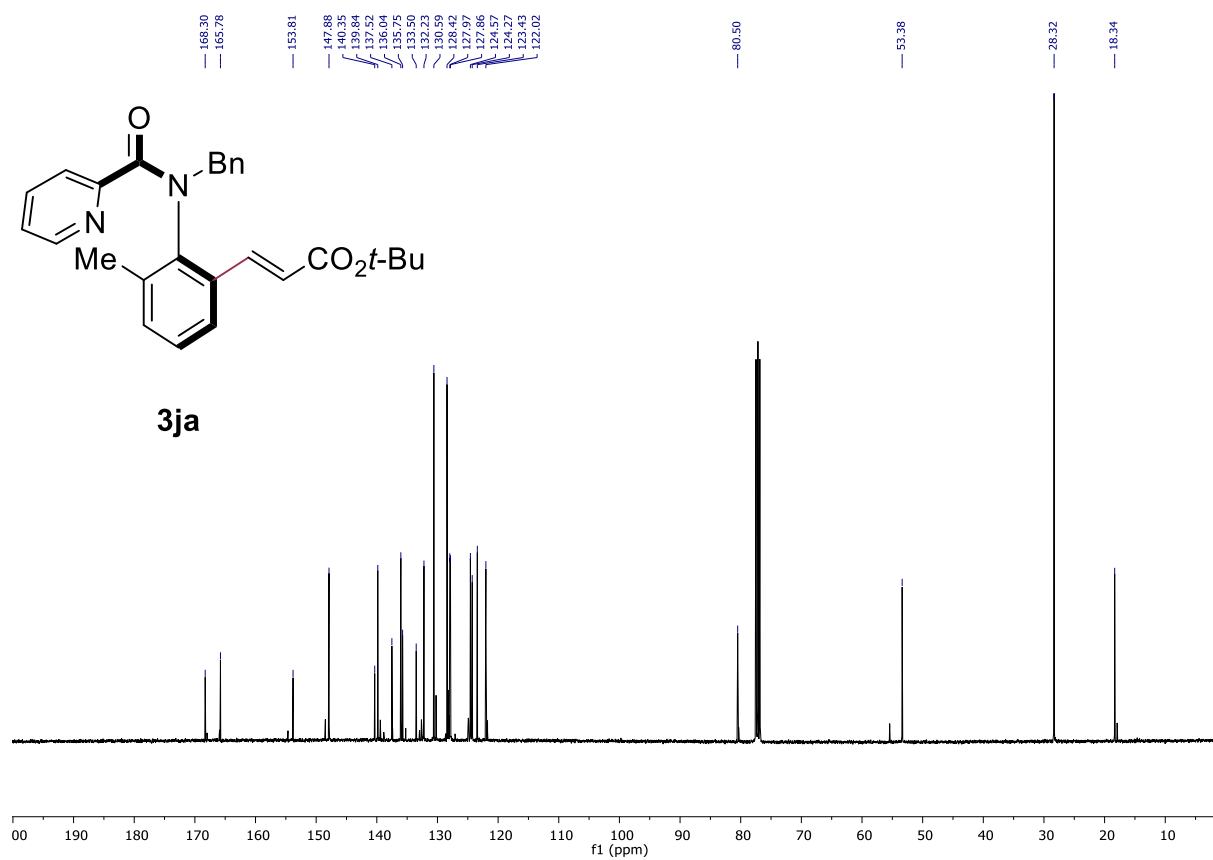

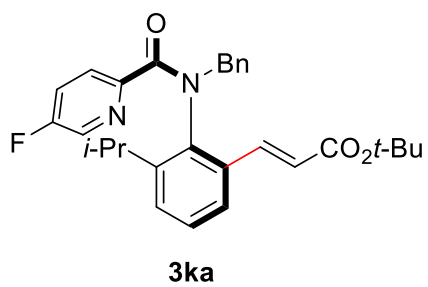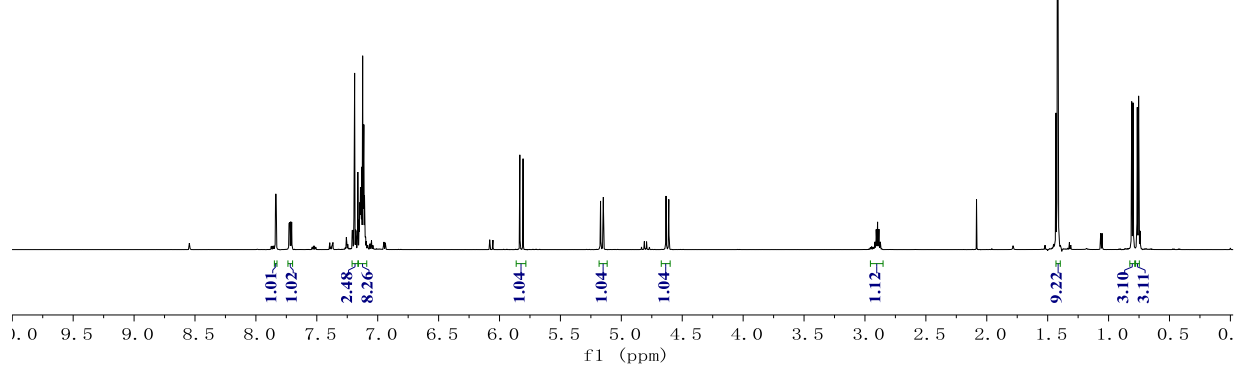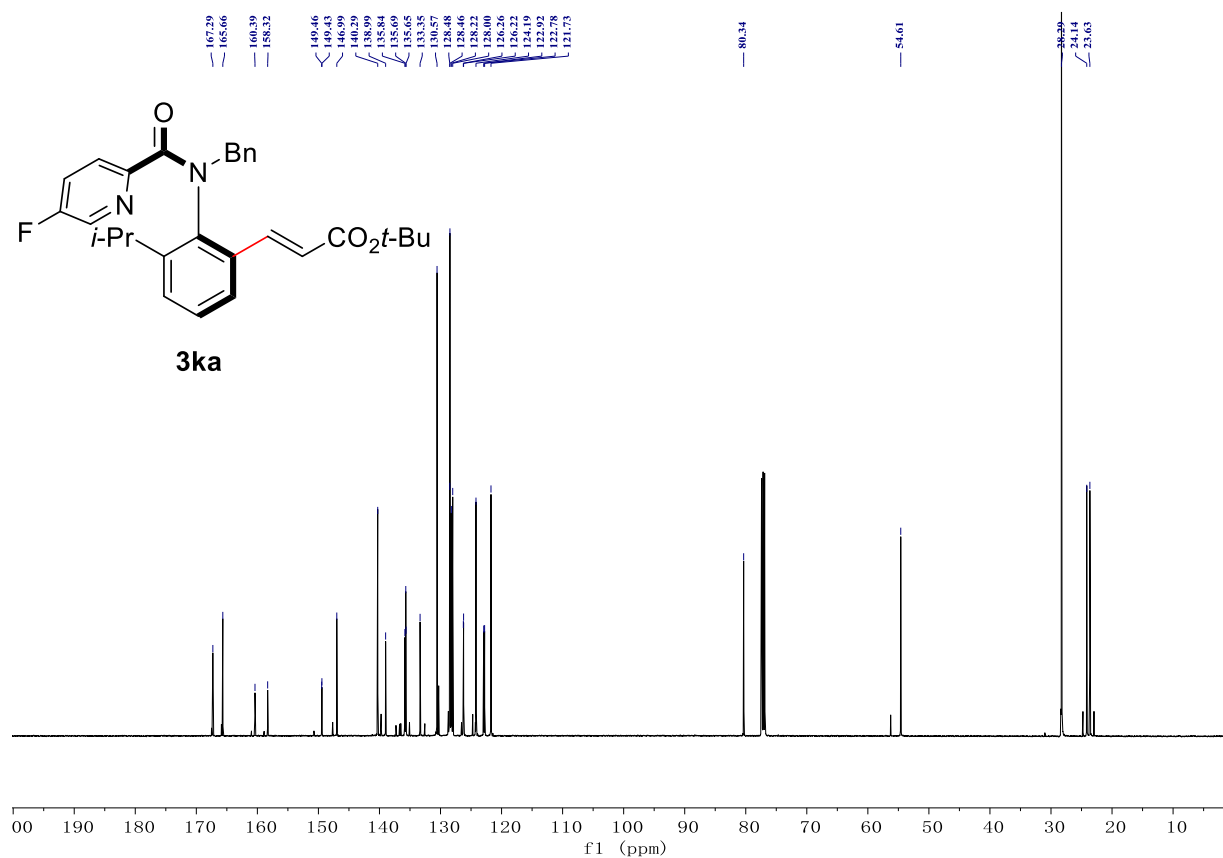

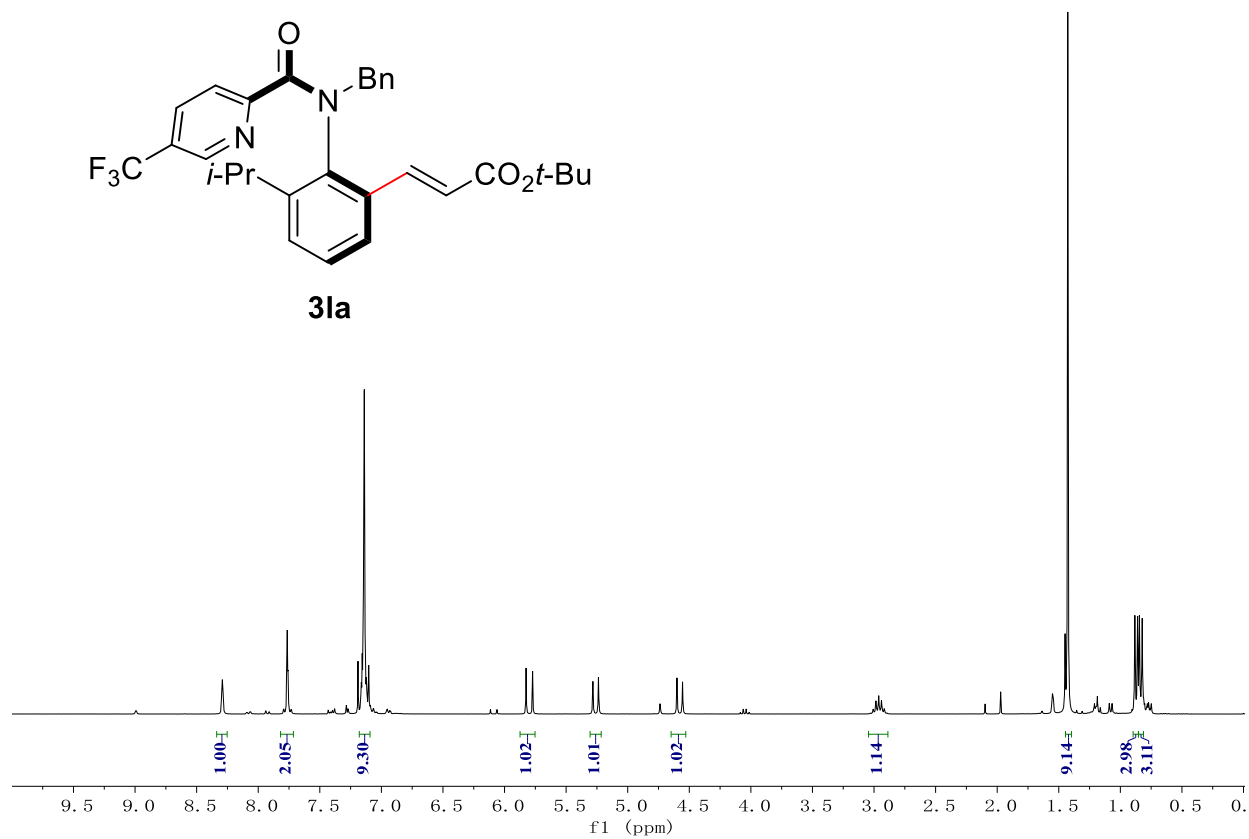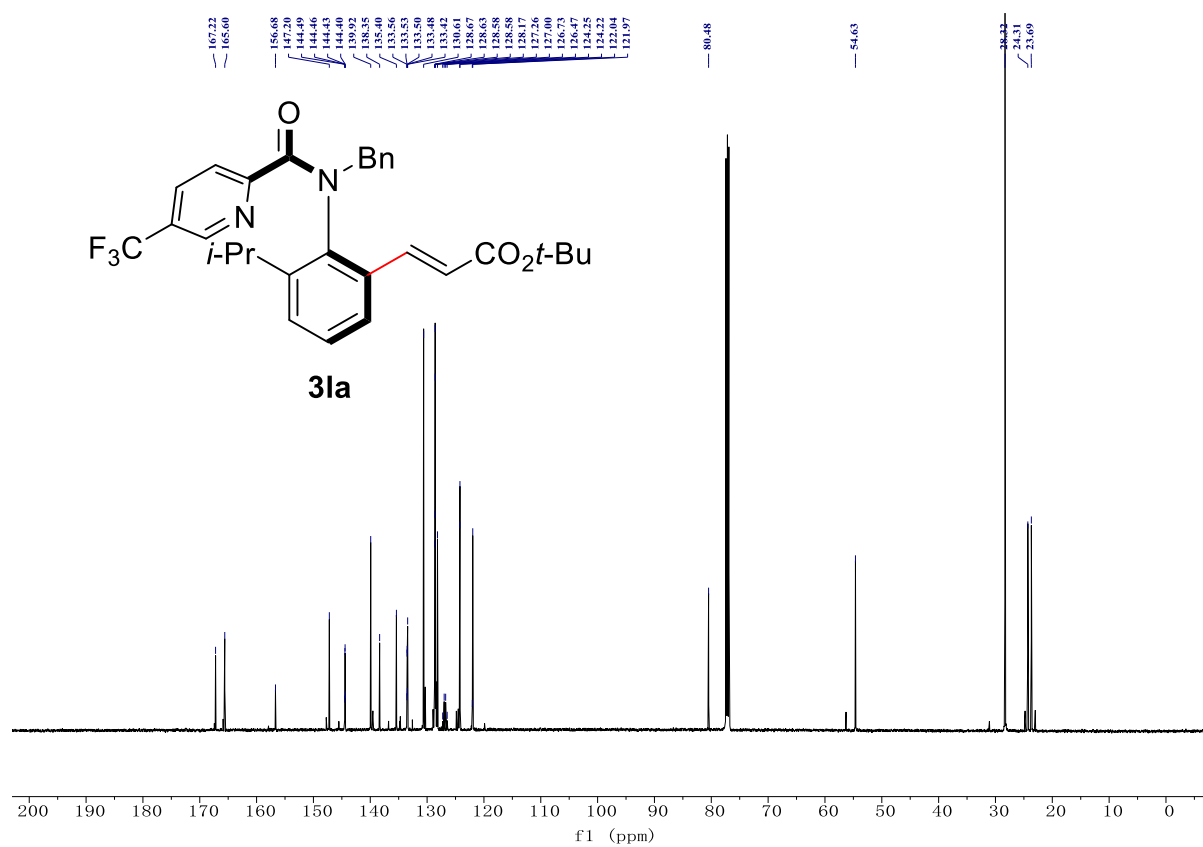

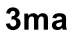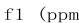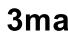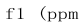

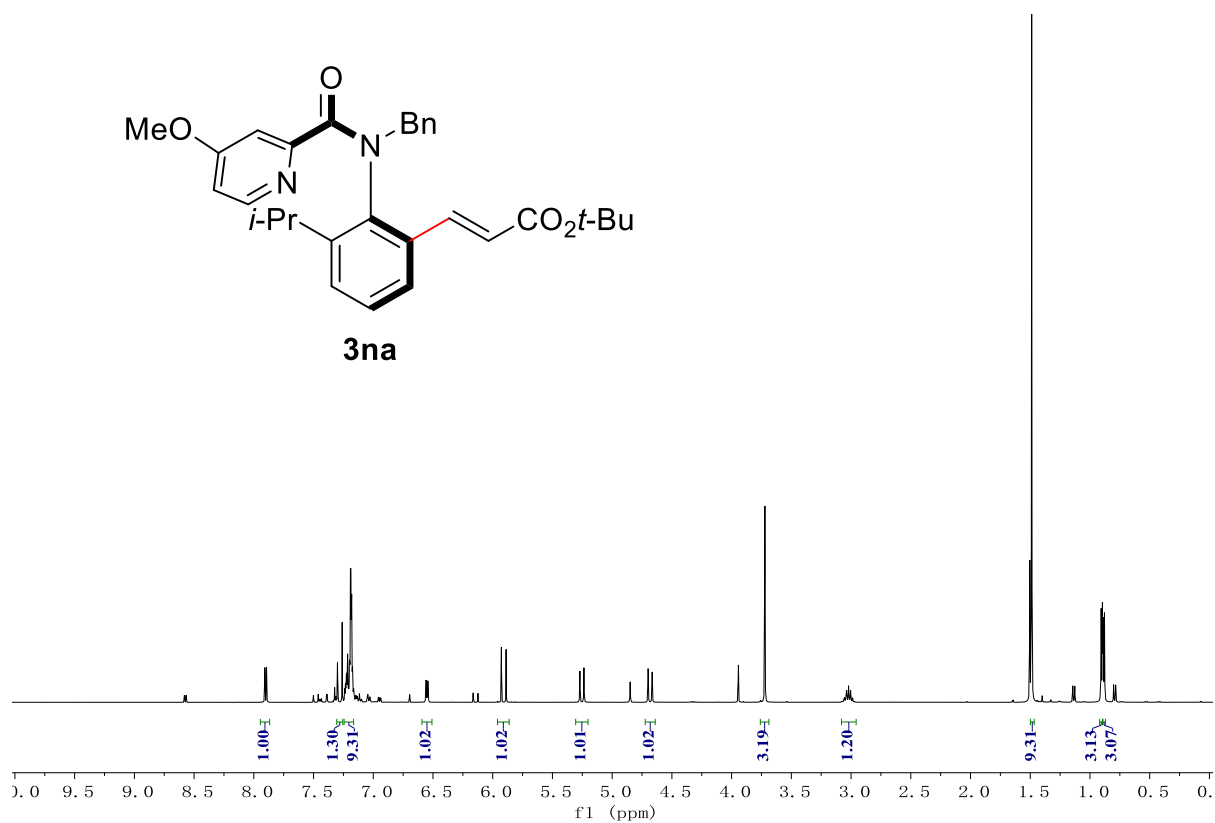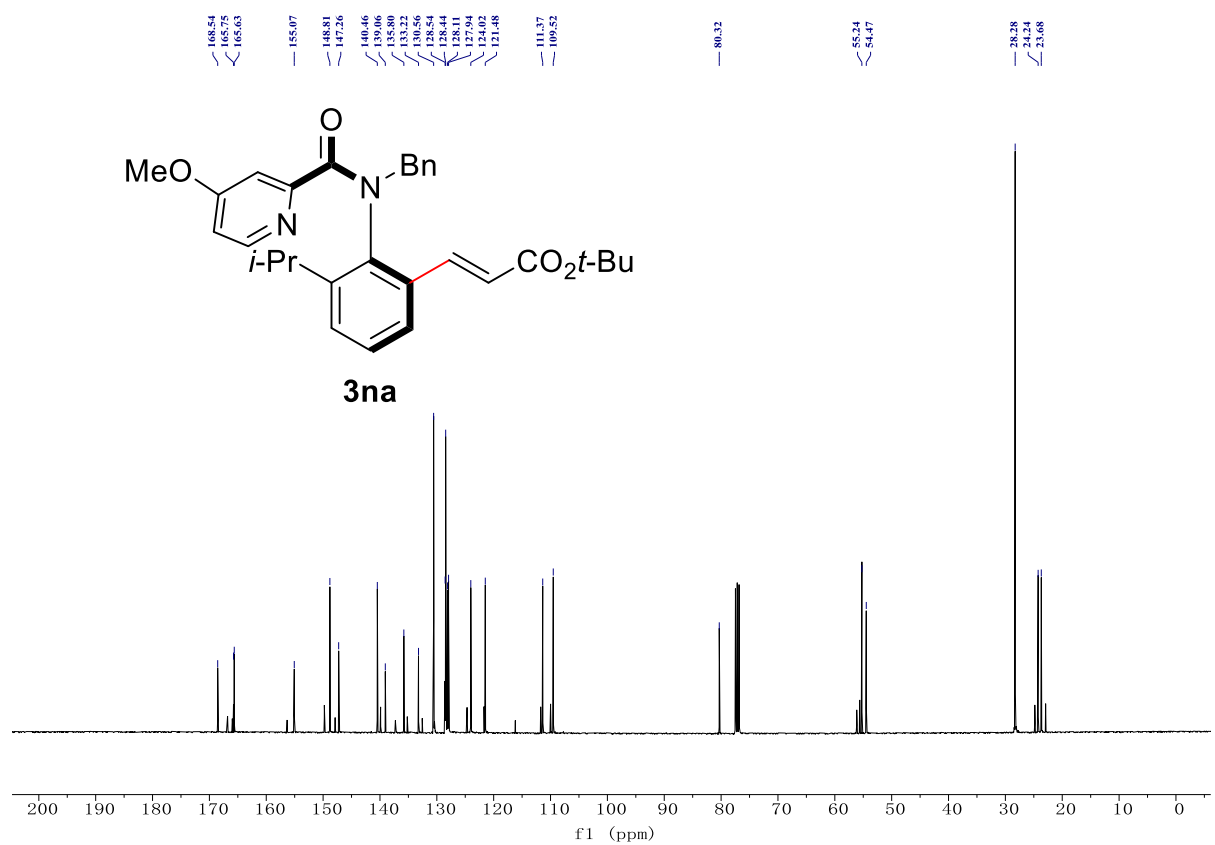

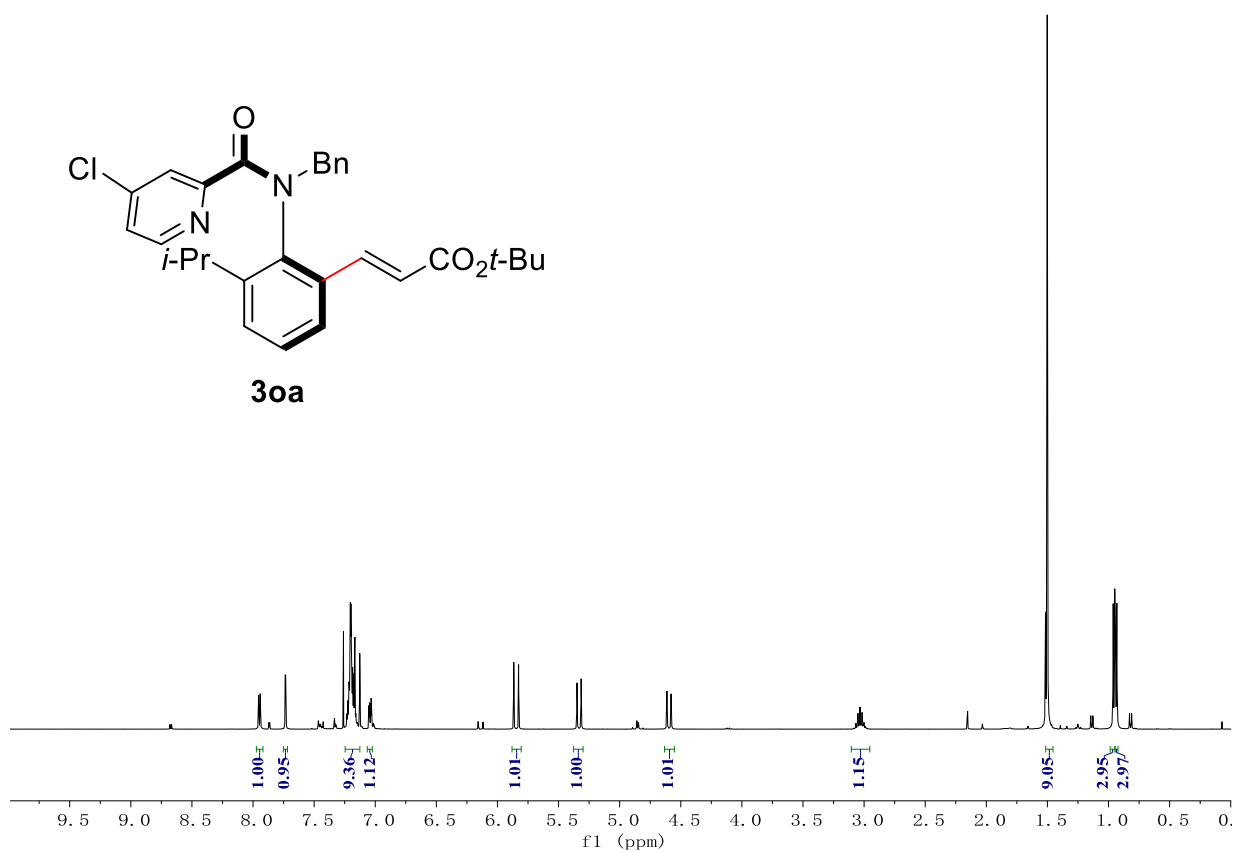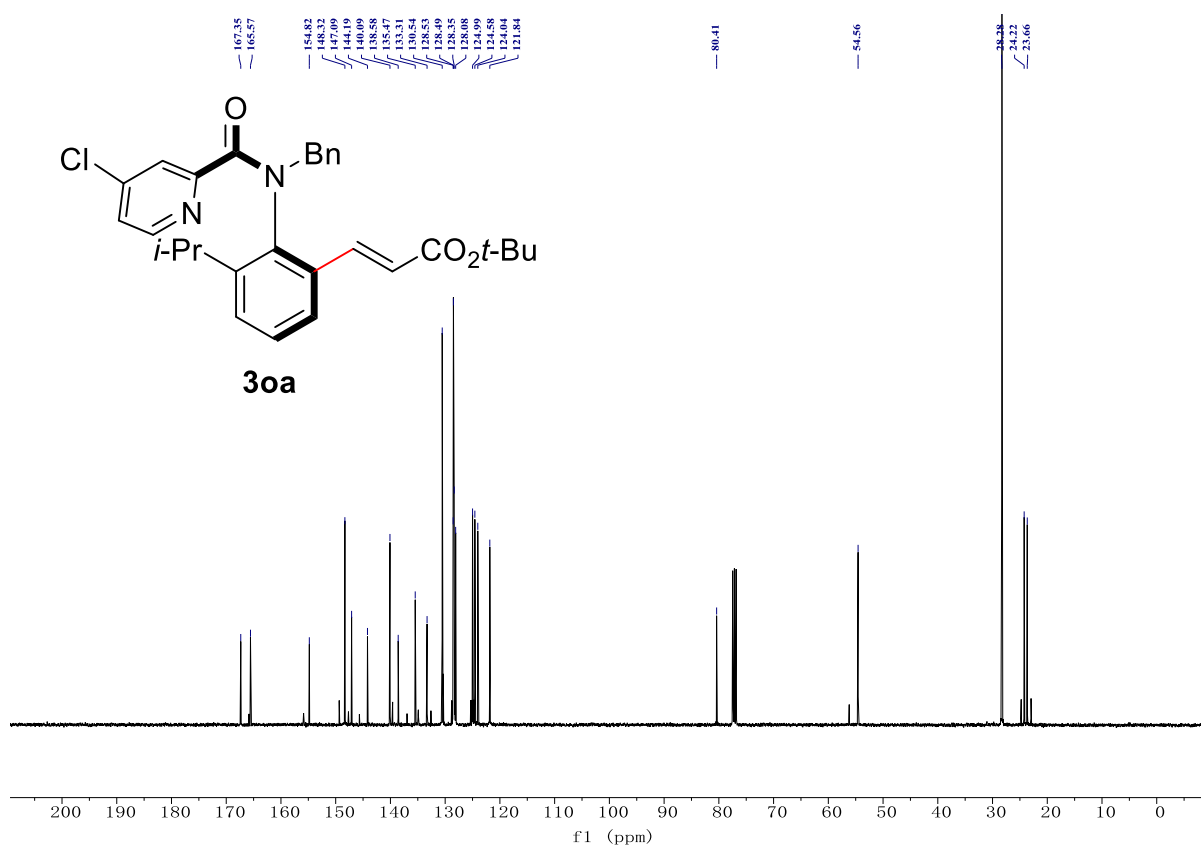

Supplement: d1sc06135f1.pdf [file d1sc06135f1.pdf]
